1 **Title**

2 Sampling biases obscure the early diversification of the largest living vertebrate  
3 group

4 **Authors**

5 Struan Henderson<sup>1\*</sup>, Emma M. Dunne<sup>1</sup>, Sam Giles<sup>1,2\*</sup>

6 <sup>1</sup>School of Geography Earth and Environmental Sciences, University of Birmingham,  
7 Birmingham B15 2TT, UK;

8 <sup>2</sup>Department of Earth Sciences, Natural History Museum, Cromwell Road, London  
9 SW7 5BD, UK;

10 \*authors for correspondence

11

12

13 **Abstract**

14 Extant ray-finned fishes (Actinopterygii) dominate marine and freshwater  
15 environments, yet their spatiotemporal diversity dynamics following their origin in the  
16 Palaeozoic are poorly understood. Previous studies investigate face-value patterns of  
17 richness, with only qualitative assessment of potential biases acting on the Palaeozoic  
18 actinopterygian fossil record. Here, we investigate palaeogeographic trends and apply  
19 richness estimation techniques to a recently-assembled occurrence database for Palaeozoic  
20 ray-finned fishes. We reconstruct patterns of local richness of Palaeozoic actinopterygians,  
21 alongside sampling standardised estimates of 'global' diversity. We identify substantial fossil  
22 record biases, such as geographic bias in the sampling of actinopterygian occurrences centred  
23 around Europe and North America. Similarly, estimates of diversity are skewed by extreme

24 unevenness in the abundance distributions of occurrences, reflecting past taxonomic practices  
25 and historical biases in sampling. Increasing sampling of poorly represented regions and  
26 expanding sampling beyond the literature to include museum collection data will be critical in  
27 obtaining accurate estimates of Palaeozoic actinopterygian diversity. In conjunction, applying  
28 diversity estimation techniques to well-sampled regional subsets of the 'global' dataset may  
29 identify accurate local diversity trends.

## 30 **Keywords**

31 diversity; sampling standardisation; Actinopterygii; fossil record bias; Palaeozoic.

## 32 **Introduction**

33 There are around 32,000 species of living ray-finned fishes (actinopterygians),  
34 amounting to over half of extant vertebrate diversity, and split roughly evenly between marine  
35 and freshwater environments (1). Ray-finned fishes originated in the Palaeozoic, which saw  
36 major evolutionary events and changes in the vertebrate fauna, such as the emergence of  
37 jaws (2), the rise of actinopterygians (3), and the move onto land (4). Despite these pivotal  
38 changes, and a long history of research on actinopterygians, there are relatively few  
39 macroevolutionary studies investigating diversity trends in their early evolution, and all  
40 examine face-value patterns of taxonomic richness (3,5–9).

41 Few studies investigate the suitability of the Palaeozoic ray-fin record for investigating  
42 diversity patterns, or potential biases. Notably, biases may impact the marine and freshwater  
43 record differently – late Palaeozoic Lagerstätten influence freshwater osteichthyan diversity  
44 more than marine (5). Low taxonomic diversity in the Devonian followed by an explosive  
45 increase in the early Carboniferous is generally interpreted as representing a genuine  
46 biological signal (3,10). Some authors qualitatively suggest that low Permian diversity is linked  
47 to the rarity of suitable deposits (11), or attribute the decline in richness among freshwater  
48 taxa to the loss of extensive Euramerican freshwater habitats (5). Other authors propose that  
49 the consistent ecomorphologies in typical Palaeozoic actinopterygians hint at constraints on

50 diversification into new ecologies and habitats and thus low richness (10). To date, previous  
51 studies only present face-value counts of actinopterygians through time without employing  
52 recent advances in methodologies to estimate diversity trends. An exception to this (5)  
53 performed coverage-based rarefaction to compare the Permian and Triassic as a whole, rather  
54 than to estimate diversity trends through time.

55         Assessing the degree to which fossil record biases affect interpretations of richness is  
56 critical to obtaining an accurate estimate of diversity trends (12–14). These biases can be  
57 geological (15,16), geographic (17–19), or anthropogenic (20,21) in nature, and recent  
58 analyses show that ‘global’ fossil records are intimately linked to the spatial extent of that  
59 record (17,18). Various statistical methods attempt to tease apart bias from genuine changes  
60 (e.g. classical rarefaction and residual modelling), though not without complications (e.g.  
61 classical rarefaction can flatten diversity patterns (22–25). Recent years have seen the  
62 application of Shareholder Quorum Subsampling (SQS), also termed coverage-based  
63 rarefaction (25,26), to palaeobiological occurrence databases (17–19,27–31) as a means of  
64 deducing trends in palaeodiversity through time. As SQS subsamples intervals to equal levels  
65 of completeness it returns more accurate relative richness estimates between sampled  
66 intervals than size-based rarefaction (23), although is still susceptible to some biases (21,24).  
67 Principally, SQS estimates can have a significant evenness signal (21,24,32), which may be  
68 particularly important for datasets that are biased in ways that skew the evenness of frequency  
69 distributions within sampled intervals. A new richness estimator, squares (33), estimates  
70 higher richness when there are numerous rare taxa (i.e. singletons) and when common taxa  
71 are especially abundant. Squares is more robust to uneven distributions than SQS, though  
72 falls short when the ratio of richness counts to total number of taxa within intervals is very high  
73 (24).

74         Until recently, no comprehensive through-Palaeozoic occurrence database existed (9),  
75 with previously-published databases limited in scope or not updated (3,5). Here, we apply  
76 coverage-based sampling standardisation to a newly-assembled occurrence database of

77 Palaeozoic actinopterygians to examine patterns of diversity, the suitability of the dataset, and  
78 the likely extent and impact of sampling biases.

## 79 **Methods**

### 80 ***Data preparation***

81 Global occurrences of Palaeozoic Actinopterygii (9) were screened for taxonomically  
82 indeterminate occurrences and scale- and teeth-based occurrences. After removal, this  
83 resulted in a dataset of 1,611 occurrences of 468 species (belonging to 225 genera), from 507  
84 unique geographic localities. All occurrences were assigned to intervals of roughly equal  
85 length (~9 Ma), determined by either combining shorter intervals (e.g. Kasimovian [3.3 Ma]  
86 and Gzhelian [4.8 Ma] = Kasimovian and Gzhelian [8.1 Ma]), or splitting longer intervals (e.g.  
87 Visean [15.8 Ma] = early Visean [Chadian-Holkerian; 8.7 Ma] and late Visean [Asbian-  
88 Brigantian; 7.1 Ma]; boundary based on the age of the Dunsapie basalt, see (34)). The cleaned  
89 dataset was used for local richness and diversity estimation. All analyses were conducted  
90 within R 4.1.0 (35).

### 91 ***Alpha diversity (local richness)***

92 Species per locality were counted as a measure of alpha diversity (local richness (36)).  
93 Modern coordinates for these localities were translated into palaeocoordinates using the R  
94 'chronosphere' package (37). Local richness was then subset by marine and freshwater  
95 environment (brackish environments were included in marine counts) and plotted against  
96 palaeolatitude. Additionally, palaeogeographic maps showing local richness were produced in  
97 'chronosphere' (37) for each interval. It is uncertain whether some Permian localities (Pastos  
98 Bons – Brazil; Deep Red Run, Dundee, McCann Quarry, Pond Creek, South Dakota State  
99 Cement Plant Quarry – USA; Sobernheim – Germany) are Artinskian or Kungurian in age, and  
100 these localities are therefore plotted in both palaeogeographic maps.

### 101 ***Sampling standardisation and diversity estimation***

102 Coverage-based sampling standardisation (22,26,38,39) was used to estimate global  
103 diversity patterns via the R package iNEXT (version 2.0.19 (40)), following the procedure  
104 outlined in Dunne *et al.* (28). The data were rarefied by geographic locality by analysing  
105 incidence-frequency matrices of the occurrence data. Extrapolated estimates were limited to  
106 no more than twice the observed sample size (40). Coverage-standardised richness was  
107 computed at genus level using roughly equal length bins, at quorum levels 0.3, 0.4, 0.5 for  
108 genus-level analysis and up to 0.6 quorum for species-level analysis; higher quorums were  
109 unattainable. Devonian bins were excluded due to the very small sample-sizes and low levels  
110 of coverage. Rank abundance distributions and size- and coverage-based rarefaction curves  
111 were generated for each interval to investigate the reliability of coverage-based rarefaction  
112 estimates.

113 Squares extrapolated estimates of genus and species richness were conducted in R  
114 by applying Alroy's equation (33), following the same procedure as Allen *et al.* (30).

## 115 **Results**

### 116 ***Alpha diversity (local richness)***

117 Local richness is generally low in the Devonian (figure 1), with only one locality  
118 containing more than three genera (Paddy's Valley, Gogo Formation, Frasnian, Australia).  
119 Levels of local richness are highest in the Carboniferous, particularly around the  
120 Serpukhovian-Moscovian boundary (figure 1), before declining steadily in the latest  
121 Carboniferous (Kasimovian and Gzhelian) and early Permian (Cisuralian). Notable localities  
122 contributing to the mid-Carboniferous peak include Glencartholm (Scotland, late Viséan,  
123 marine), Ardenrigg (Scotland, Bashkirian, freshwater), Longton (England, Bashkirian, marine)  
124 and the Bear Gulch localities (USA, Serpukhovian, marine) (figure 1a). Sampling of marine  
125 and brackish palaeoenvironments in the latest Carboniferous (Kasimovian and Gzhelian) and  
126 earliest Permian (Asselian and Sakmarian) is very poor. Freshwater localities are also poorly  
127 sampled in the Artinskian and Kungurian, yielding very low richness, while richness and

128 sampling also remains low in marine deposits. In the latest Permian (Wuchiapingian and  
129 Changhsingian), marine localities generally have much higher genus counts than freshwater  
130 localities.

### 131 ***Palaeomaps and geographic spread***

#### 132 Devonian

133 Despite their earliest occurrence being just north of the palaeoequator (*Meemannia*,  
134 Lochkovian, South China), actinopterygians are known almost exclusively from southern  
135 palaeolatitudes in the Devonian (figure 1b; figure 2a). Only two other northern hemisphere  
136 occurrences are reported (*Cheirolepis*, Givetian, Svalbard (41); *Krasnoyarichthys*,  
137 Famennian, Russia (42)). The majority of taxa occur at low palaeolatitudes (0° to -30°), with a  
138 small number just crossing into the mid-palaeolatitudinal band (-30° to -60°). A clear outlier,  
139 near the southern palaeopole (-83.81°), is the recently-reported *Austelliscus ferox* from Brazil  
140 (43).

141 Devonian actinopterygian occurrences mirror both continental configurations—the  
142 majority of landmasses and shallow seas were palaeoequatorial and in the southern  
143 hemisphere (44)—and the broader Devonian fossil record (18,45,46). Givetian and Eifelian  
144 occurrences are dominated by European (especially Scottish) deposits, with limited  
145 contributions from the USA, Australia, the Antarctic and Brazil (figure 2a). In contrast, Frasnian  
146 occurrences (figure 2b) are dominated by the Australian Gogo Formation, with fewer  
147 occurrences from Europe and North America, and a single occurrence from Iran. The USA  
148 dominates Famennian occurrences (figure 2c), with additional occurrences from Russia,  
149 Greenland and Belgium.

#### 150 Carboniferous

151 In general, Carboniferous localities have both higher local richness and a broader  
152 palaeolatitudinal spread than in the Devonian, although are generally still restricted to low and  
153 southern palaeolatitudes (figure 1b). Most Tournaisian localities are clustered at low

154 palaeolatitudes around the southern edge of Euramerica in regions that correspond to present-  
155 day Canada, USA, UK, and European Russia. Localities with lower local richness are found  
156 in Australia, Turkey, and Siberia. In contrast, early Visean (Chadian-Holkerian) low- to mid-  
157 palaeolatitudes are depauperate (figure 2e), although the Waaipoort Formation in South Africa  
158 (-78°) represents the richest high-palaeolatitude locality of the entire Palaeozoic.

159         For much of the rest of the Carboniferous, local richness greatly increases while  
160 palaeolatitudinal spread decreases. Other than single occurrences from Australia and the  
161 USA, all late Visean actinopterygians are clustered in the UK and Ireland, including the highly  
162 diverse Glencartholm locality (figures 1b and 2f). Similarly, in the Serpukhovian (figure 2g),  
163 only a single occurrence is found outside a 20° palaeolatitudinal band centred around the  
164 palaeoequator encompassing UK localities, a single Belgian locality, and the speciose Bear  
165 Gulch localities. Geographic spread continues to decline in the Bashkirian (figure 2h) and  
166 Moscovian (figure 2i), with all occurrences within 10° of latitude of the palaeoequator. Again,  
167 localities only are only known in Europe (Belgium, Czechia, France, Ireland, UK) and North  
168 America (Canada, USA). The only latest Carboniferous (Kasimovian and Gzhelian; figure 2j)  
169 locality outside of this band is the -60° Gzhelian Ganigobis Shale, which outcrops in South  
170 Africa and Namibia, albeit with low local richness. Broadly, Carboniferous actinopterygian  
171 palaeolatitudinal distribution matched other contemporaneous groups (18,46).

172 Permian

173         Compared to the Carboniferous and Devonian, Permian occurrences generally display  
174 a broader geographic spread (reflecting increases in the broader fossil record (18,46)) but  
175 lower local richness. The extent of palaeogeographic sampling in the Asselian and Sakmarian  
176 (figure 2k) is greater than the Kasimovian and Gzhelian, with more occurrences at higher  
177 palaeolatitudes, including the diverse Uruguayan fauna from Rio Negro (-53°). The Artinskian  
178 (figure 2l) is the most depauperate interval of the Palaeozoic outside of the Devonian, despite  
179 a comparatively high palaeogeographic spread: the locality with the highest local richness,

180 Loeriesfontein, contains only four genera. Contrary to most other Palaeozoic intervals, there  
181 are very few European Artinskian localities.

182 From the Kungurian (figure 2m) onwards, localities occur across the broadest  
183 palaeolatitudinal spread of the entire Palaeozoic. This includes the first sampling of northern  
184 mid-palaeolatitudes since the Tournaisian. Wordian and Roadian localities (figure 2n) with the  
185 highest local richness are found in Russia, centred around 30° palaeolatitude, although less  
186 diverse occurrences are seen at high southern palaeolatitudes in Brazil, India, and Zimbabwe.  
187 In contrast to most other intervals, only two depauperate localities occur near the  
188 palaeoequator. This trend continues into the Capitanian (figure 2o), where localities yielding  
189 few genera are found across a wide range of palaeolatitudes, with very few at equatorial  
190 latitudes, and most diversity stems from Russia.

191 The Wuchiapingian and Changhsingian interval (figure 2p) has the broadest  
192 geographic spread in sampling of the Palaeozoic, possibly due to intensive research focus on  
193 the Permo-Triassic mass extinction event (47,48). Numerous localities are spread from  
194 southern mid- to high-palaeolatitudes, including opposing sides of the palaeopole (present-  
195 day South Africa and Australia). Notably, this interval contains the first Palaeozoic  
196 actinopterygians from the eastern Palaeotethys (present-day China) aside from a single  
197 Lochkovian occurrence. Northern low- to mid-palaeolatitudes have the highest local richness,  
198 stemming from assemblages in the UK and Germany, Russia, and Greenland.

### 199 ***Palaeodiversity estimates***

#### 200 Coverage-based rarefaction

201 Estimates of relative genus richness using coverage-based rarefaction (figure 3a)  
202 suggest a gradual overall decline in diversity through the Carboniferous, with a sharp rise then  
203 subsequent fall in the Permian. Richness levels decrease from the Tournaisian through to the  
204 late Viséan (the most intensely sampled interval of the Carboniferous), before peaking in the  
205 Serpukhovian. The remainder of the Carboniferous is marked by a decline, with the lowest



206 observed values in the Kasimovian and Gzhelian, another intensely sampled interval.  
207 Richness estimates rise slightly across the Carboniferous-Permian boundary, followed by a  
208 precipitous rise in the Kungurian, where the highest levels in the Palaeozoic are reached. A  
209 steady decline marks the remainder of the Permian.

210 Coverage-rarefied estimates of species richness differ notably from genus estimates  
211 (figure 3b). Overall, estimates of species diversity generally increase, albeit irregularly, across  
212 the Carboniferous until a crash in the Kasimovian and Gzhelian, followed by two distinct peaks  
213 and declines in the Permian. Species richness initially decreases through the Tournaisian and  
214 Visean and increases in the Serpukhovian, with a drop into the Bashkirian and subsequent  
215 rise into the Moscovian, which represents the highest richness levels of the Carboniferous.  
216 This peak is immediately followed by a Kasimovian and Gzhelian trough. Levels rise steeply  
217 in the Asselian and Sakmarian followed by another abrupt drop in the Artinskian. There is only  
218 a modest rise into the Kungurian, with the major peak in species-level estimates seen in the  
219 Roadian and Wordian. A relative decrease in the Capitanian is followed by a minor decline  
220 through the Wuchiapingian and Changhsingian.

## 221 Squares

222 Squares diversity estimates contrast starkly with coverage-based rarefaction  
223 estimates: where coverage-based rarefaction returns low estimates, squares estimates are  
224 generally high. Squares-extrapolated genus richness estimates (figure 4a) gradually increase  
225 throughout the Devonian and into the Tournaisian. Early Visean estimates drop back to  
226 Famennian levels, before gradually rising in the late Visean to Serpukhovian. A slight decrease  
227 into the Bashkirian is followed by a steeper decline in the Moscovian. The highest estimates  
228 thus far are seen in the latest Carboniferous with a further increase into the Asselian and  
229 Sakmarian, followed by a precipitous drop in the Artinskian. Richness estimates rise in the  
230 Kungurian and marginally in the Roadian and Wordian before dropping in the Capitanian. The  
231 latest Permian (Wuchiapingian and Changhsingian) is the most diverse interval of the  
232 Palaeozoic.

233 Squares-extrapolated species richness trends (figure 4b) differ again from genus  
234 richness estimates. The pattern in the Devonian is in direct contrast, with estimates decreasing  
235 from the mid- through to late-Devonian in the Givetian and Eifelian, although a rise is observed  
236 across the Devonian-Carboniferous. As with genus estimates, the early Visean has lower  
237 richness than the Tournaisian. Species richness estimates rise significantly in the late Visean,  
238 quadrupling relative to the early Visean. The Serpukhovian sees a moderate decrease in  
239 richness, and this trend continues throughout the Bashkirian and Moscovian. Richness rises  
240 sharply in the Kasimovian and Gzhelian to the highest level of the entire Palaeozoic. A slight  
241 decrease across the Carboniferous-Permian boundary is followed by a precipitous drop in the  
242 Artinskian. Richness increases slightly in the Kungurian, recovers further in the Roadian and  
243 Wordian, declines again in the Capitanian, and finally increases in the latest Permian.

244

## 245 **Discussion**

### 246 ***Biogeographic trends and biases***

247 Palaeozoic actinopterygian occurrences are overwhelmingly geographically biased  
248 towards the northern hemisphere: fewer than 9% of known localities (52/586) are from the  
249 southern hemisphere (9). Certain regions are notably underrepresented throughout the  
250 Palaeozoic, such as the northern, eastern and southern Palaeotethys (present-day Middle  
251 East, south and east Asia, north Africa) and the northern coastline of Laurussia (present-day  
252 Siberia, Kazakhstan and interior of Asia). Sampling through much of the Devonian and  
253 Carboniferous is limited to a narrow band around the palaeoequator, largely corresponding to  
254 present-day Europe and North America (figure 2), which also contain localities with the highest  
255 local richness (9). The most diverse localities trend from low- to mid-palaeolatitudes through  
256 the Palaeozoic, essentially tracking the migration of North America and Europe (figure 1b).  
257 Reporting new taxa from underrepresented regions (41,43) will have major implications for  
258 palaeogeographical spread, patterns of diversity, and interpretations of ray-finned fish

259 evolution, especially in the face of taxonomic revisions invalidating many existing generic  
260 referrals (49,50).

261 Ideally, rarefaction curves for sampled intervals should be close to asymptote before  
262 performing diversity estimation techniques to ensure that future sampling will not drastically  
263 alter face-value counts of richness. Inspection of the Palaeozoic ray-finned fish record  
264 suggests this condition has not yet been reached (figure S1). In the short term, increased  
265 sampling of the most under sampled intervals will improve comparability. However, research  
266 focus on taxa from well-sampled regions that are languishing undescribed in museum  
267 collections (51,52) is also vital for attaining accurate estimates of actinopterygian diversity in  
268 the Palaeozoic, particularly at local scales.

269 Both marine and freshwater deposits are recorded throughout the Palaeozoic, with the  
270 number of sampled marine and freshwater deposits roughly tracking each other through much  
271 of the Carboniferous. However, marine palaeoenvironments are scarce in the later  
272 Palaeozoic. This long-recognised Permian imbalance (10,11,53) also extends back into the  
273 late Carboniferous (figure 1a). The near-complete lack of marine deposits suggests that low  
274 marine diversity in this period is linked to a geological bias and relative absence of these rocks  
275 rather than a true biological signal. There is certainly a change in the sampling of terrestrial  
276 vertebrates from aquatic to dryland terrestrial environments across the Carboniferous-  
277 Permian (54), and a similar change may explain the drop in sampling of Permian  
278 actinopterygians. Concurrent with this environmental shift is a noticeable palaeogeographical  
279 expansion: rather than being restricted to palaeoequatorial regions, Permian occurrences are  
280 reported from much higher and lower palaeolatitudes. It is unclear to what extent this  
281 represents a shift in sampling regime rather than an ecological expansion.

282

283 ***Palaeozoic actinopterygian diversity patterns***

284 Changes in local richness largely track changes in 'global' (gamma) raw diversity (9),  
285 with the exception of the latest Carboniferous and earliest Permian (figure 1). In the late  
286 Carboniferous and early Permian, high levels of sampling (localities and equal-area grid cells  
287 (9)) of isolated localities with low alpha diversity drives high 'global' diversity, with few  
288 contributions from diverse assemblages. These richness patterns are drastically different to  
289 those reported for Palaeozoic tetrapods (28), and the overall decrease from the Carboniferous  
290 to Permian contrasts the biodiversification of invertebrates over the same period (55).

291 In contrast to coverage-rarefied diversity estimates, extrapolated estimates from  
292 squares analysis return very similar trends to face-value counts of richness (3,5,9). These  
293 differences persist regardless of whether sampling is via equal length intervals or geological  
294 stages and are likely due to taxonomic biases (see below). This recalls recent work on  
295 Palaeozoic tetrapods, which found that diversity patterns among reptiles and synapsids  
296 changed significantly depending on the quorum levels or use of squares (56). For example,  
297 coverage-rarefied actinopterygian diversity decreases from the Tournaisian to the late Viséan  
298 in contrast with previous hypotheses (3,6,9), yet both the face-value counts and squares  
299 estimates increase significantly from the early to late Viséan. There is consensus however, in  
300 the high diversity of the Serpukhovian (3,9), indicating genuine diversity, though the vast  
301 majority of this is driven by the highly-diverse Bear Gulch fauna.

302 Trends into the Pennsylvanian also differ, with the greatest difference in the  
303 diametrically opposed estimates for the Kasimovian and Gzhelian, which is attributable to the  
304 ways in which the methods estimate diversity. The same is also true for the Asselian and  
305 Sakmarian and late Permian. Coverage-rarefied diversity estimates depend on the attainable  
306 level of coverage, and examination of abundance distributions (figure S2) and rarefaction  
307 curves (figure S3) reveals that at higher coverage, the Kasimovian and Gzhelian would most  
308 likely represent one of the most diverse intervals. Squares, however, estimates higher  
309 richness when there are many singletons and when common taxa are especially common

310 (24), and these intervals fulfil both of these criteria. The combined presence of superabundant  
311 taxa and numerous singletons results in these conflicting estimations.

312 Taxonomy also plays a key role. The observed rise in early Permian species-level  
313 diversity estimates in both analyses and face value readings (9) reflects the presence of  
314 numerous species of few genera (namely *Amblypterus* and *Paramblypterus*). The problem of  
315 superabundant genera is not unique to actinopterygians; such genera are known to bias other  
316 osteichthyan groups (57). In contrast, Kungurian estimates are based on very few occurrences  
317 of monospecific genera, and sampling of a high number of genera at low quorums results in  
318 high—yet unreliable—genus-level coverage-rarefied diversity estimates. The extremely high  
319 Roadian and Wordian species-level estimates in both analyses, not reflected at genus-level,  
320 can also be explained by high numbers of singletons and relative absence of common genera.

321

### 322 ***Unevenness in the actinopterygian fossil record***

323 Coverage-based rarefaction techniques produce the most reliable richness estimates  
324 when rank abundance does not differ considerably between samples, even when samples  
325 have comparable face-value richness (22–26,32,38). Unevenness in abundance distributions  
326 can therefore heavily influence the reliability of diversity estimates. Rank abundance  
327 distribution plots for Palaeozoic actinopterygian genera and species indicate extreme  
328 unevenness within intervals and variation in evenness between intervals (figure S2). Some  
329 intervals (e.g. Kasimovian and Gzhelian) contain one or two taxa with more than 60  
330 occurrences, a handful with between 30 and ten occurrences, and a long tail of singletons or  
331 doubletons; others (e.g. Frasnian) have a more even distribution. Differences can even arise  
332 between the genus- and species-level abundance distributions in the same interval: in the  
333 Asselian and Sakmarian most species-level diversity stems from multiple species of two  
334 genera (*Amblypterus* and *Paramblypterus*), resulting in low genus estimates at lower

335 quorums, but higher species-level estimates due to the more even abundance distributions  
336 (compare figures S2a and S2b; S3f and S3i).

337         Much of this imbalance is driven by ‘waste-basket’ genera erected by monographic  
338 descriptions (58–61), despite a wide range of varied morphologies and extensive temporal  
339 and geographic ranges within genera (9,62,63). These ‘waste-baskets’ serve to concentrate  
340 frequency counts of the most common genera, contributing to unevenness in the abundance  
341 distribution and distortion of coverage-based rarefaction estimates (22,23). The intervals most  
342 heavily biased towards superabundant taxa are the late Visean (*Elonichthys*: 54/266  
343 occurrences; *Rhadinichthys*: 54/266 occurrences), Kasimovian and Gzhelian (*Elonichthys*:  
344 65/230; *Sphaerolepis*: 60/230), Asselian and Sakmarian (*Paramblypterus*: 53/154  
345 occurrences; *Amblypterus*: 30/154 occurrences), and Wuchiapingian and Changhsingian  
346 (*Palaeoniscum*: 66/225 occurrences; *Platysomus*: 26/225 occurrences). As coverage-based  
347 rarefaction produces lower estimates when evenness is low (23), highly uneven intervals have  
348 low richness estimates at lower quorum levels (figure 3; figure S3). In contrast, at high  
349 quorums, where more taxa in the abundance distribution can be sampled, uneven intervals  
350 receive much higher richness estimates (see exponential rise in the rarefaction curves of  
351 uneven intervals at high coverage; figure S3).

352         ‘Waste-basket’ taxa may also mask true diversity: the dominance of highly abundant  
353 taxa means that a high proportion of sampled taxa consists of these few taxa, likely  
354 contributing to lower diversity estimates. Revisionary taxonomic work, such as recognising  
355 new genera among previously congeneric actinopterygians (49), and restriction of *Elonichthys*  
356 to just three species (50) rather than its previous 57, will alleviate this issue and mitigate the  
357 dominance of superabundant forms. These revisions, however, have the potential to increase  
358 unevenness in the other direction, as new taxa may end up as singletons or doubletons.  
359 Concurrently, the biostratigraphic significance of actinopterygians in deposits from the  
360 Permian of Russia (64–66) may contribute to oversplitting of taxa, echoing problems prevalent  
361 in the marine invertebrate fossil record (23).

362 Major variation in evenness between intervals is highlighted in the different trajectories  
363 of coverage-based rarefaction curves (figure S3). Taxonomic and geographic biases are  
364 exacerbated by small sample sizes and low coverage, with rarefaction curves crossing  
365 multiple times. Higher (more reliable) quorum levels are unobtainable for Palaeozoic  
366 actinopterygians due to the high number of singleton taxa (figure S3) controlling Good's  $u$  (67).  
367 As a result, coverage is generally low (figure S2) and only low quorums—at which evenness  
368 signals are more pronounced (24)—can be used. When evenness varies at low levels of  
369 sampling, size-based rarefaction can in fact be less biased than coverage-based rarefaction,  
370 especially at low levels of coverage (23). Trends between coverage- and size-based  
371 rarefaction estimates generally agree (figure S4), although size-based rarefaction estimates  
372 higher diversity in some highly uneven intervals (e.g. late Viséan; Wuchiapingian and  
373 Changhsingian). Small sample sizes (<200 occurrences) also have an effect on the accuracy  
374 of coverage estimates using Good's  $u$  (23): only four of the sampled Palaeozoic intervals have  
375 more than 200 occurrences (late Viséan: 266; Serpukhovian: 204; Kasimovian and Gzhelian:  
376 230; Wuchiapingian and Changhsingian: 232). Coverage-based rarefaction curves (figure S3)  
377 show these intervals to have among the highest coverage, along with the Bashkirian and  
378 Moscovian, highlighting the greater sampling of the Carboniferous than the Permian.  
379 Consequently, variation in evenness between intervals is having an overriding effect on  
380 sampling-standardised diversity estimates through time, with diversity estimates mostly  
381 tracking evenness and reflecting biases in the underlying data (23,68).

382

### 383 **Conclusions and future directions**

384 We present here the first local richness and palaeogeographic trends in Palaeozoic  
385 ray-finned fishes. Sampling of the Palaeozoic actinopterygian fossil record is heavily biased  
386 towards western Europe (especially the UK) and North America, which translates to a very  
387 restricted palaeogeographic spread for most of the Palaeozoic. A suite of compounding  
388 problems plagues the actinopterygian fossil record and results in bias towards occurrences of

389 both superabundant and singleton taxa, variation and unevenness in and between sampled  
390 intervals, and distortion of relative richness estimates. A combination of flawed taxonomic  
391 practices, differential researcher effort, and geographic sampling biases confounds attempts  
392 to accurately estimate relative richness between intervals. Meanwhile, sampling is poor for  
393 regions other than Europe and North America for all but a few Carboniferous and Permian  
394 intervals. The result of this poor sampling is the inability to reach the high levels of coverage  
395 that allow statistical methods of sampling standardisation to generate meaningful diversity  
396 estimates.

397 Identifying the underlying issues with Palaeozoic actinopterygian data and the  
398 interweaving biases that are impacting the fossil record is crucial, and improving sample sizes  
399 and coverage will help to mitigate the sensitivity to evenness (25). Documenting and including  
400 existing 'dark data' (51,52) in museum collections, as well as focus on new material from under  
401 sampled regions, represent key first steps. As a result, size-based rarefaction curves for  
402 Palaeozoic intervals will likely not reach asymptote soon (figure S1). More complete sampling  
403 of well-known regions (69) may facilitate deduction of accurate local richness patterns (36).  
404 This strategy also goes some way towards accounting for the significant spatial structuring of  
405 'global' fossil records (17–19,27).

406 Other recently proposed methods, such as coverage-rarefaction of extrapolated  
407 richness estimates (instead of face-value counts) (23), represent prospective avenues of  
408 research, both at local and global scales. However, existing global occurrence data for  
409 Palaeozoic actinopterygians is as yet inadequate for extrapolation in this way: sample sizes  
410 vary widely between intervals, which may result in inaccurate extrapolated richness trends  
411 (23,70,71); sample sizes in all intervals are too low for size-based rarefaction curves to  
412 asymptote (figure S1), meaning sample size has an overwhelming effect on diversity estimates  
413 (23); and abundance distributions are also highly uneven, which biases extrapolators (though  
414 to a lesser extent than coverage-based rarefaction; 17).



415 Overall, the occurrence data recorded in the literature is heavily impacted by sampling  
416 and likely results in inaccurate estimated diversity trends at present. Localised diversity  
417 estimates for well-sampled regions presents a feasible avenue of research for reconstructing  
418 regional diversity. In addition, research efforts to fix problematic taxonomy of ‘waste-basket’  
419 taxa, in hand with a general increase in sampling, open the possibility of estimating diversity  
420 in a spatially-standardised framework, so that we can truly begin to understand the origin, rise  
421 and establishment of the largest vertebrate clade.

422

### 423 **Acknowledgements**

424 We thank R. Butler, T. Clements, R. Figueroa, M. Friedman, L. Schnetz, R. Close, and G.  
425 Lloyd for helpful and insightful discussion during the course of this manuscript. We thank E.  
426 Bernard (Natural History Museum, London) and S. Walsh (National Museums of Scotland,  
427 Edinburgh) for collections access.

### 428 **Funding**

429 This work was funded by a Royal Society Dorothy Hodgkin Research Fellowship (DH160098)  
430 and Royal Society Enhancement Award (RGF\EA\180279), both to S. Giles. E. M. Dunne was  
431 also supported by a Leverhulme Research Project Grant (RPG-2019-365).

### 432 **References**

- 433 1. Nelson JS, Grande TC, Wilson MVH. *Fishes of the World*. Hoboken, N.J: John Wiley &  
434 Sons; 2016. 1067 p.
- 435 2. Sansom RS, Randle E, Donoghue PCJ. Discriminating signal from noise in the fossil  
436 record of early vertebrates reveals cryptic evolutionary history. *Proc R Soc B Biol Sci*.  
437 2015 Feb 7;282(1800):20142245.
- 438 3. Sallan LC, Coates MI. End-Devonian extinction and a bottleneck in the early evolution  
439 of modern jawed vertebrates. *Proc Natl Acad Sci*. 2010 Jun 1;107(22):10131–5.
- 440 4. Clack JA. *Gaining Ground, Second Edition: The Origin and Evolution of Tetrapods*.  
441 Indiana University Press; 2012. 560 p.

- 442 5. Romano C, Koot MB, Kogan I, Brayard A, Minikh AV, Brinkmann W, et al. Permian-  
443 Triassic Osteichthyes (bony fishes): diversity dynamics and body size evolution:  
444 Diversity and size of Permian-Triassic bony fishes. *Biol Rev.* 2016 Feb;91(1):106–47.
- 445 6. Thomson KS. The Pattern of Diversification Among Fishes. In: Hallam A, editor.  
446 *Developments in Palaeontology and Stratigraphy* [Internet]. Amsterdam: Elsevier; 1977  
447 [cited 2021 Feb 6]. p. 377–404. Available from:  
448 <https://www.sciencedirect.com/science/article/pii/S0920544608703327>
- 449 7. Patterson C. Bony Fishes. *Short Courses Paleontol.* 1994;7:57–84.
- 450 8. Blicek A. The André Dumont medallist lecture: From adaptive radiations to biotic crises  
451 in Palaeozoic vertebrates: a geobiological approach. *Geol Belg.* 2011 Jan 1;14:203–27.
- 452 9. Henderson S, Dunne EM, Giles S. The early diversification of ray-finned fishes  
453 (Actinopterygii): hypotheses, challenges and future prospects. 2021 Aug 14 [cited 2022  
454 Mar 29]; Available from: <https://eartharxiv.org/repository/view/2613/>
- 455 10. Friedman M, Sallan LC. Five hundred million years of extinction and recovery: a  
456 Phanerozoic survey of large-scale diversity patterns in fishes. *Palaeontology.* 2012  
457 Jul;55(4):707–42.
- 458 11. Hurley IA, Mueller RL, Dunn KA, Schmidt EJ, Friedman M, Ho RK, et al. A new time-  
459 scale for ray-finned fish evolution. *Proc R Soc B Biol Sci.* 2007 Feb 22;274(1609):489–  
460 98.
- 461 12. Raup DM. Taxonomic Diversity during the Phanerozoic. *Science.* 1972 Sep  
462 22;177(4054):1065–71.
- 463 13. Sepkoski JJ. A factor analytic description of the Phanerozoic marine fossil record.  
464 *Paleobiology.* 1981 ed;7(1):36–53.
- 465 14. Alroy J, Aberhan M, Bottjer DJ, Foote M, Fürsich FT, Harries PJ, et al. Phanerozoic  
466 Trends in the Global Diversity of Marine Invertebrates. *Science.* 2008 Jul  
467 4;321(5885):97–100.
- 468 15. Wall PD, Ivany LC, Wilkinson BH. Impact of outcrop area on estimates of Phanerozoic  
469 terrestrial biodiversity trends. *Geol Soc Lond Spec Publ.* 2011 Jan 1;358(1):53–62.
- 470 16. Peters SE. Geologic constraints on the macroevolutionary history of marine animals.  
471 *Proc Natl Acad Sci.* 2005 Aug 30;102(35):12326–31.
- 472 17. Close RA, Benson RBJ, Alroy J, Carrano MT, Cleary TJ, Dunne EM, et al. The  
473 apparent exponential radiation of Phanerozoic land vertebrates is an artefact of spatial  
474 sampling biases. *Proc R Soc B Biol Sci.* 2020 Apr 8;287(1924):20200372.
- 475 18. Close RA, Benson RBJ, Saupe EE, Clapham ME, Butler RJ. The spatial structure of  
476 Phanerozoic marine animal diversity. *Science.* 2020 Apr 24;368(6489):420–4.
- 477 19. Close RA, Benson RBJ, Upchurch P, Butler RJ. Controlling for the species-area effect  
478 supports constrained long-term Mesozoic terrestrial vertebrate diversification. *Nat*  
479 *Commun.* 2017 Aug;8(1):15381.

- 480 20. Raja NB, Dunne EM, Matiwane A, Khan TM, Nätscher PS, Ghilardi AM, et al. Colonial  
481 history and global economics distort our understanding of deep-time biodiversity. *Nat*  
482 *Ecol Evol.* 2022 Feb;6(2):145–54.
- 483 21. Upchurch P, Mannion PD, Benson RBJ, Butler RJ, Carrano MT. Geological and  
484 anthropogenic controls on the sampling of the terrestrial fossil record: a case study  
485 from the Dinosauria. *Geol Soc Lond Spec Publ.* 2011;358(1):209–40.
- 486 22. Alroy J. Geographical, environmental and intrinsic biotic controls on Phanerozoic  
487 marine diversification. *Palaeontology.* 2010 Nov;53(6):1211–35.
- 488 23. Close RA, Evers SW, Alroy J, Butler RJ. How should we estimate diversity in the fossil  
489 record? Testing richness estimators using sampling-standardised discovery curves.  
490 Cooper N, editor. *Methods Ecol Evol.* 2018 Jun;9(6):1386–400.
- 491 24. Alroy J. On four measures of taxonomic richness. *Paleobiology.* 2020 May;46(2):158–  
492 75.
- 493 25. Chao A, Jost L. Coverage-based rarefaction and extrapolation: standardizing samples  
494 by completeness rather than size. *Ecology.* 2012;93(12):2533–47.
- 495 26. Alroy J. The Shifting Balance of Diversity Among Major Marine Animal Groups.  
496 *Science.* 2010 Sep 3;329(5996):1191–4.
- 497 27. Benson RBJ, Butler RJ, Alroy J, Mannion PD, Carrano MT, Lloyd GT. Near-Stasis in  
498 the Long-Term Diversification of Mesozoic Tetrapods. *PLOS Biol.* 2016 Jan  
499 25;14(1):e1002359.
- 500 28. Dunne EM, Close RA, Button DJ, Brocklehurst N, Cashmore DD, Lloyd GT, et al.  
501 Diversity change during the rise of tetrapods and the impact of the 'Carboniferous  
502 rainforest collapse'. *Proc R Soc B Biol Sci.* 2018 Feb 14;285(1872):20172730.
- 503 29. Cleary TJ, Benson RBJ, Evans SE, Barrett PM. Lepidosaurian diversity in the  
504 Mesozoic–Palaeogene: the potential roles of sampling biases and environmental  
505 drivers. *R Soc Open Sci.* 2018;5(3):171830.
- 506 30. Allen BJ, Wignall PB, Hill DJ, Saupe EE, Dunhill AM. The latitudinal diversity gradient  
507 of tetrapods across the Permo-Triassic mass extinction and recovery interval. *Proc R*  
508 *Soc B Biol Sci.* 2020 Jun 24;287(1929):20201125.
- 509 31. Cleary TJ, Benson RBJ, Holroyd PA, Barrett PM. Tracing the patterns of non-marine  
510 turtle richness from the Triassic to the Palaeogene: from origin to global spread.  
511 *Palaeontology.* 2020;63(5):753–74.
- 512 32. Mitchell JS. Preservation is predictable: quantifying the effect of taphonomic biases on  
513 ecological disparity in birds. *Paleobiology.* 2015 Mar;41(2):353–67.
- 514 33. Alroy J. Limits to species richness in terrestrial communities. *Ecol Lett.*  
515 2018;21(12):1781–9.
- 516 34. Monaghan AA, Browne MAE, Barfod DN. An improved chronology for the Arthur's Seat  
517 volcano and Carboniferous magmatism of the Midland Valley of Scotland. *Scott J Geol.*  
518 2014 Oct 1;50(2):165–72.

- 519 35. R Core Team. R: A language and environment for statistical computing. [Internet].  
520 Vienna, Austria: R Foundation for Statistical Computing; 2020. Available from:  
521 <https://www.R-project.org/>
- 522 36. Close RA, Benson RBJ, Alroy J, Behrensmeyer AK, Benito J, Carrano MT, et al.  
523 Diversity dynamics of Phanerozoic terrestrial tetrapods at the local-community scale.  
524 *Nat Ecol Evol.* 2019 Apr;3(4):590–7.
- 525 37. m T. Kocsis, Nussaibah B. Raja. chronosphere: Earth system history variables  
526 (pre-release) (Version 0.1.5). Zenodo. <http://doi.org/10.5281/zenodo.3525482>  
527 [Internet]. Zenodo; 2019 [cited 2021 Apr 22]. Available from:  
528 <https://zenodo.org/record/3525482#.YIGQo-hKhjE>
- 529 38. Alroy J. Fair Sampling of Taxonomic Richness and Unbiased Estimation of Origination  
530 and Extinction Rates. *Paleontol Soc Pap.* 2010 Oct;16:55–80.
- 531 39. Alroy J. Accurate and precise estimates of origination and extinction rates.  
532 *Paleobiology.* 2014 May;40(3):374–97.
- 533 40. Hsieh TC, Ma KH, Chao A. iNEXT: an R package for rarefaction and extrapolation of  
534 species diversity (Hill numbers). *Methods Ecol Evol.* 2016;7(12):1451–6.
- 535 41. Newman M, Burrow C, Blaauwen J den, Giles S. A new actinopterygian *Cheirolepis*  
536 *jonesi* nov. sp. from the Givetian of Spitsbergen, Svalbard. *Nor J Geol.* 2021 Apr  
537 26;101:202103.
- 538 42. Prokofiev AM. First finding of an articulated actinopterygian skeleton from the Upper  
539 Devonian of Siberia and a reappraisal of the family Moythomasiidae Kazantseva, 1971  
540 (*Osteichthyes*). *Paleontol Res.* 2002;6(3):321–7.
- 541 43. Figueroa RT, Weinschutz LC, Friedman M. The oldest Devonian circumpolar ray-finned  
542 fish? *Biol Lett.* 2021;17(3):20200766.
- 543 44. Dowding EM, Ebach MC. Evaluating Devonian bioregionalization: quantifying  
544 biogeographic areas. *Paleobiology.* 2019 Sep;45(4):636–51.
- 545 45. Allison PA, Briggs DEG. Paleolatitudinal sampling bias, Phanerozoic species diversity,  
546 and the end-Permian extinction. *Geology.* 1993 Jan 1;21(1):65–8.
- 547 46. Powell MG. The Latitudinal Diversity Gradient of Brachiopods over the Past 530 Million  
548 Years. *J Geol.* 2009 Nov;117(6):585–94.
- 549 47. Puttick MN, Kriwet J, Wen W, Hu S, Thomas GH, Benton MJ. Body length of bony  
550 fishes was not a selective factor during the biggest mass extinction of all time.  
551 *Palaeontology.* 2017;60(5):727–41.
- 552 48. Vazquez P, Clapham ME. Extinction selectivity among marine fishes during  
553 multistressor global change in the end-Permian and end-Triassic crises. *Geology.* 2017  
554 May;45(5):395–8.
- 555 49. Coates MI, Tietjen K. ‘This strange little palaeoniscid’: a new early actinopterygian  
556 genus, and commentary on pectoral fin conditions and function. *Earth Environ Sci*  
557 *Trans R Soc Edinb.* 2018 Mar;109(1–2):15–31.

- 558 50. Schindler T. Neubeschreibung und erste Rekonstruktion von *Elonichthys germari*  
559 Giebel, 1848. Hallesches Jahrb Für Geowiss. 2018 Aug 15;41:1–33.
- 560 51. Marshall CR, Finnegan S, Clites EC, Holroyd PA, Bonuso N, Cortez C, et al.  
561 Quantifying the dark data in museum fossil collections as palaeontology undergoes a  
562 second digital revolution. Biol Lett. 2018 Sep;14(9):20180431.
- 563 52. Allmon WD, Dietl GP, Hendricks JR, Ross RM. Bridging the two fossil records:  
564 Paleontology's "big data" future resides in museum collections. In: Rosenberg GD,  
565 Clary R, editors. Museums at the Forefront of the History and Philosophy of Geology:  
566 History Made, History in the Making [Internet]. Boulder, CO: Geological Society of  
567 America; 2018 [cited 2021 Feb 4]. Available from:  
568 <https://pubs.geoscienceworld.org/books/book/2085/chapter/114636571>
- 569 53. McGowan AJ, Smith AB. Are global Phanerozoic marine diversity curves truly global? A  
570 study of the relationship between regional rock records and global Phanerozoic marine  
571 diversity. Paleobiology. 2008;34(1):80–103.
- 572 54. Pardo JD, Small BJ, Milner AR, Huttenlocker AK. Carboniferous–Permian climate  
573 change constrained early land vertebrate radiations. Nat Ecol Evol. 2019 Feb;3(2):200–  
574 6.
- 575 55. Fan J xuan, Shen S zhong, Erwin DH, Sadler PM, MacLeod N, Cheng Q ming, et al. A  
576 high-resolution summary of Cambrian to Early Triassic marine invertebrate biodiversity.  
577 Science. 2020 Jan 17;367(6475):272–7.
- 578 56. Brocklehurst N. The First Age of Reptiles? Comparing Reptile and Synapsid Diversity,  
579 and the Influence of Lagerstätten, During the Carboniferous and Early Permian. Front  
580 Ecol Evol. 2021;9:507.
- 581 57. Gardner JD, Surya K, Organ CL. Early tetrapodomorph biogeography: Controlling for  
582 fossil record bias in macroevolutionary analyses. Comptes Rendus Palevol. 2019 Oct  
583 1;18(7):699–709.
- 584 58. Agassiz. Recherches sur les Poissons Fossiles. Imprimerie de Petitpierre et Prince,  
585 Neuchâtel; 1833. 948 p.
- 586 59. Traquair RH. The Ganoid Fishes of the British Carboniferous Formations. Part 1.  
587 Palæoniscidæ. Pages 1–60; Plates I–VII. Monogr Palaeontogr Soc. 1877  
588 Feb;31(140):1–60.
- 589 60. Moy-Thomas JA, Dyne MB. XVII.—The Actinopterygian Fishes from the Lower  
590 Carboniferous of Glencartholm, Eskdale, Dumfriesshire. Earth Environ Sci Trans R Soc  
591 Edinb. 1938 ed;59(2):437–80.
- 592 61. Gardiner BG. New palaeoniscoid fish from the Witteberg series of South Africa. Zool J  
593 Linn Soc. 1969 Nov;48(4):423–52.
- 594 62. Mickle KE. The lower actinopterygian fauna from the Lower Carboniferous Albert shale  
595 formation of New Brunswick, Canada – a review of previously described taxa and a  
596 description of a new genus and species. Foss Rec. 2017 Jan 31;20(1):47–67.
- 597 63. Sallan LC. Major issues in the origins of ray-finned fish (Actinopterygii) biodiversity:  
598 Ray-finned fish (Actinopterygii) origins. Biol Rev. 2014 Nov;89(4):950–71.

- 599 64. Minikh AV, Minikh MG. Ikhtiofauna permi Evropeiskoi Rossii (Permian Ichthyofauna of  
600 the European Russia). Saratov: Tsentr Nauka; 2009. 243 p.
- 601 65. Tverdokhlebov VP, Tverdokhlebova GI, Minikh AV, Surkov MV, Benton MJ. Upper  
602 Permian vertebrates and their sedimentological context in the South Urals, Russia.  
603 *Earth-Sci Rev.* 2005 Feb 1;69(1):27–77.
- 604 66. Nurgaliev DK, Silantiev VV, Nikolaeva SV, editors. Type and Reference Sections of the  
605 Middle and Upper Permian of the Volga and Kama River Regions. Kazan: Kazan  
606 University Press; 2015. 208 p. (A Field Guidebook of XVIII International Congress on  
607 the Carboniferous and Permian).
- 608 67. Good IJ. The population frequencies of species and the estimation of population  
609 parameters. *Biometrika.* 1953 Dec 1;40(3–4):237–64.
- 610 68. Hannisdal B, Haaga KA, Reitan T, Diego D, Liow LH. Common species link global  
611 ecosystems to climate change: dynamical evidence in the planktonic fossil record. *Proc*  
612 *R Soc B Biol Sci.* 2017 Jul 12;284(1858):20170722.
- 613 69. Lloyd GT, Friedman M. A survey of palaeontological sampling biases in fishes based  
614 on the Phanerozoic record of Great Britain. *Palaeogeogr Palaeoclimatol Palaeoecol.*  
615 2013 Feb 15;372:5–17.
- 616 70. Chao A, Colwell RK, Lin CW, Gotelli NJ. Sufficient sampling for asymptotic minimum  
617 species richness estimators. *Ecology.* 2009;90(4):1125–33.
- 618 71. Colwell RK, Coddington JA, Hawksworth DL. Estimating terrestrial biodiversity through  
619 extrapolation. *Philos Trans R Soc Lond B Biol Sci.* 1994 Jul 29;345(1311):101–18.

620

621

## 622 **Figures**

623 Figure 1 – Local richness (number of species per fossil locality) of actinopterygians through  
624 the Palaeozoic. (a) Local richness plotted by environment, separated by freshwater (red) and  
625 marine (blue; incorporates brackish occurrences). Colour saturation (transparency) indicates  
626 density of localities, and the most genus-rich localities are labelled. Note that purple  
627 indicates contemporary localities with similar diversity of marine and freshwater  
628 actinopterygians. (b) Palaeolatitude of localities through time, with local richness indicated by  
629 colour (yellow localities have low richness, progressing through green to the most diverse  
630 localities in indigo).

631 Figure 2 – Palaeomaps showing palaeogeographic spread and local richness of individual  
632 localities through time plotted in roughly even-length intervals. Colour scales correspond to  
633 the richness of localities, ranging from low (light blue) to high (pink) richness.

634 Figure 3 – Coverage-based rarefaction estimates of Carboniferous and Permian  
635 actinopterygian diversity at (a) genus- and (b) species-level, showing estimates for different  
636 quorum levels in different colours from low quorums (0.3) in light blue to higher quorums  
637 (0.6) in darker blue. The shaded areas for each quorum are confidence intervals of  
638 estimates. Devonian intervals removed (see Methods). Estimates were either interpolated  
639 (circles) or extrapolated (squares) up to twice the reference sample size (40).

640 Figure 4 – Squares diversity estimates of Devonian to Permian (a) genus (circles) and (b)  
641 species (triangles) richness, plotted at the midpoints of equal-length intervals.

642 Figure S1 – Size-based rarefaction curves for (a) Carboniferous genus-level occurrences,  
643 (b) Permian genus-level occurrences, (c) Carboniferous species-level occurrences, (d)  
644 Permian genus-level occurrences.

645 Figure S2 – Rank order abundance distributions of the sampled equal-length intervals  
646 (coloured correspond with the International Commission on Stratigraphy; ICS) at (a) genus-  
647 level occurrences and (b) species-level occurrences.

648 Figure S3 – Sample completeness (a-c, k-l) and coverage-based rarefaction curves (d-i) for  
649 Carboniferous (b, e, h, k) and Permian (c, f, i, l) intervals. Solid lines are interpolated  
650 measures, points are observed data and dotted lines are extrapolated estimates.  
651 Carboniferous intervals are in green and Permian intervals are in red according to the ICS  
652 colours.

653 Figure S4 – Estimates of Carboniferous and Permian actinopterygian diversity using size-  
654 based (classical) rarefaction of (a) occurrences of genera and (b) occurrences of species,  
655 showing estimates for different sample sizes.

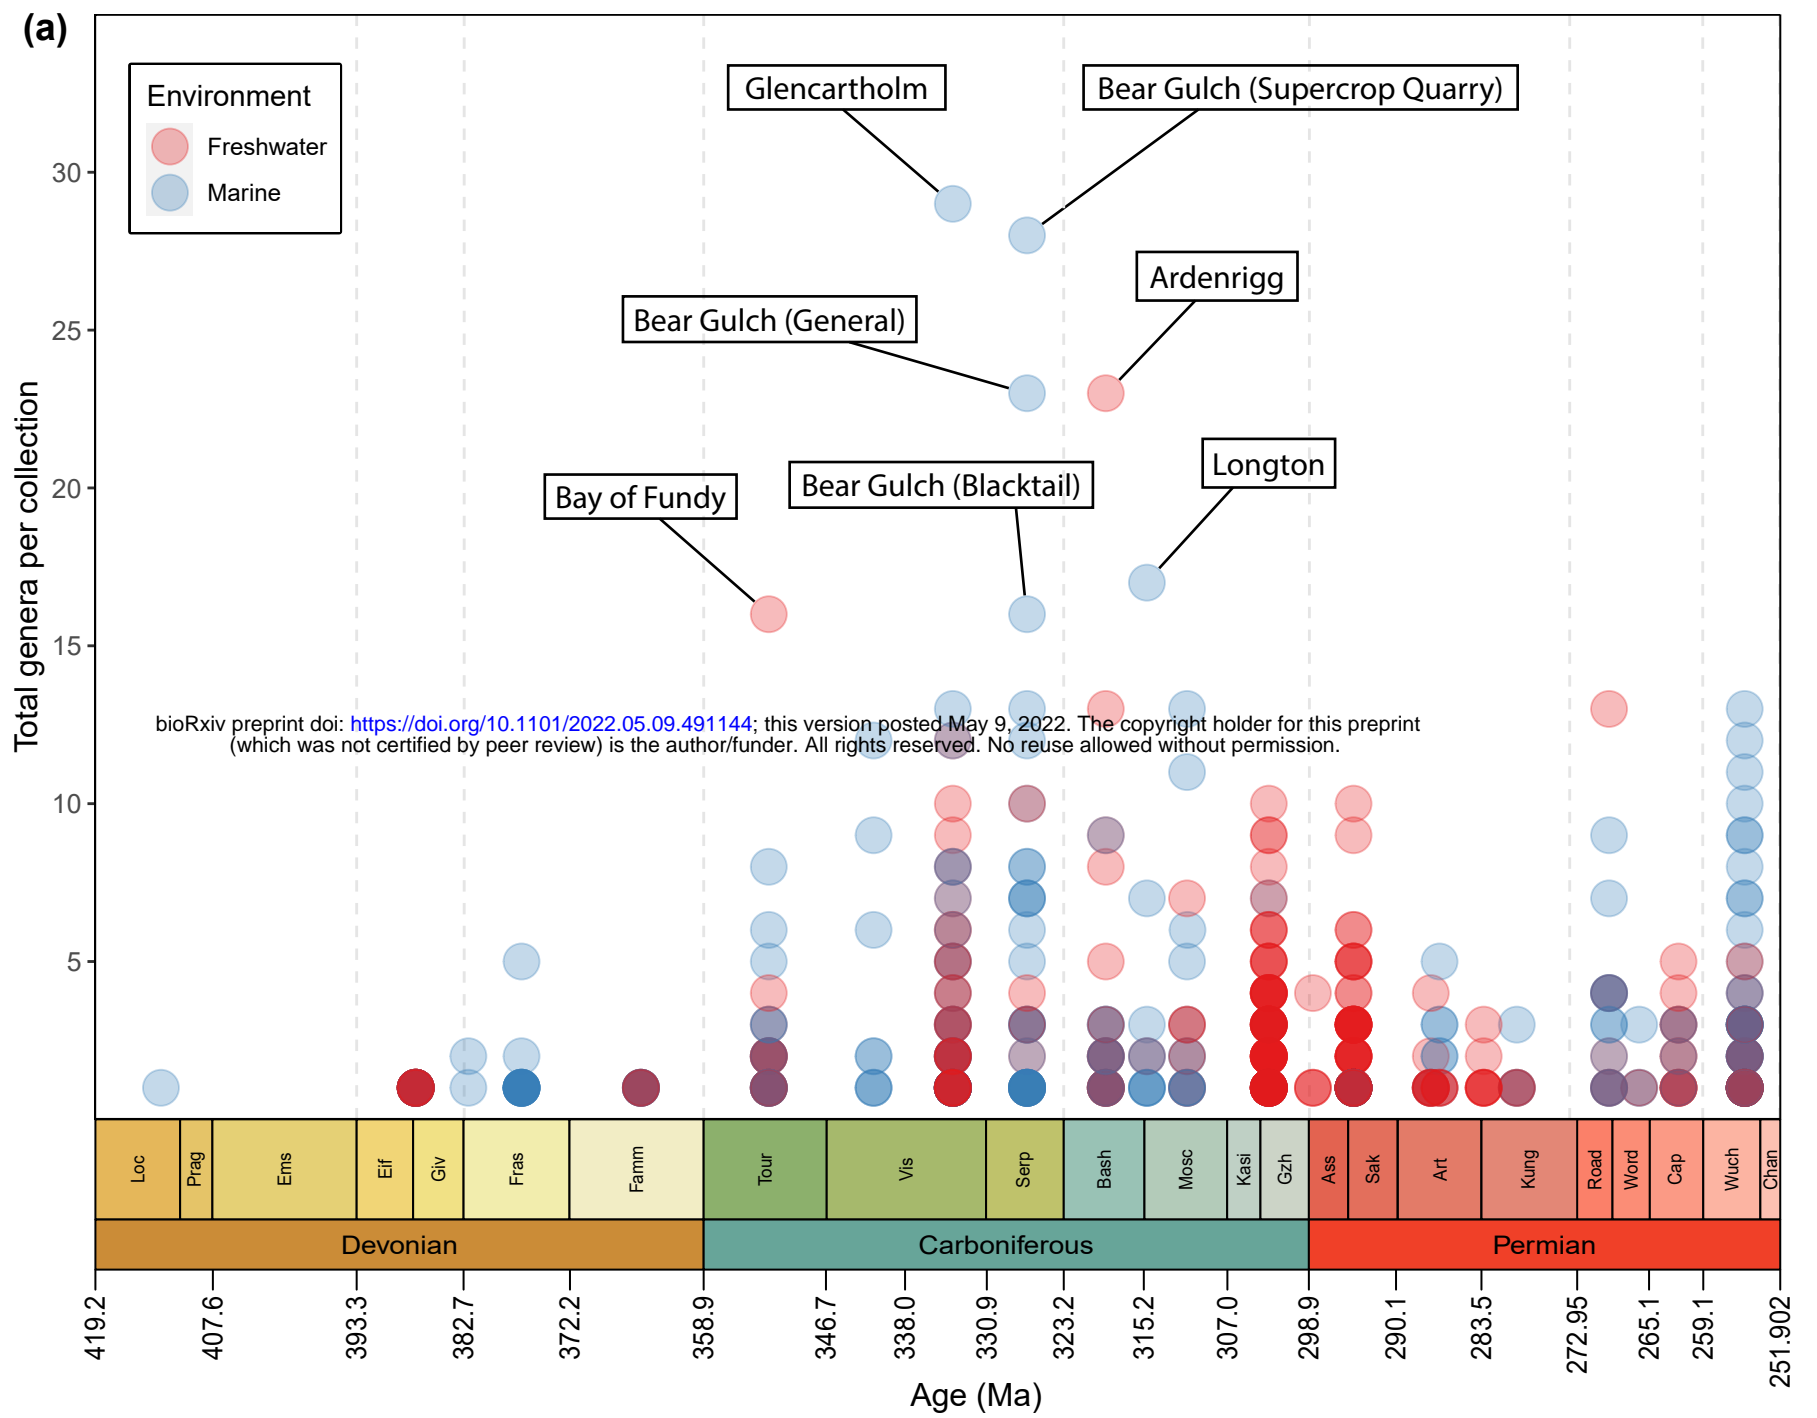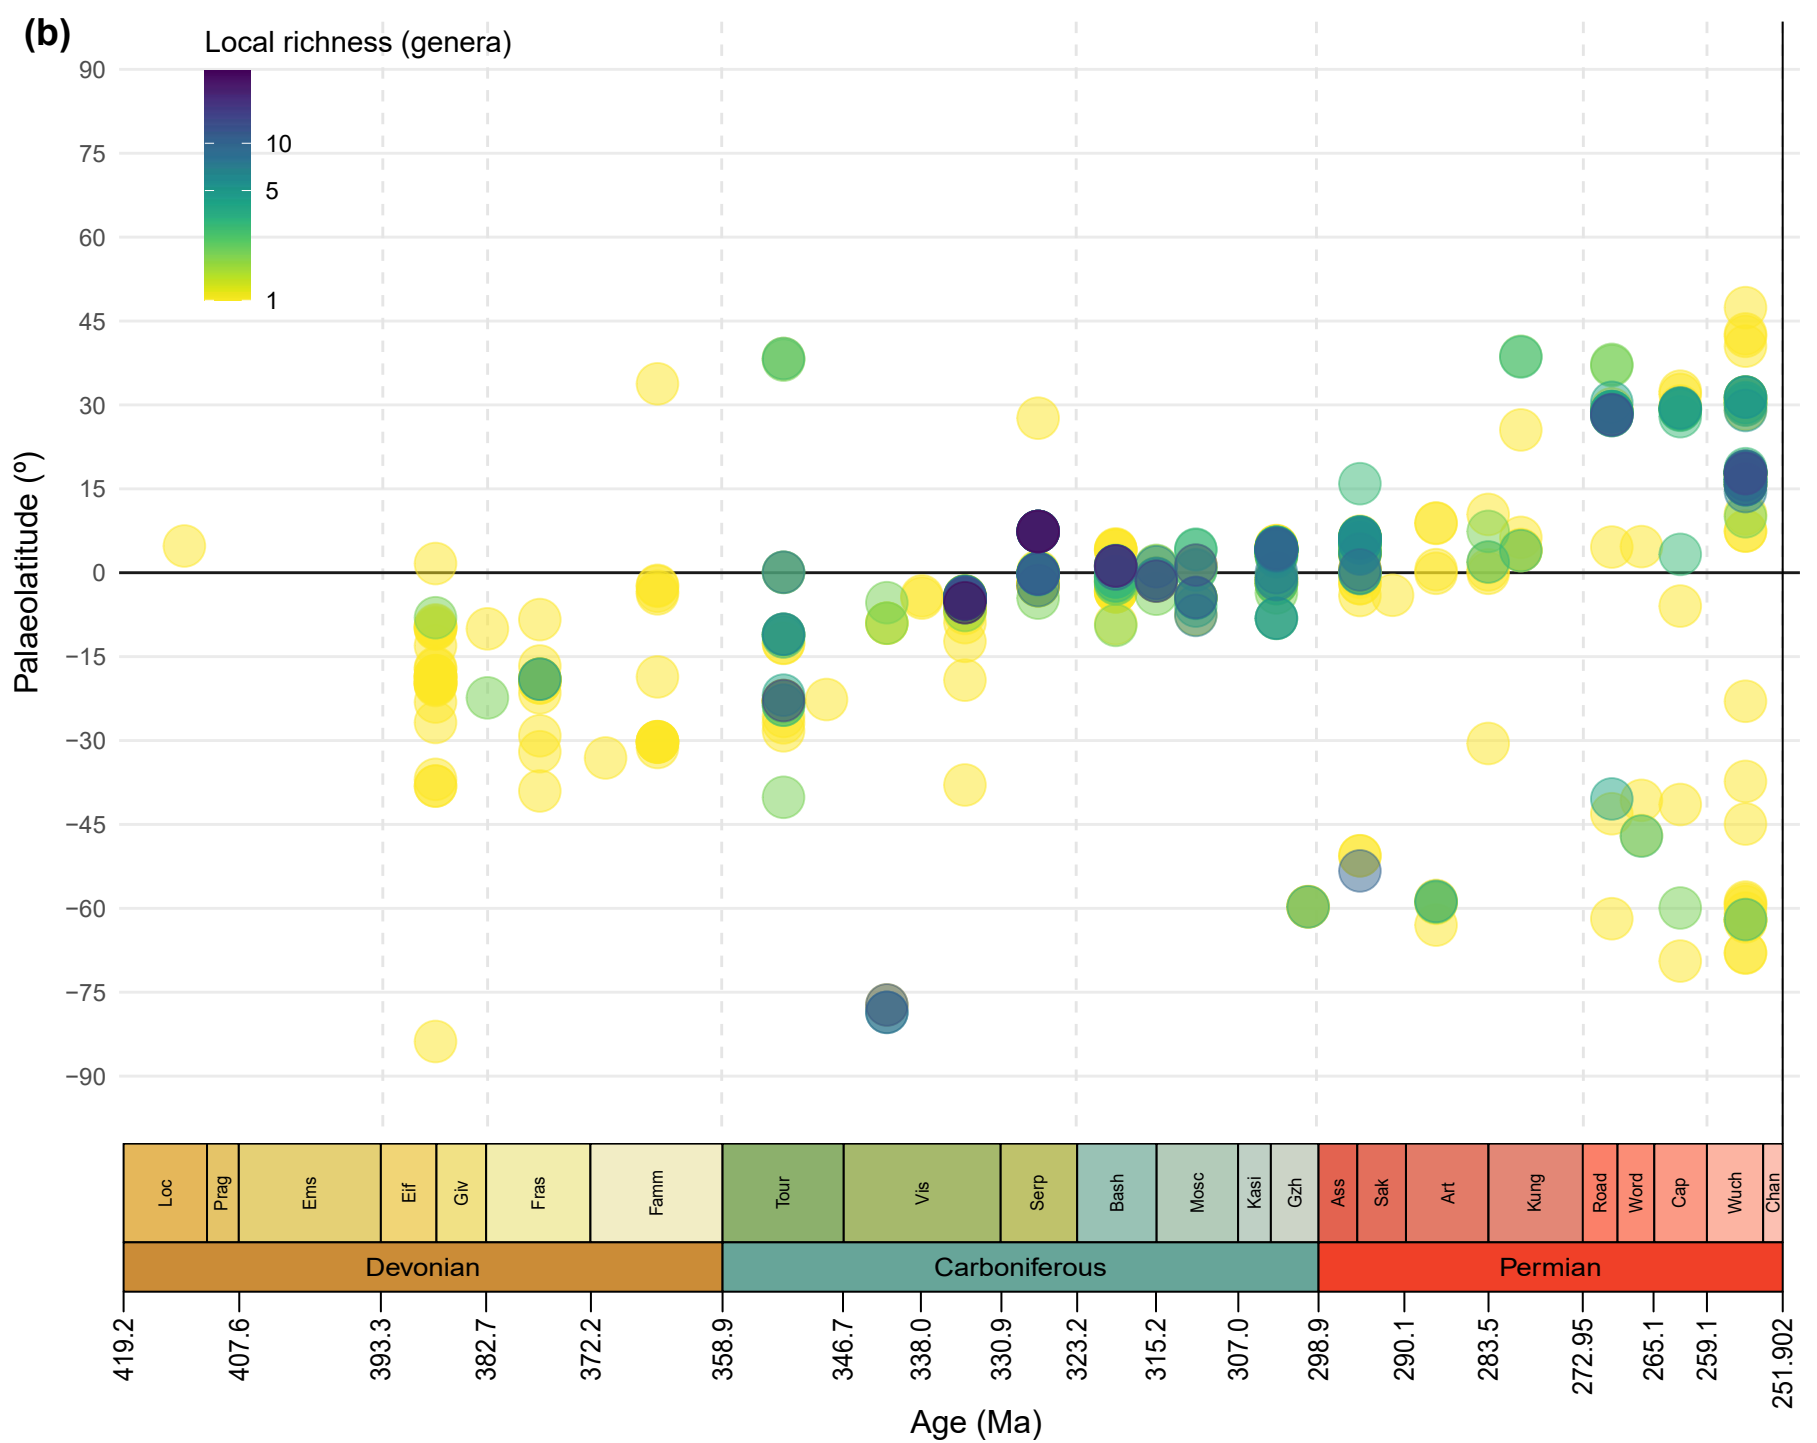



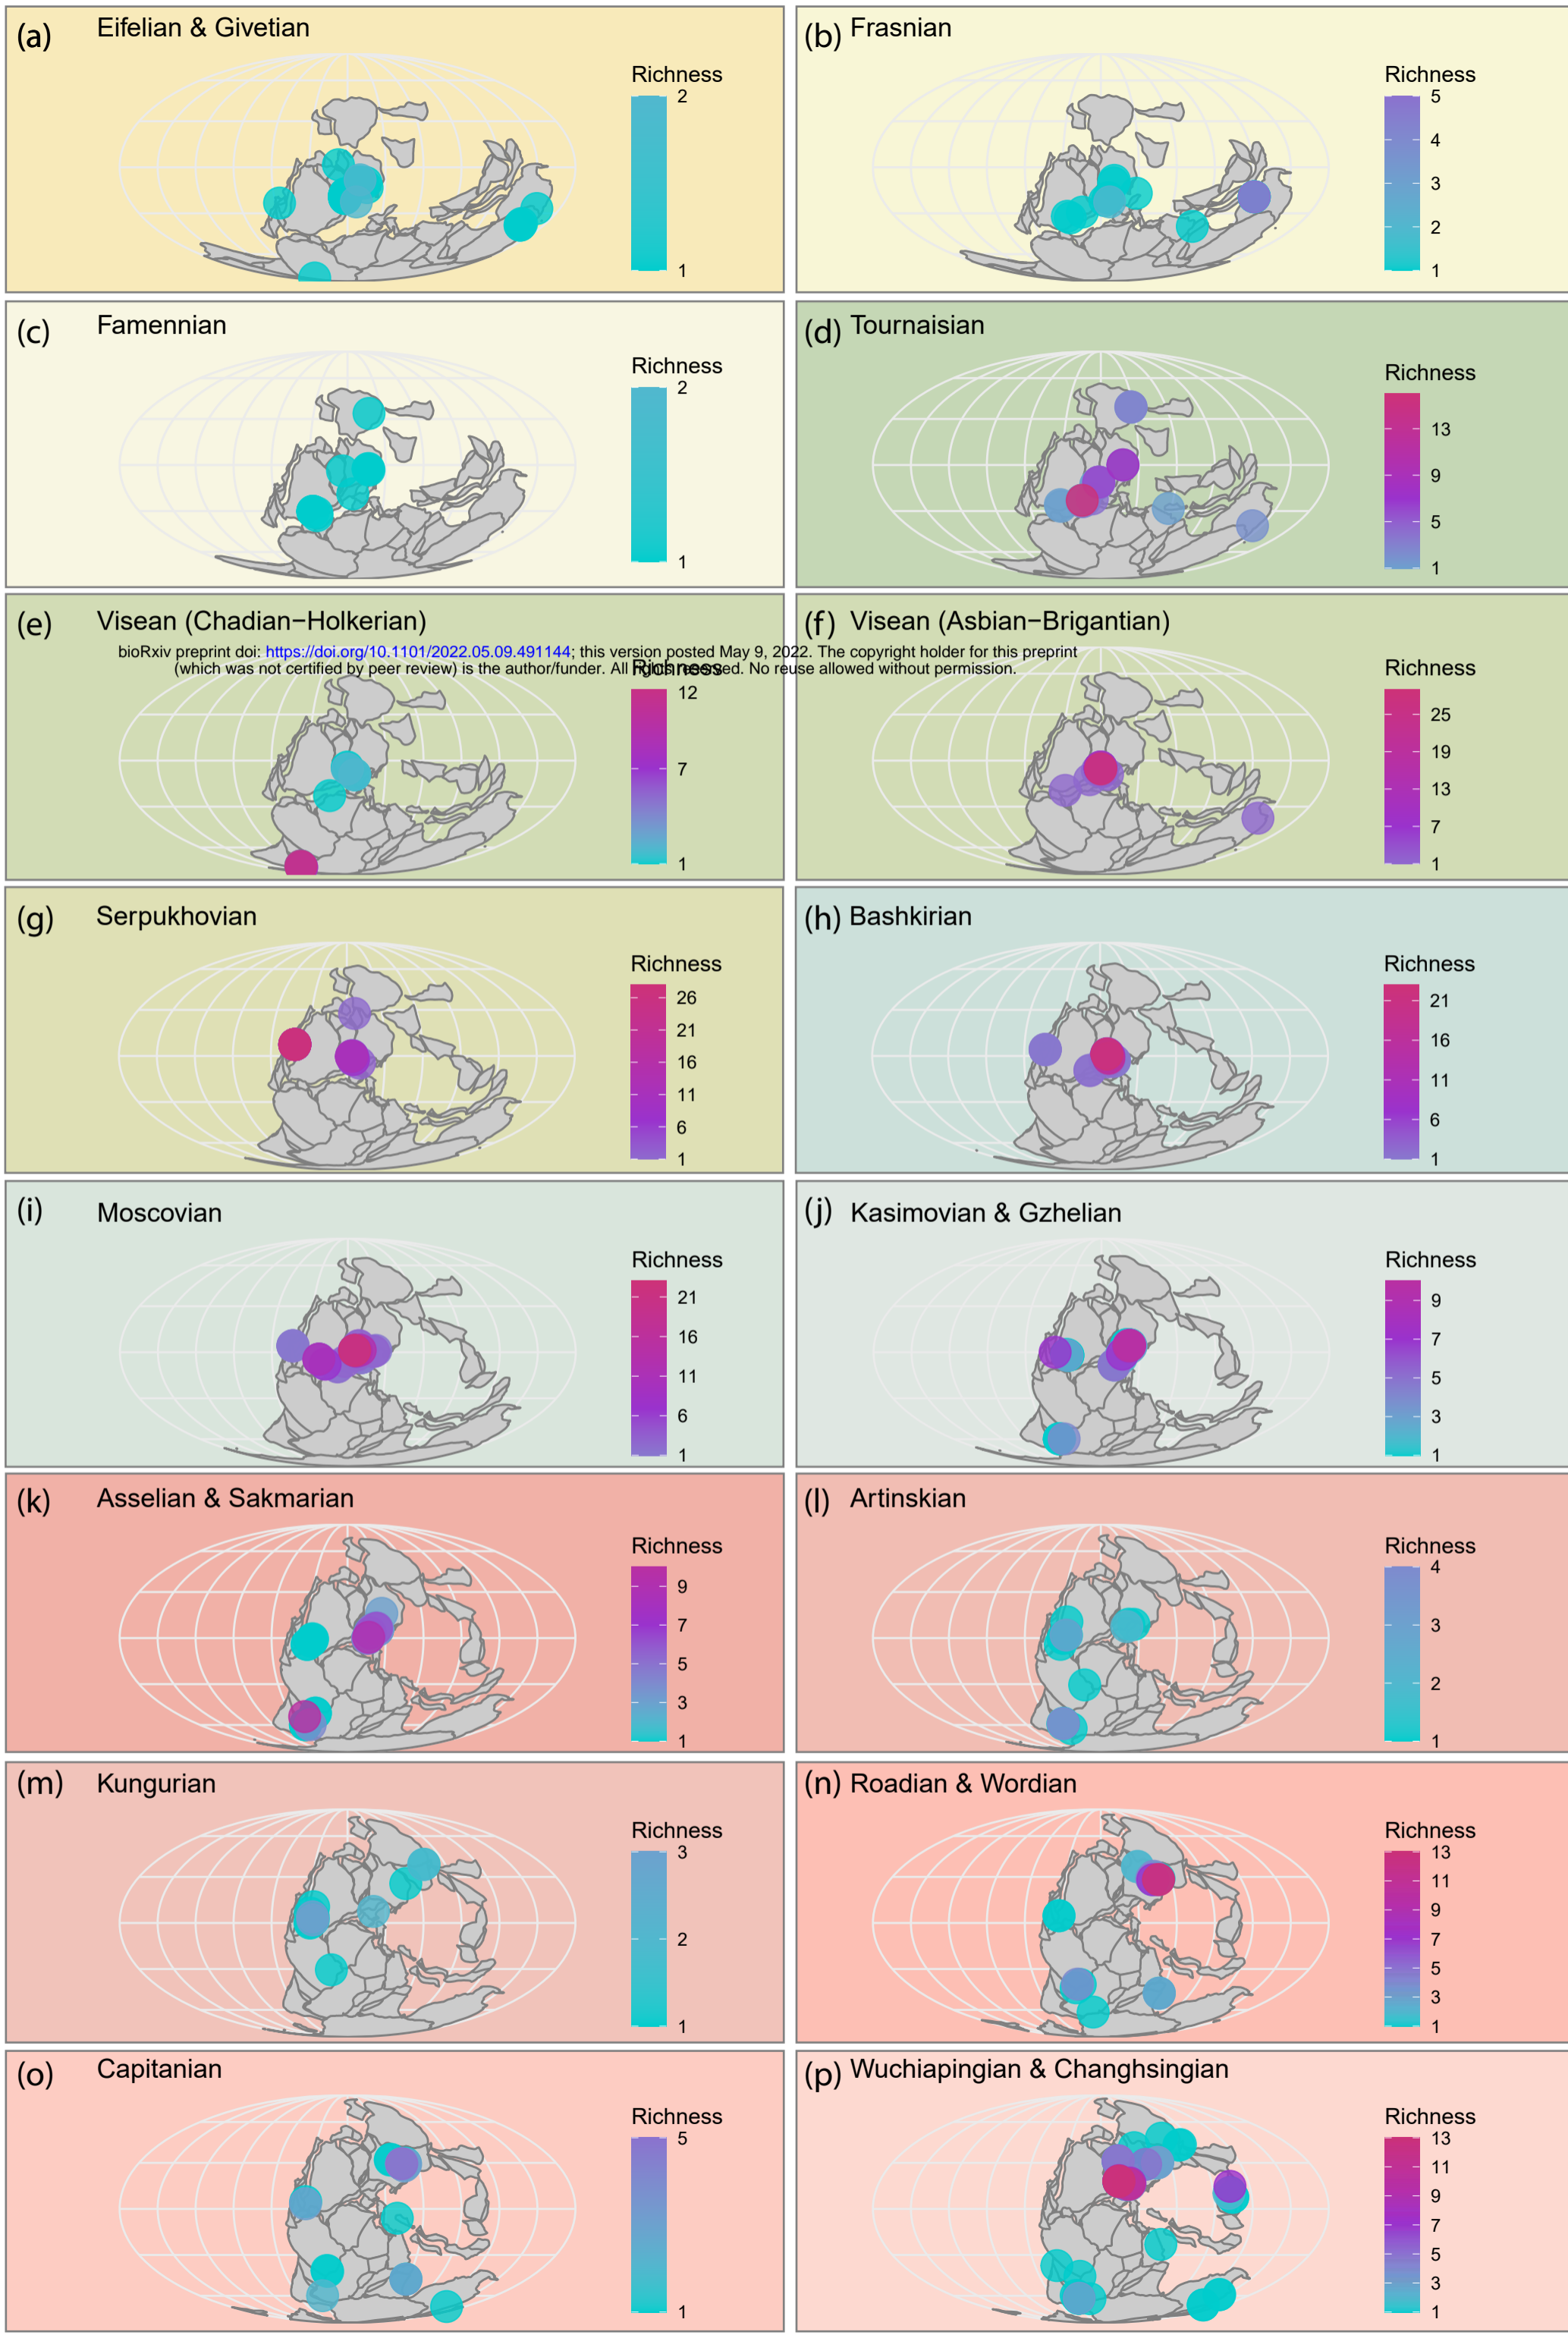

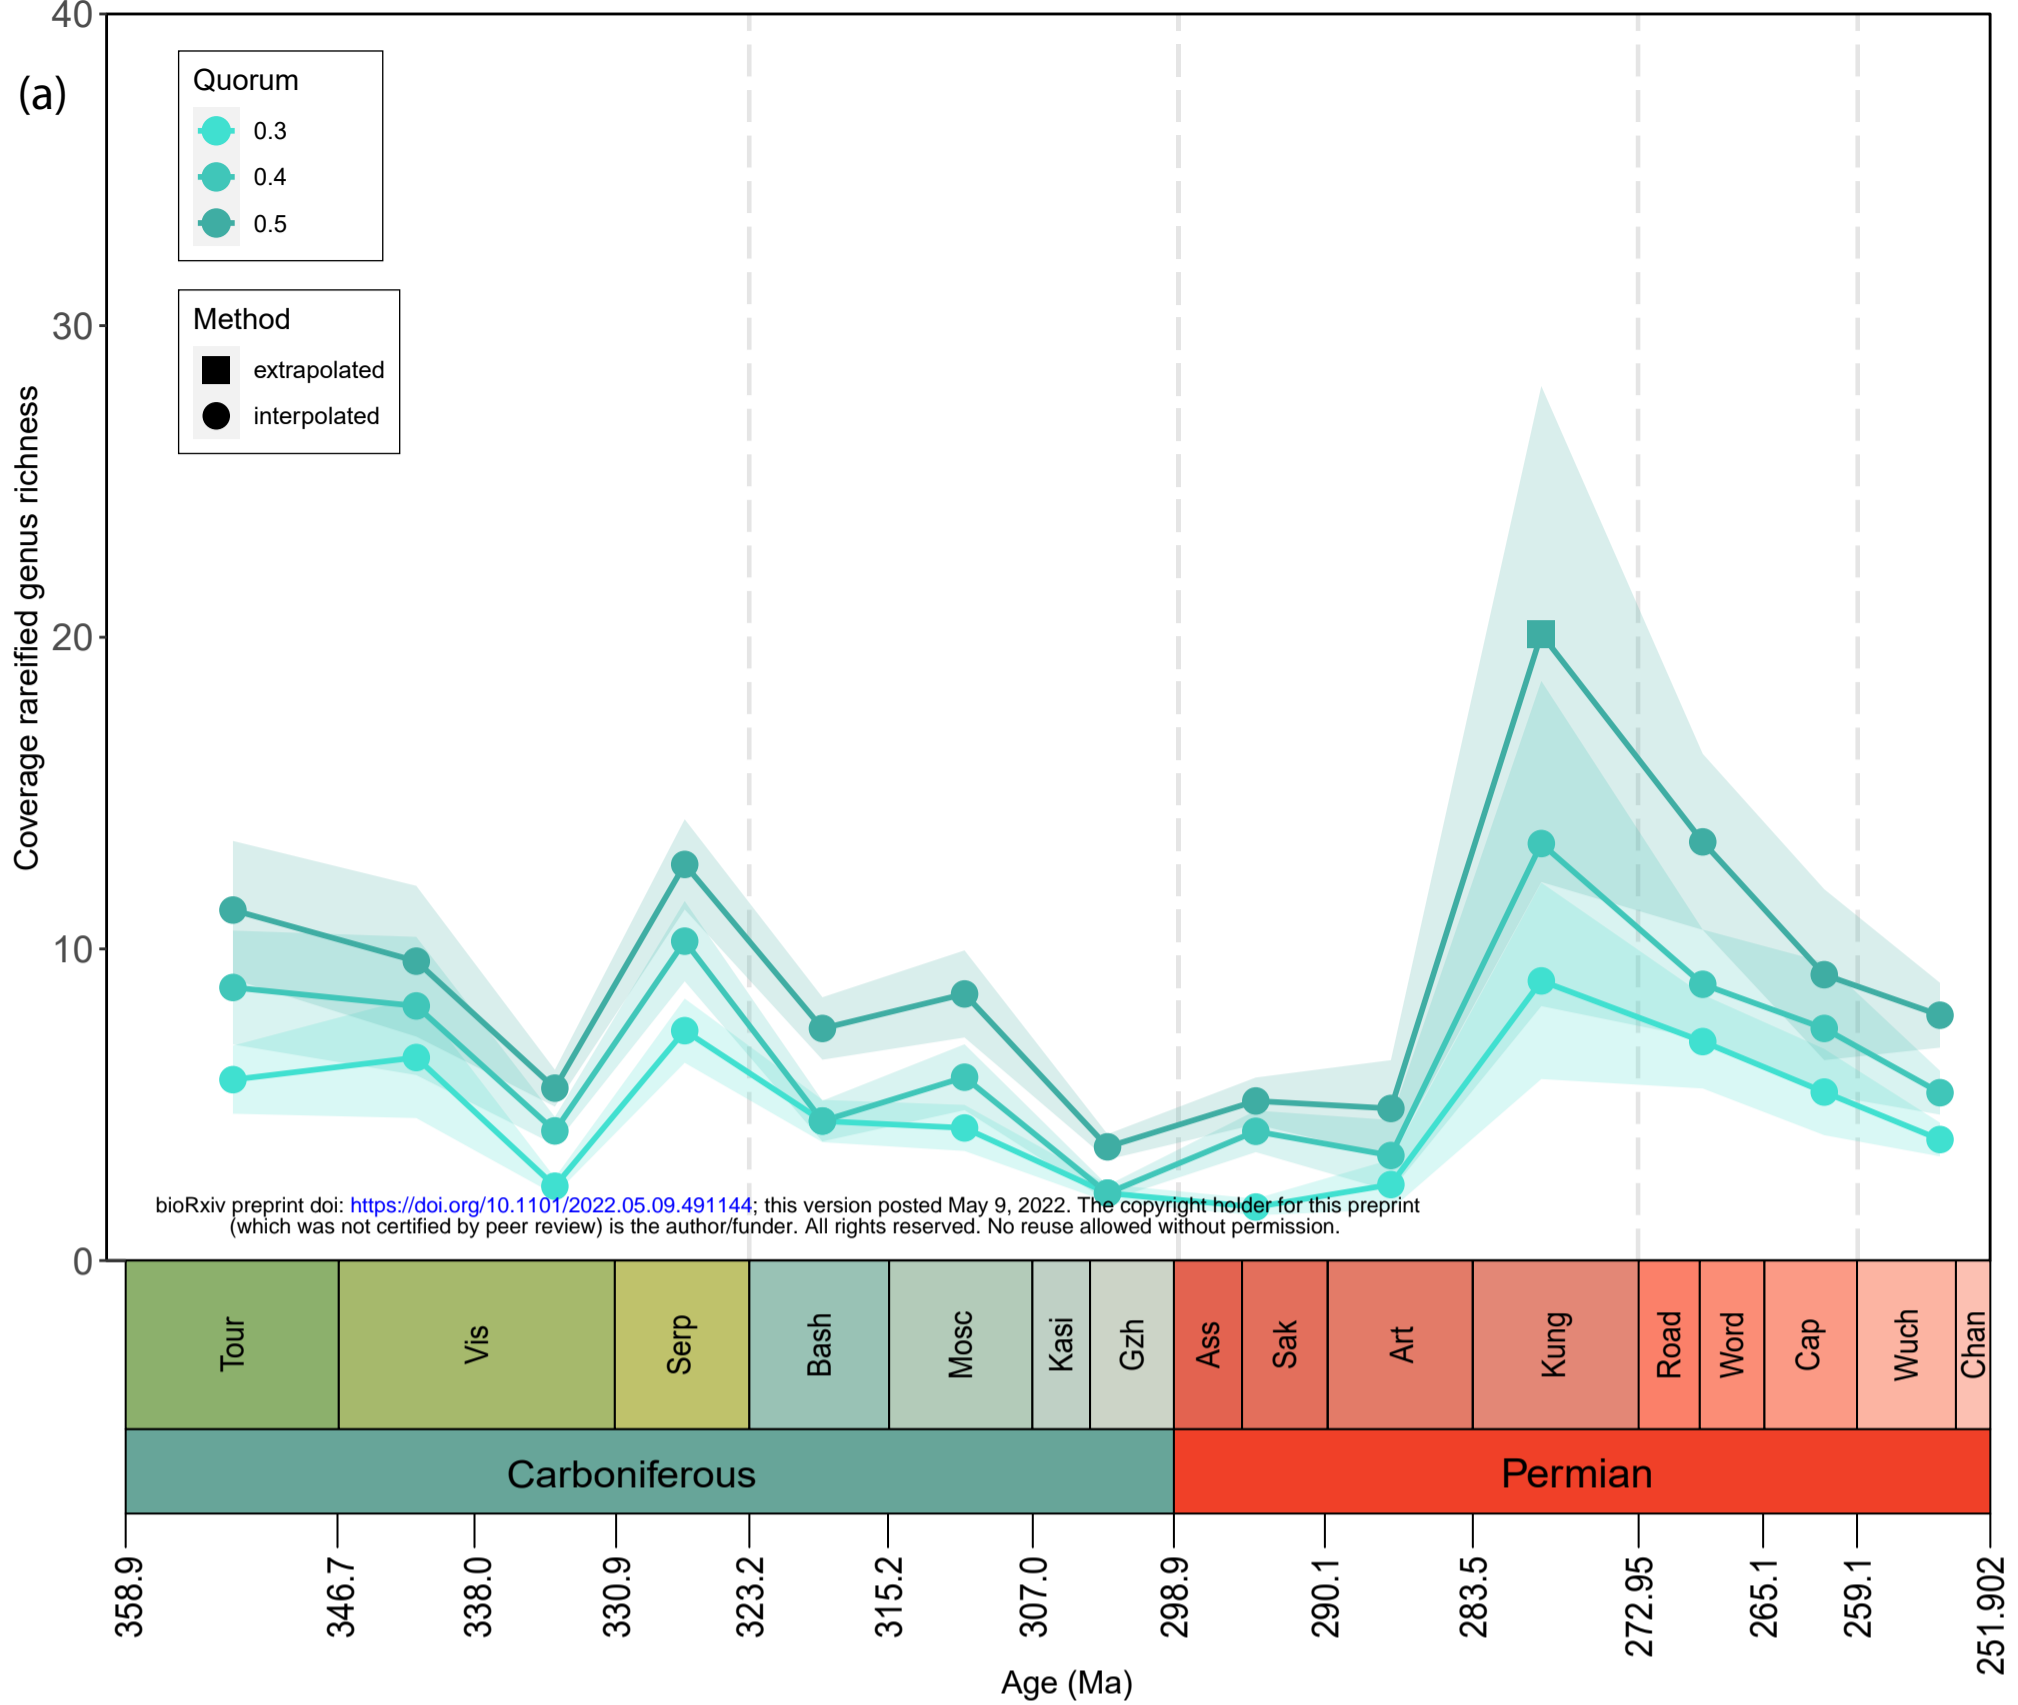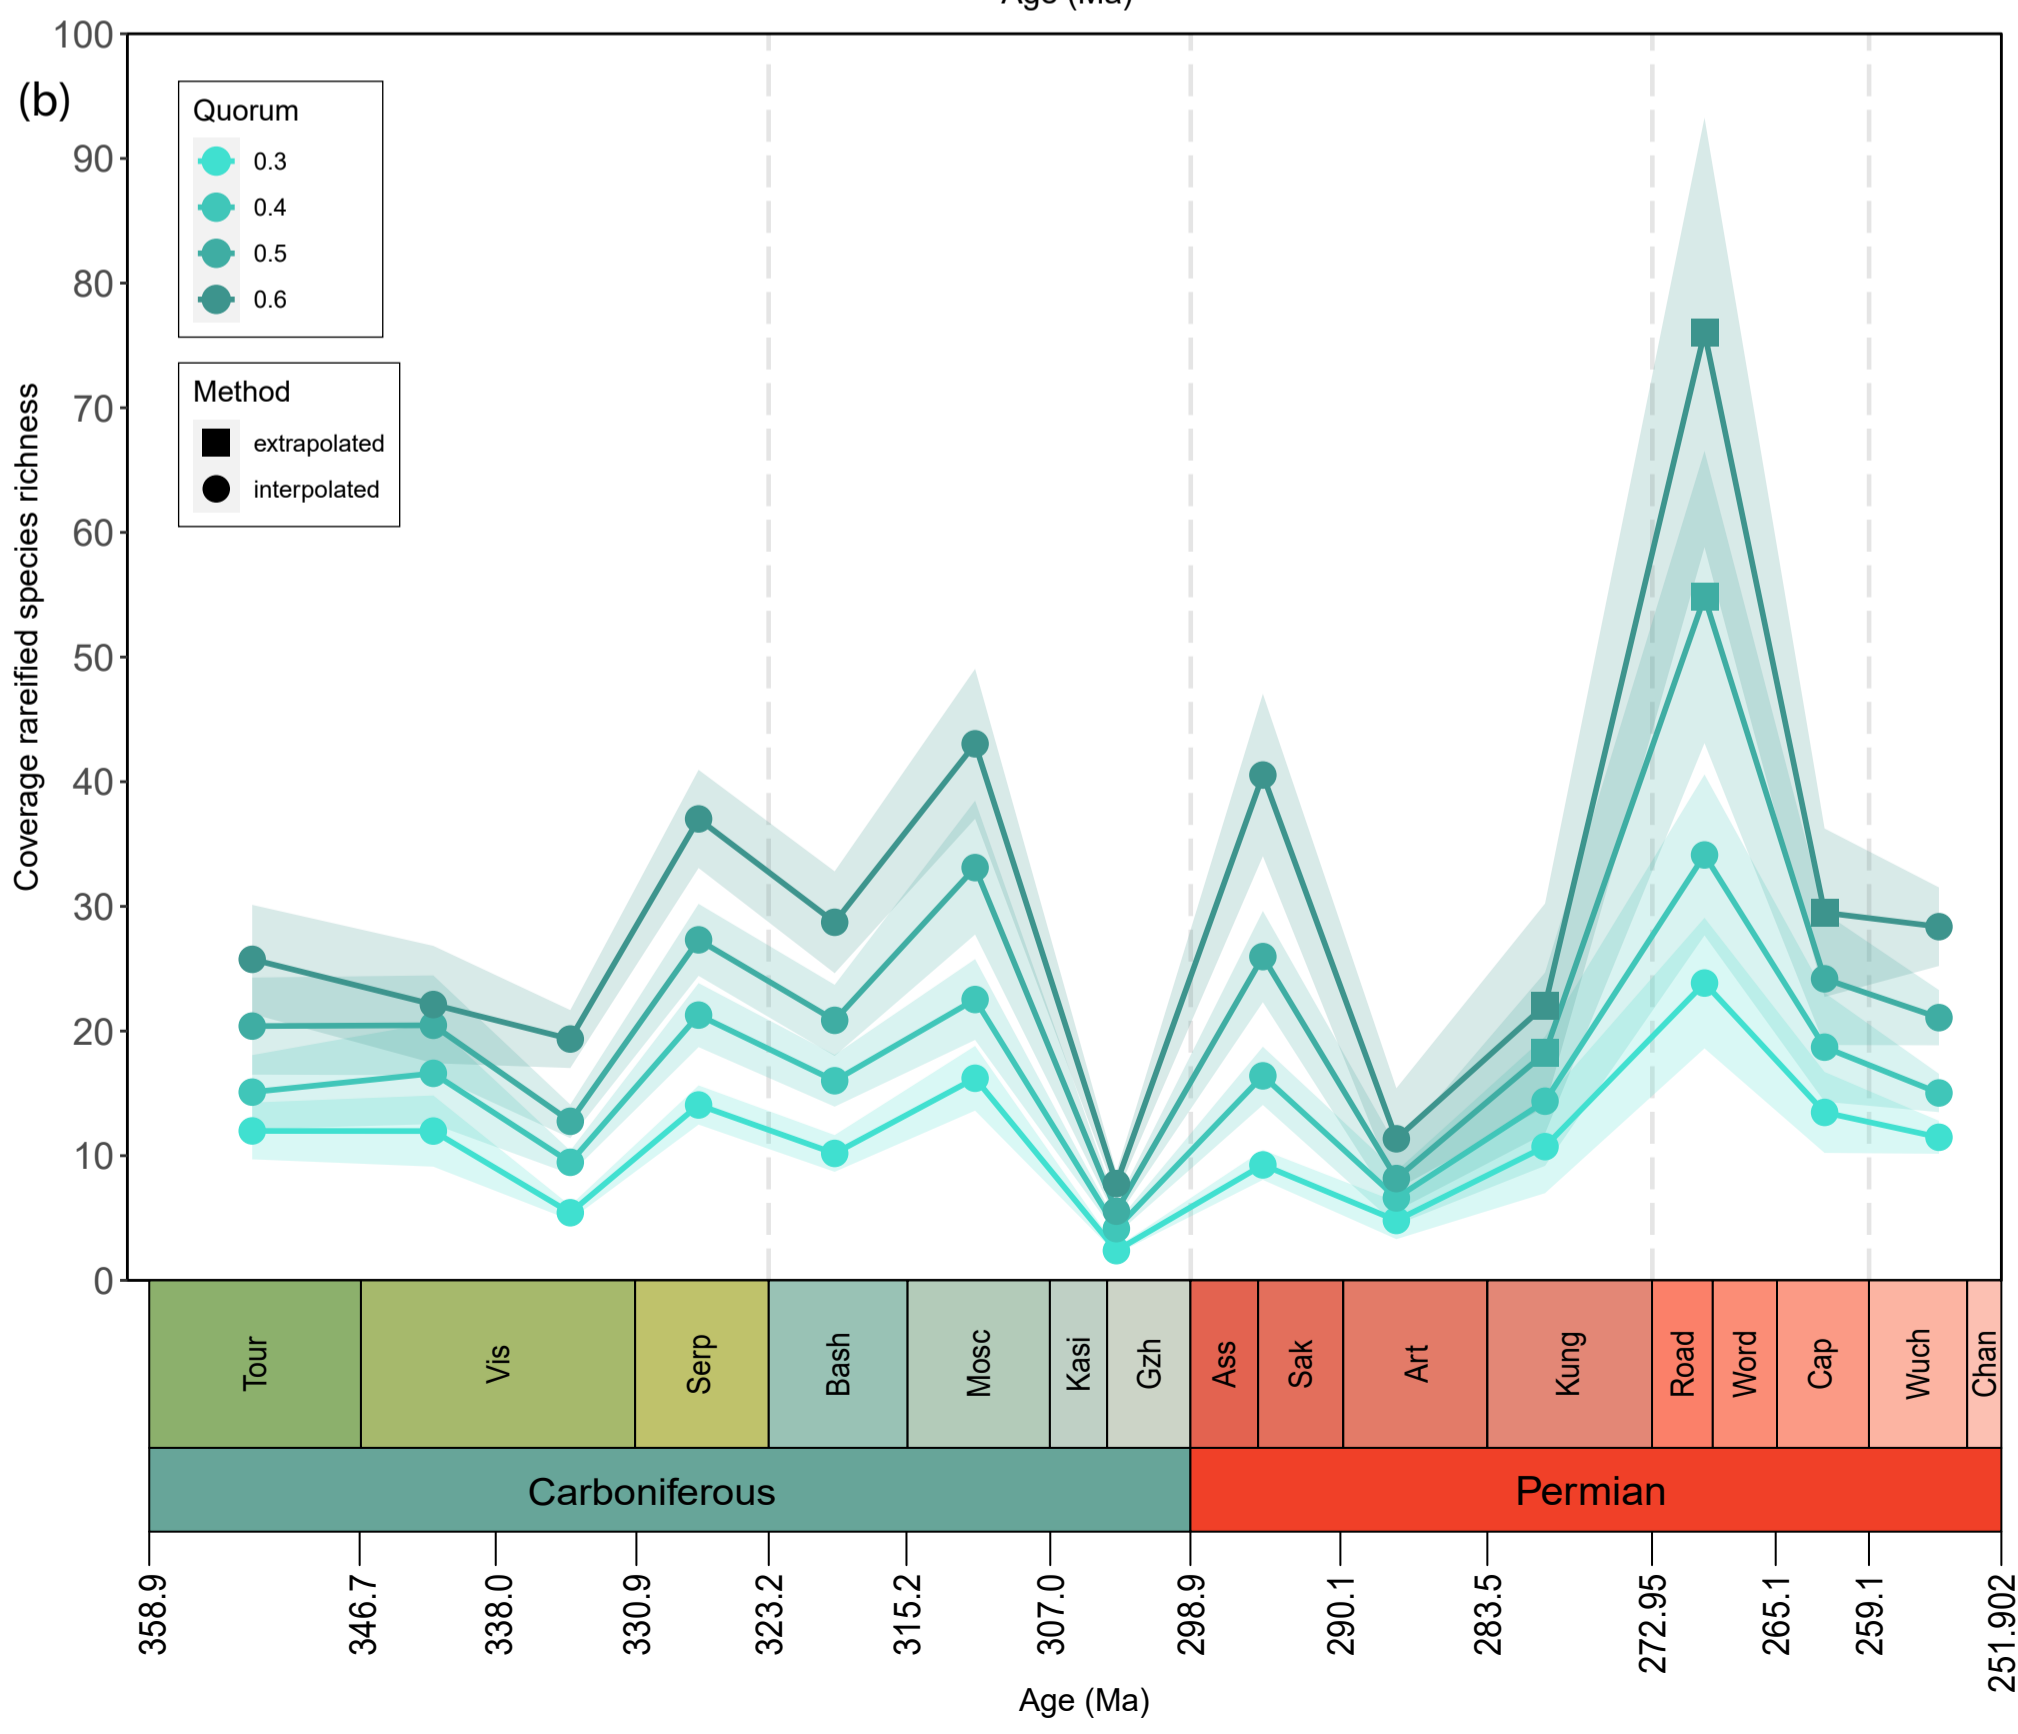

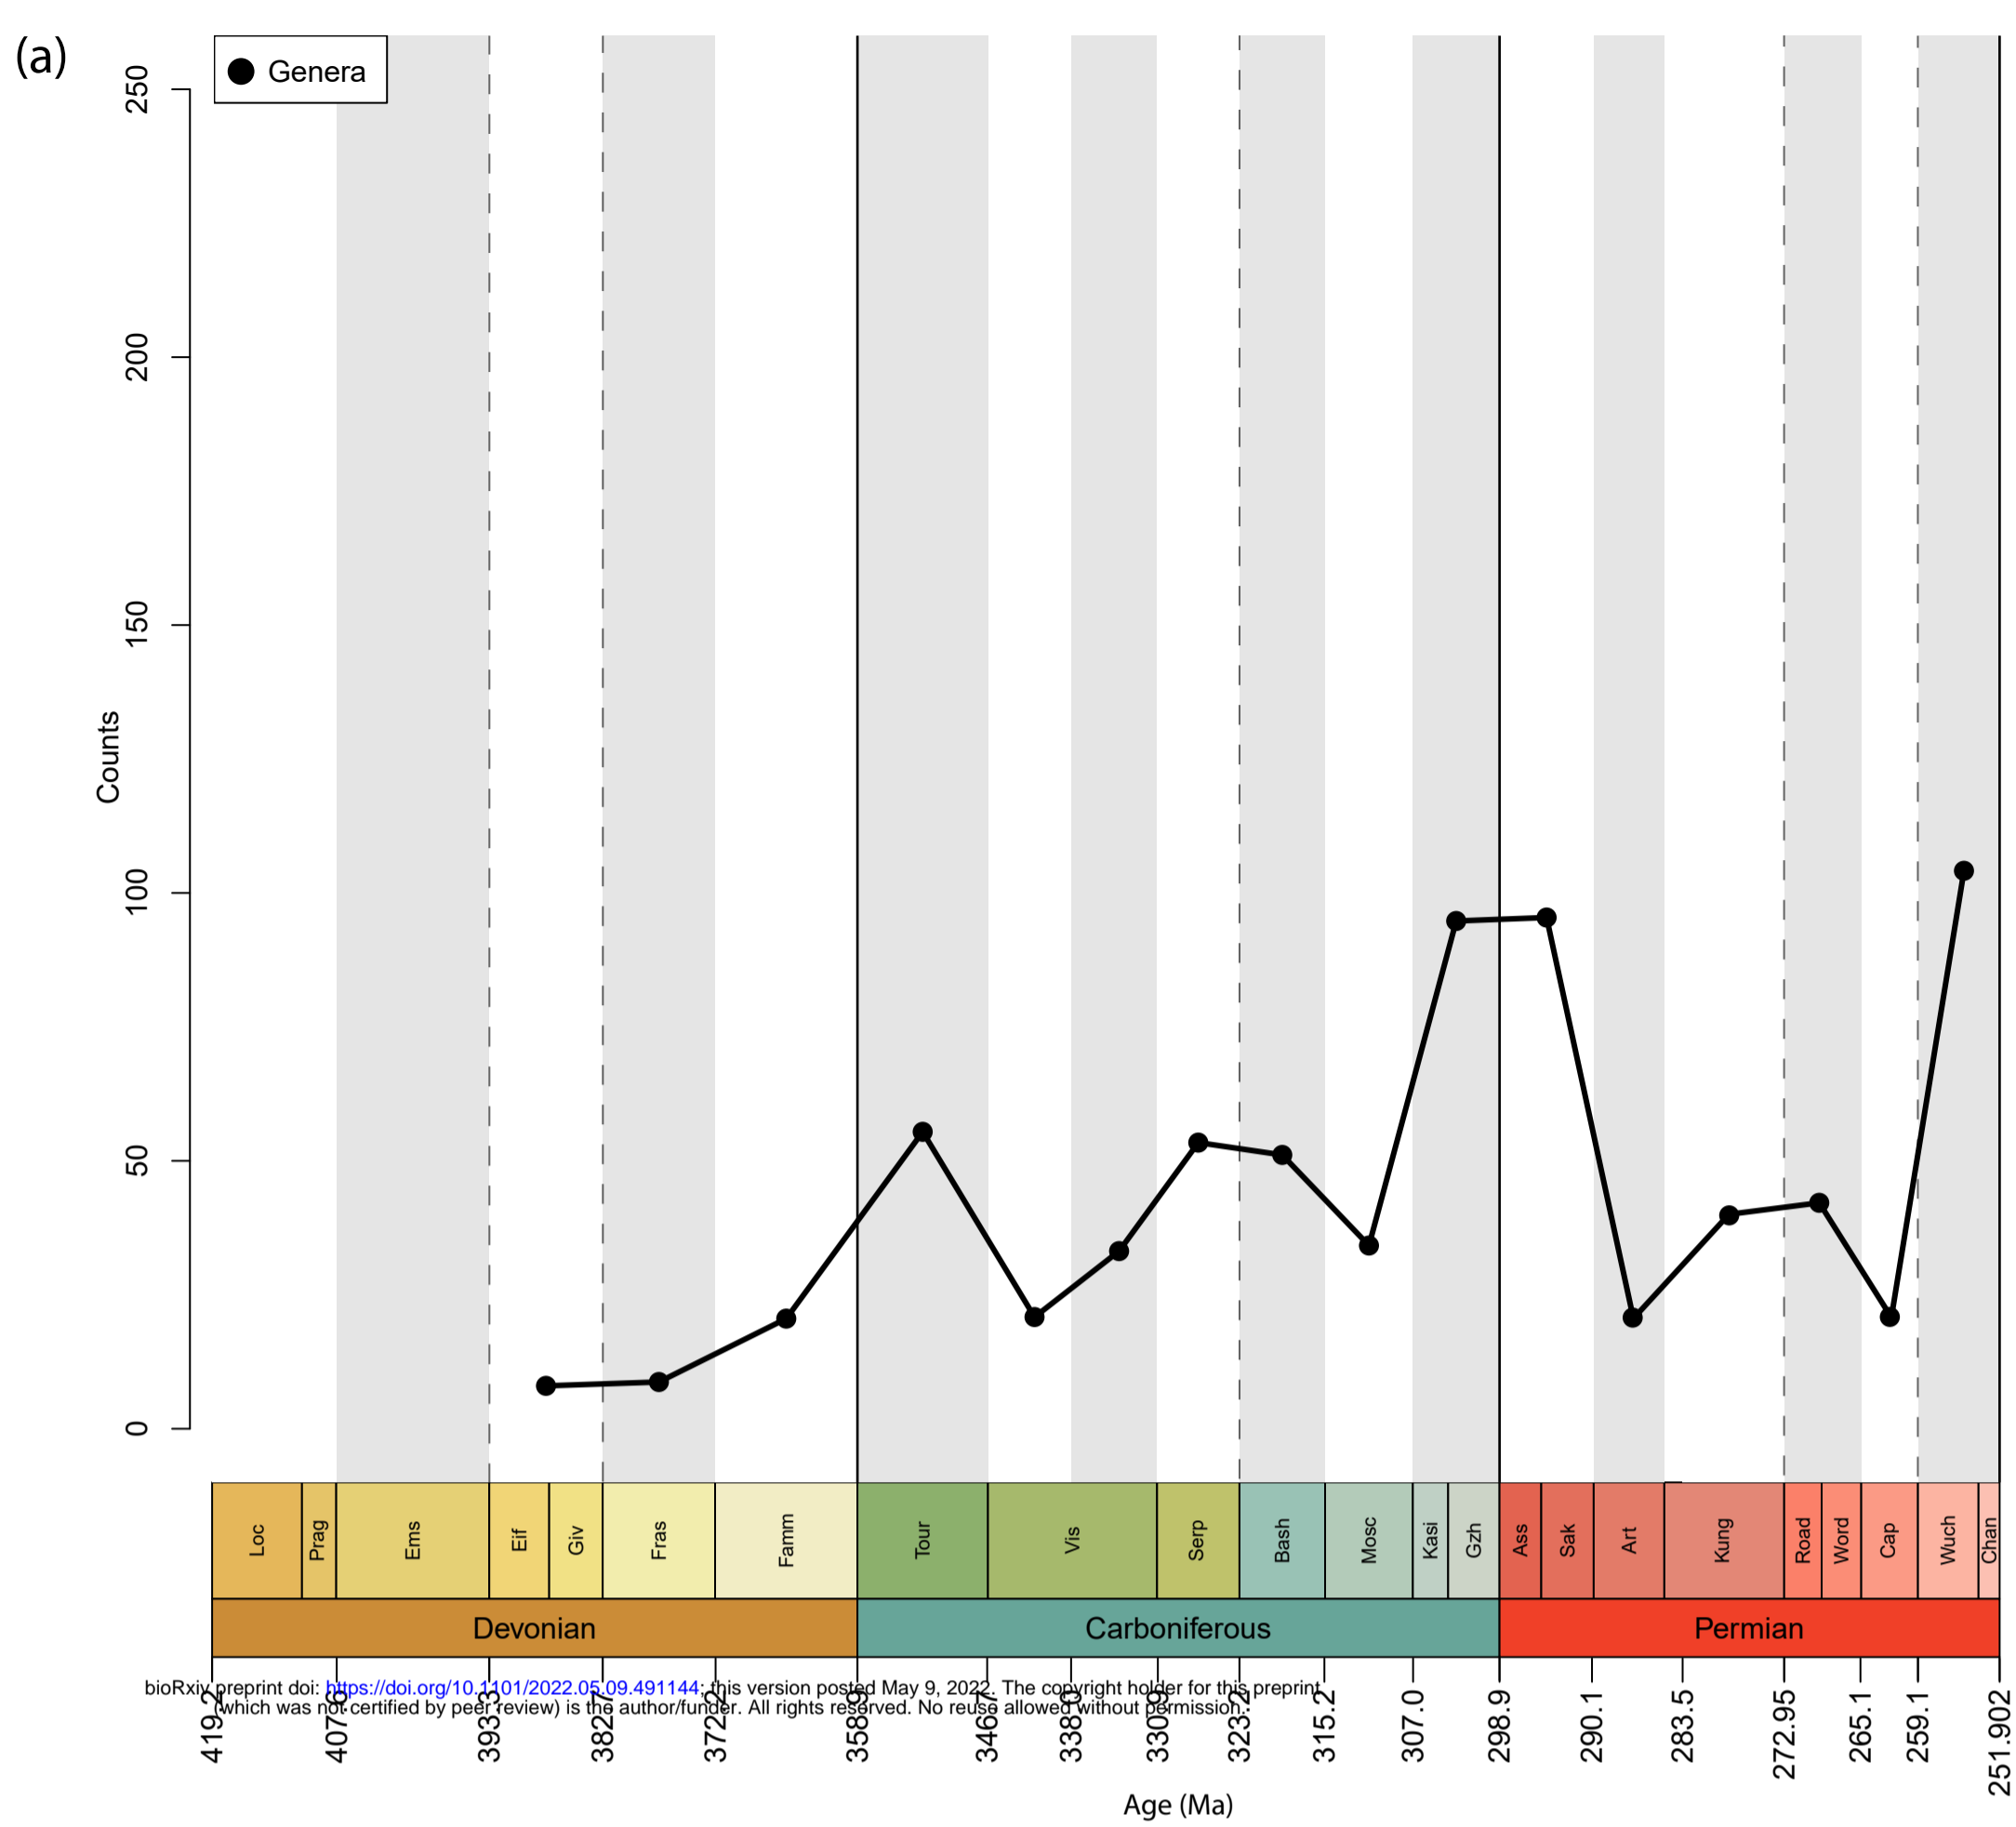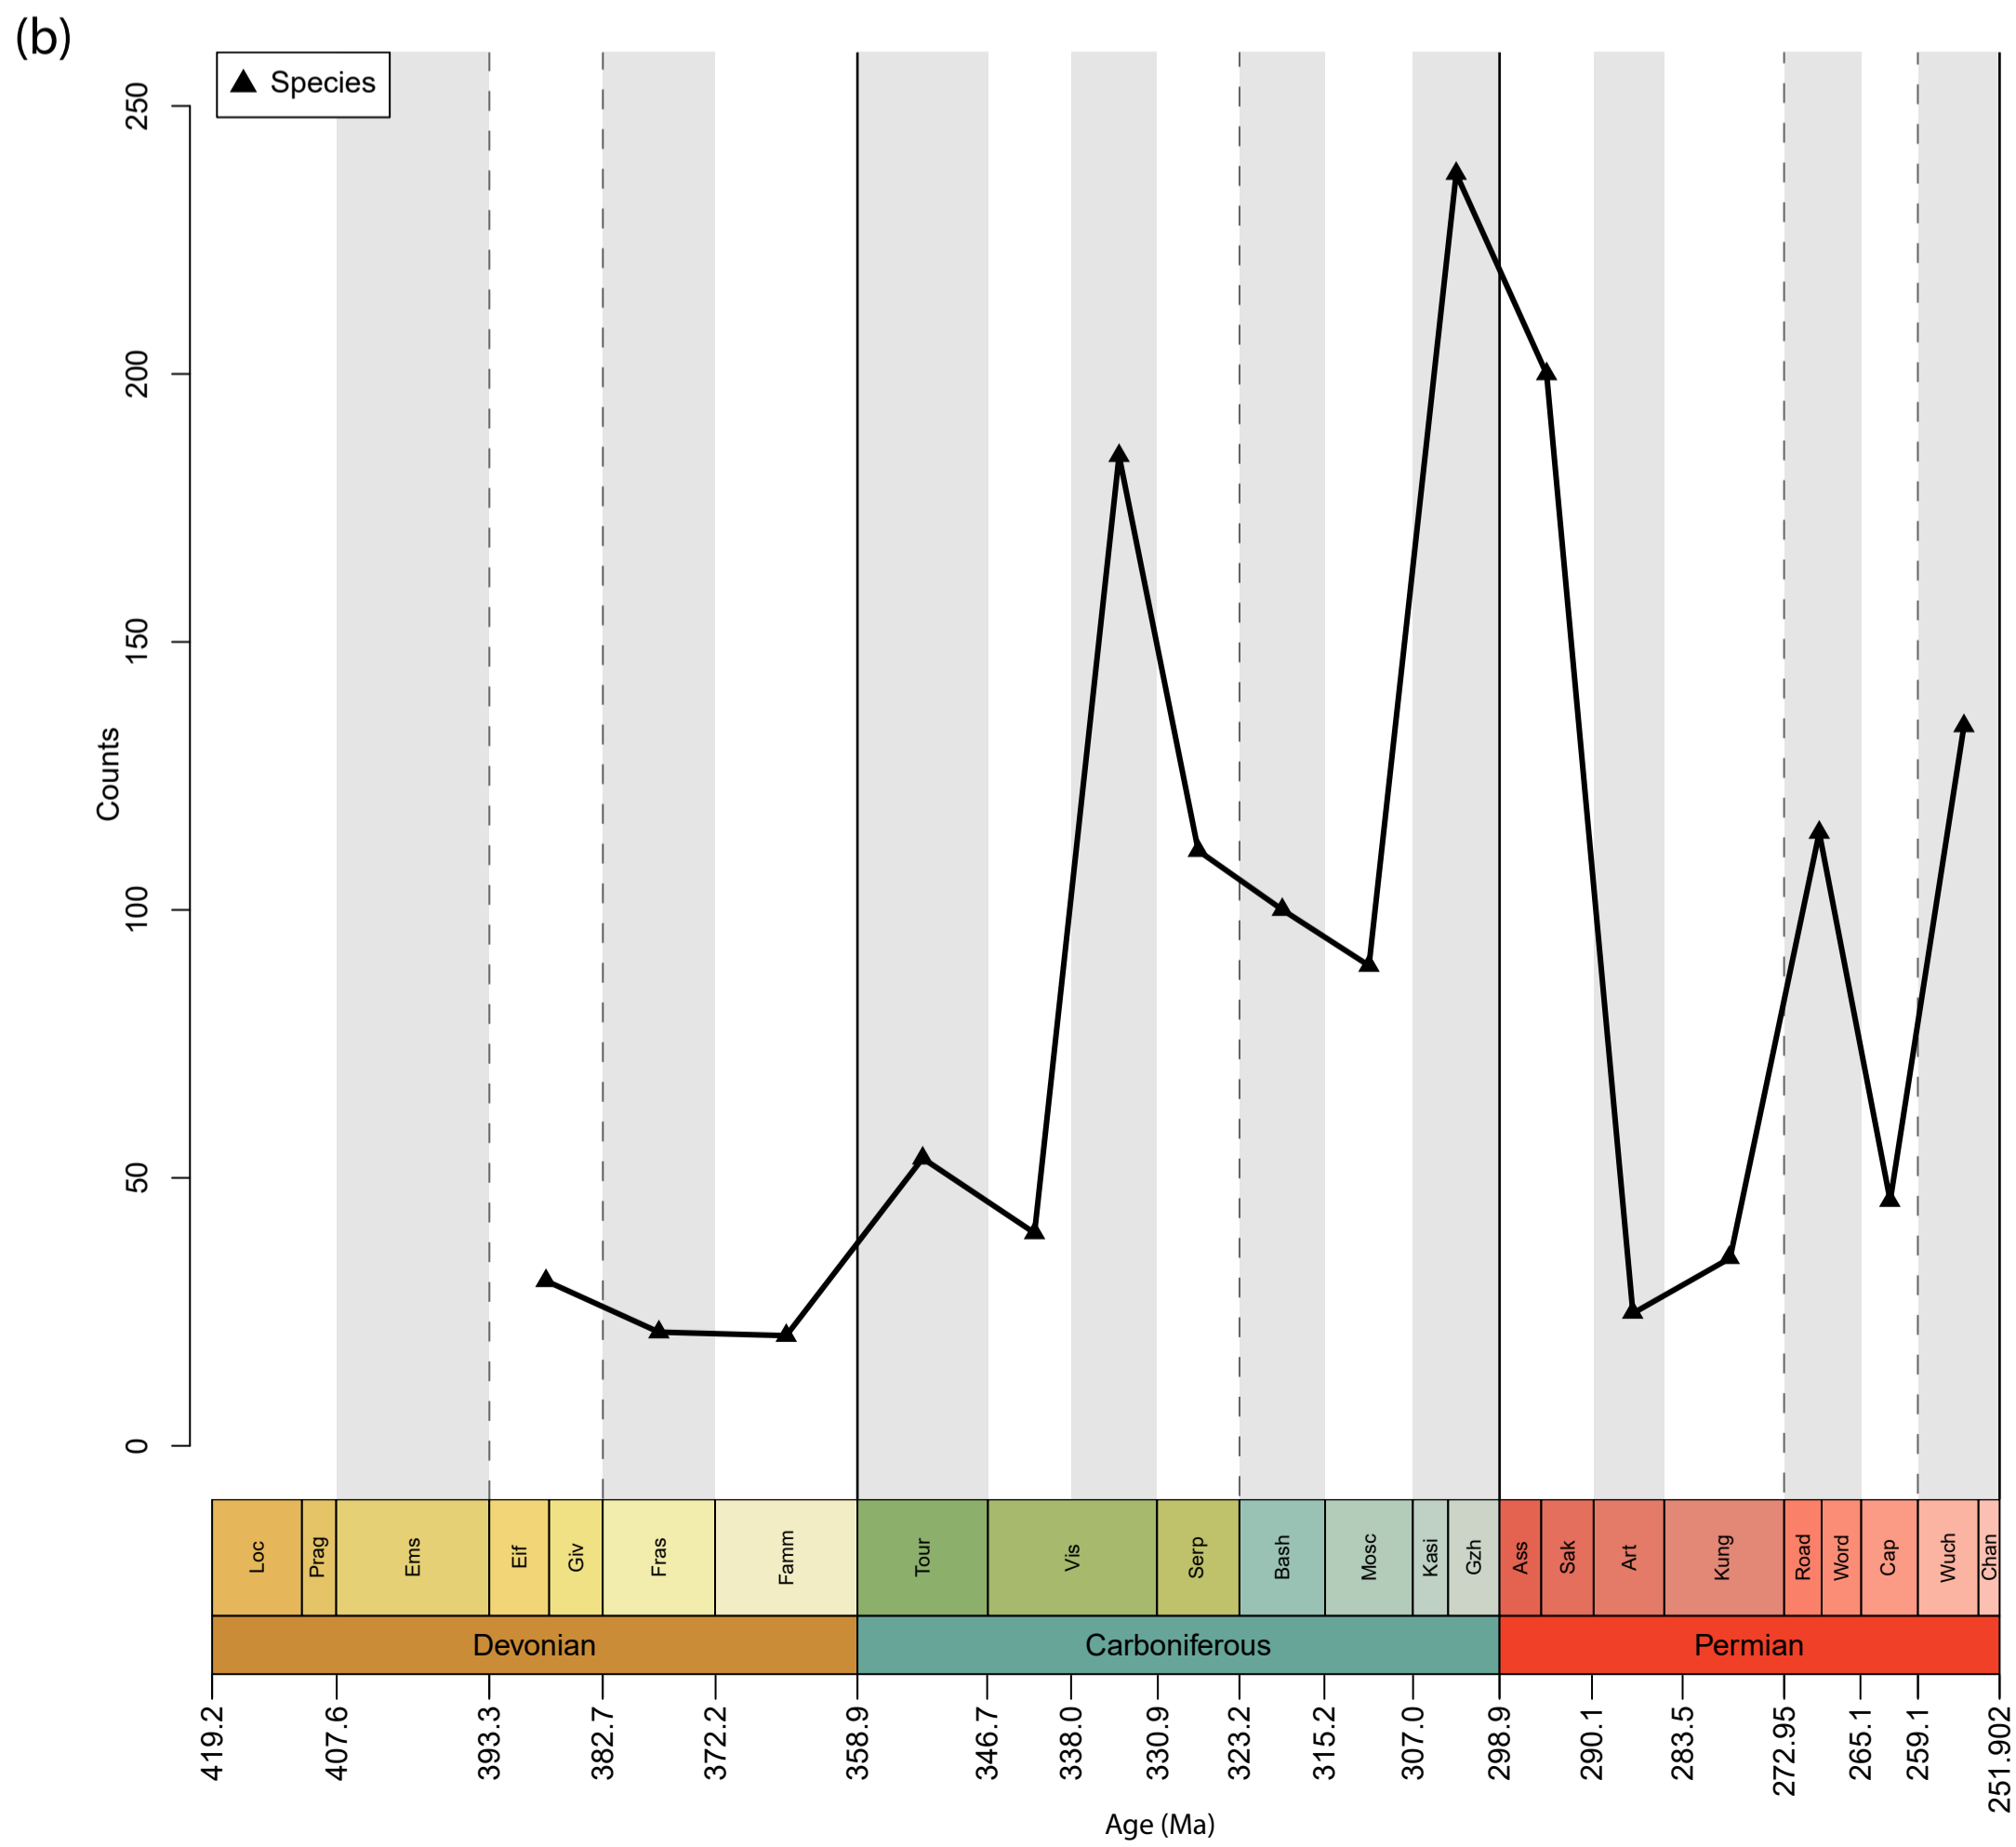

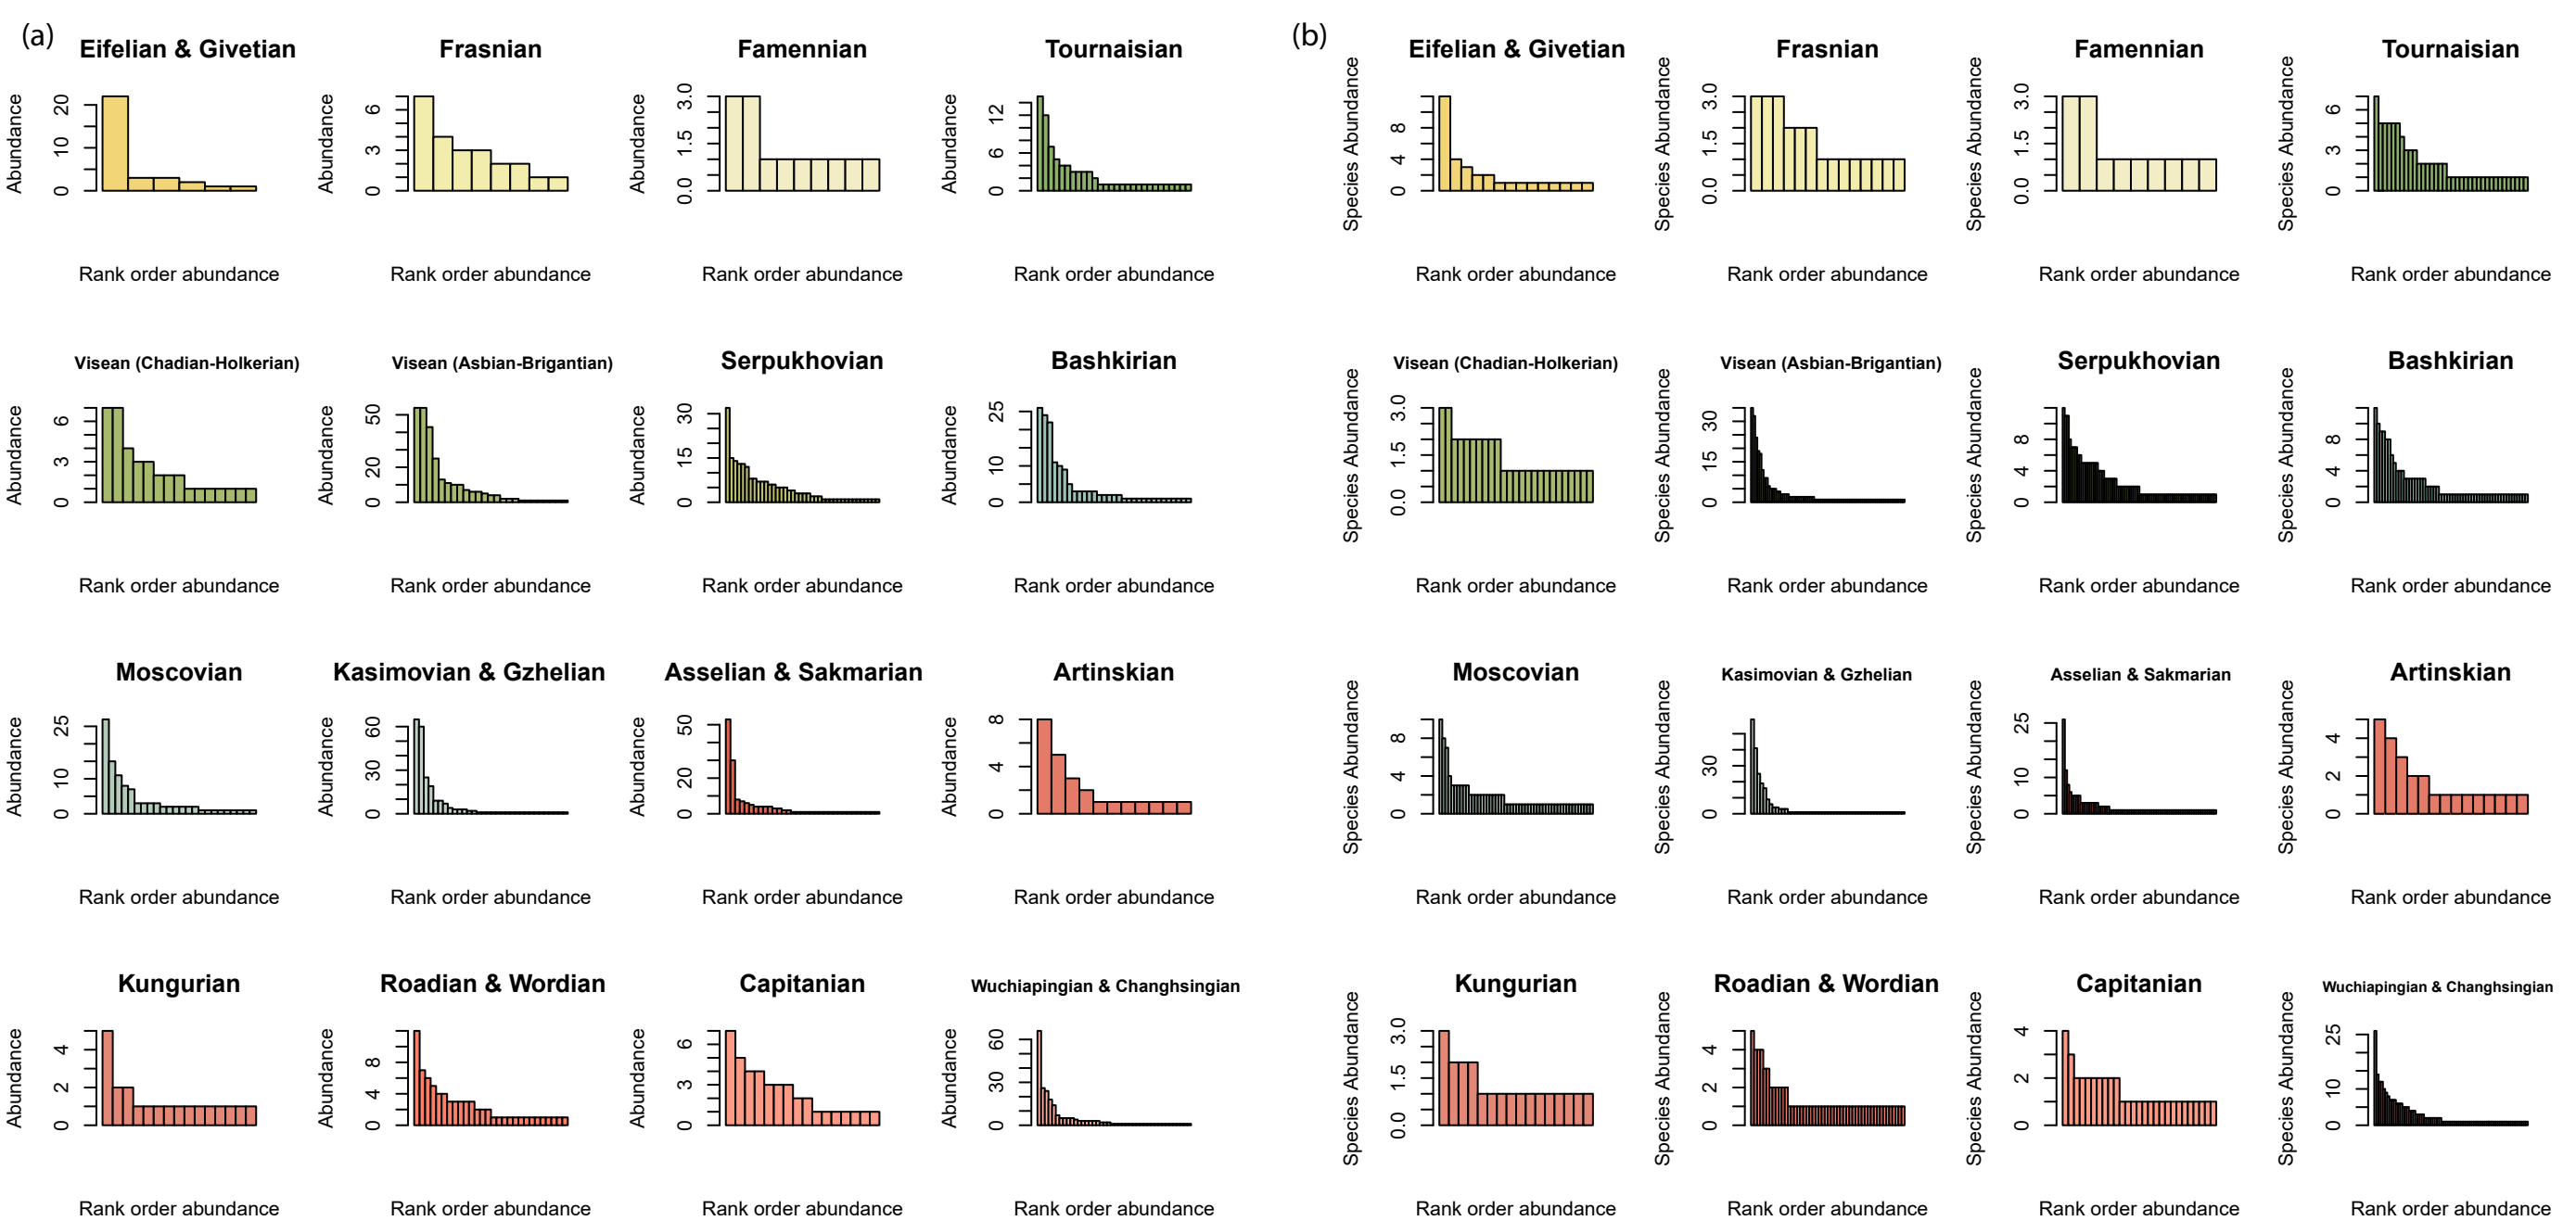

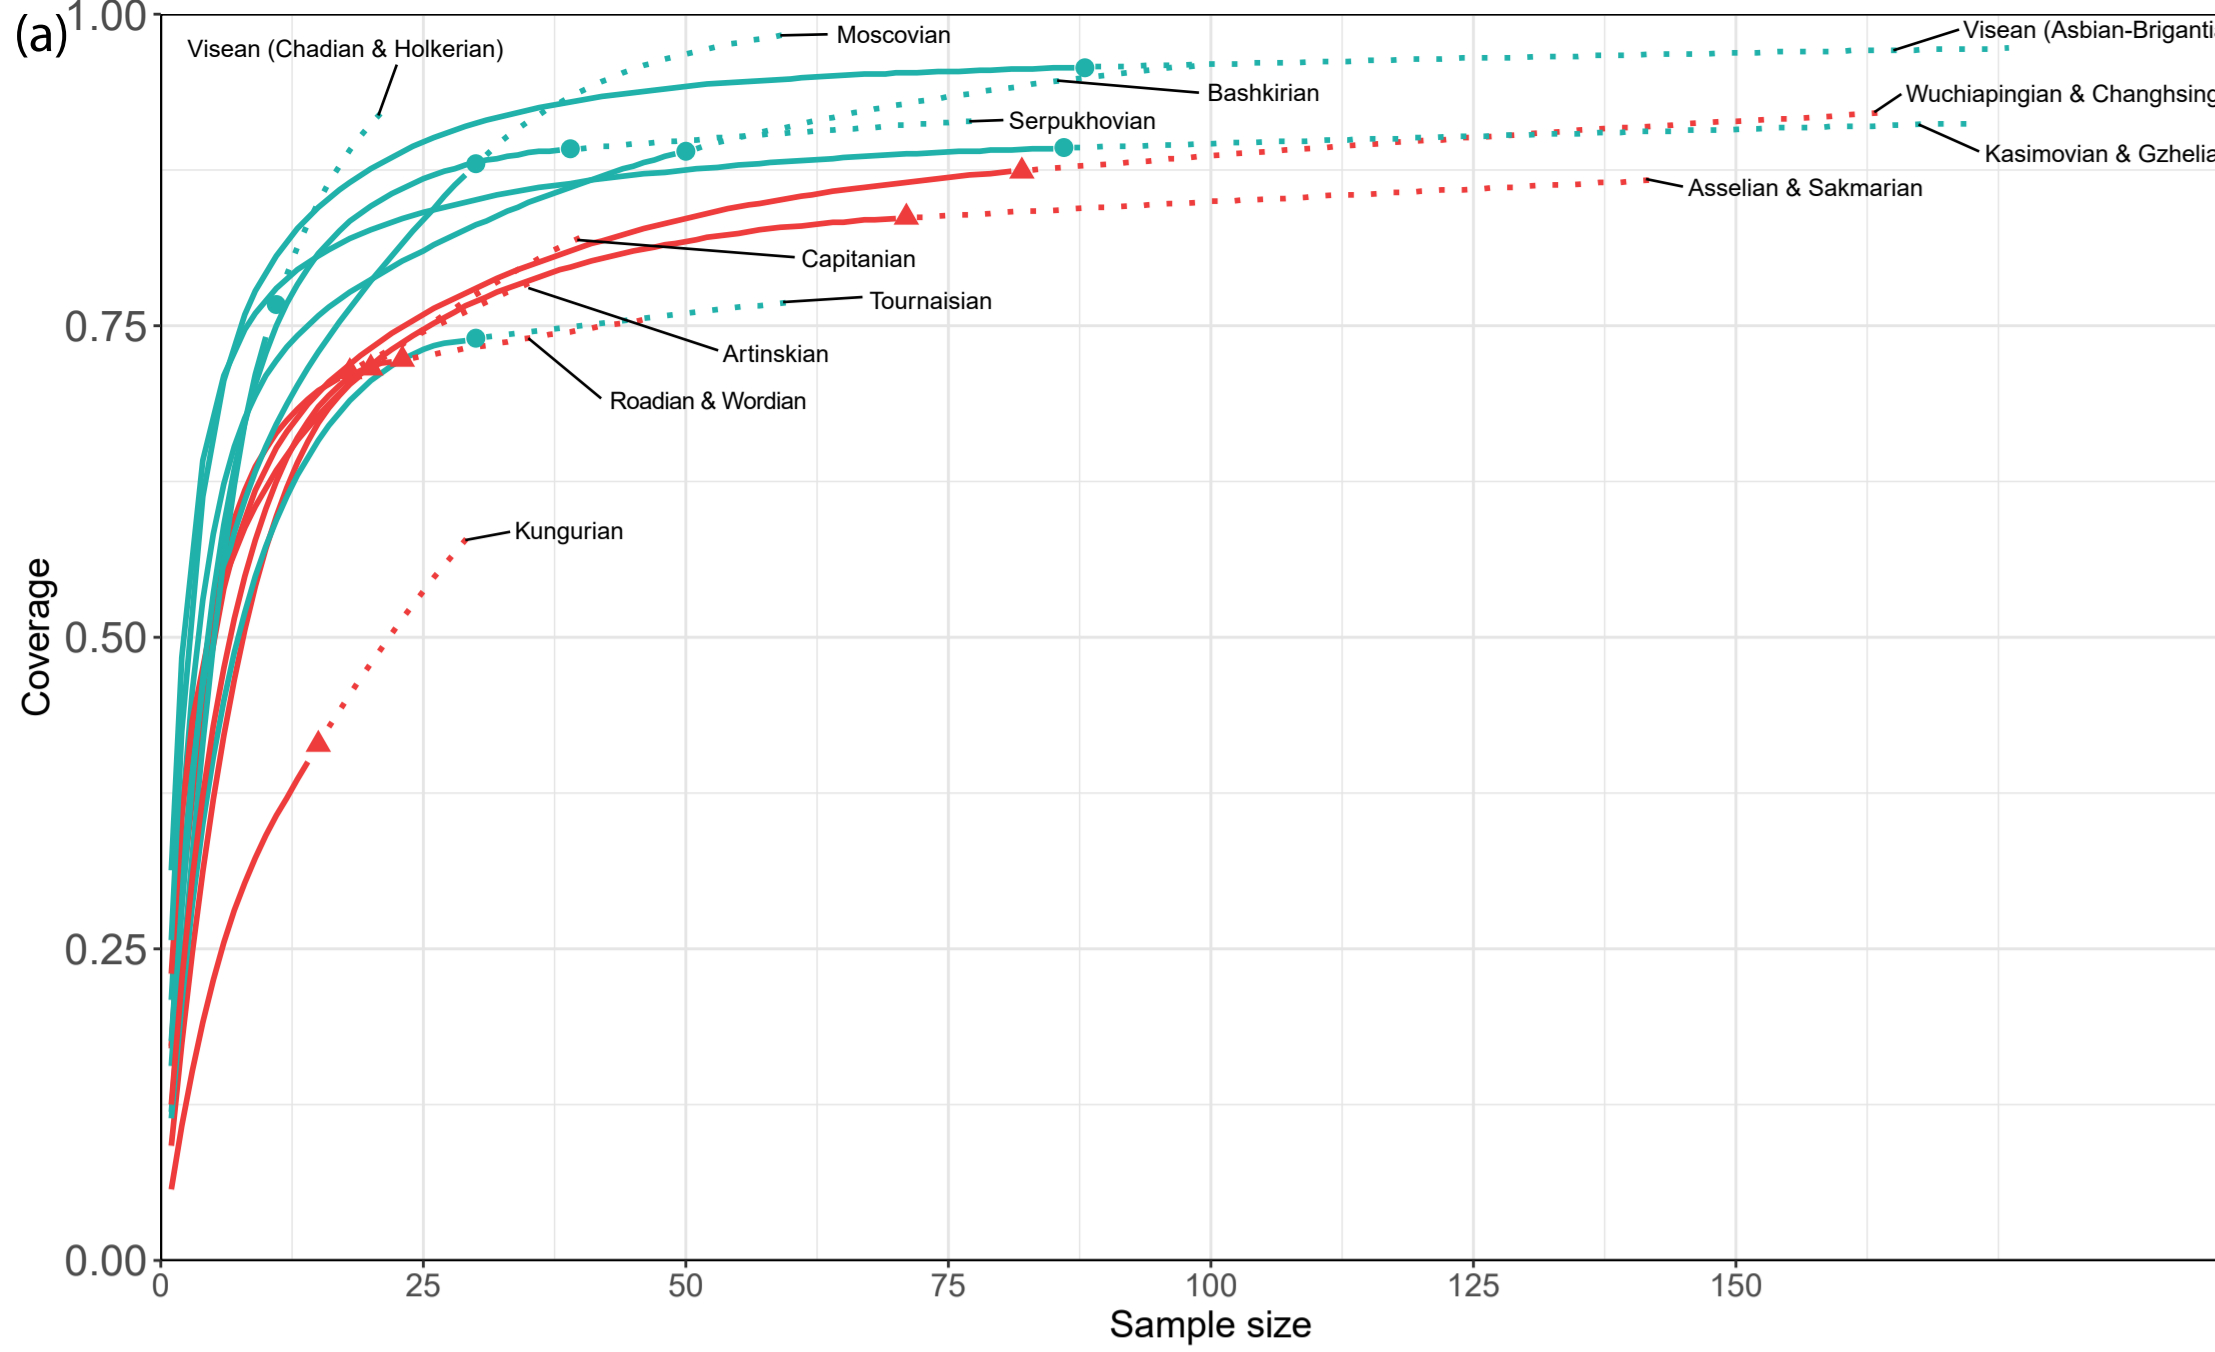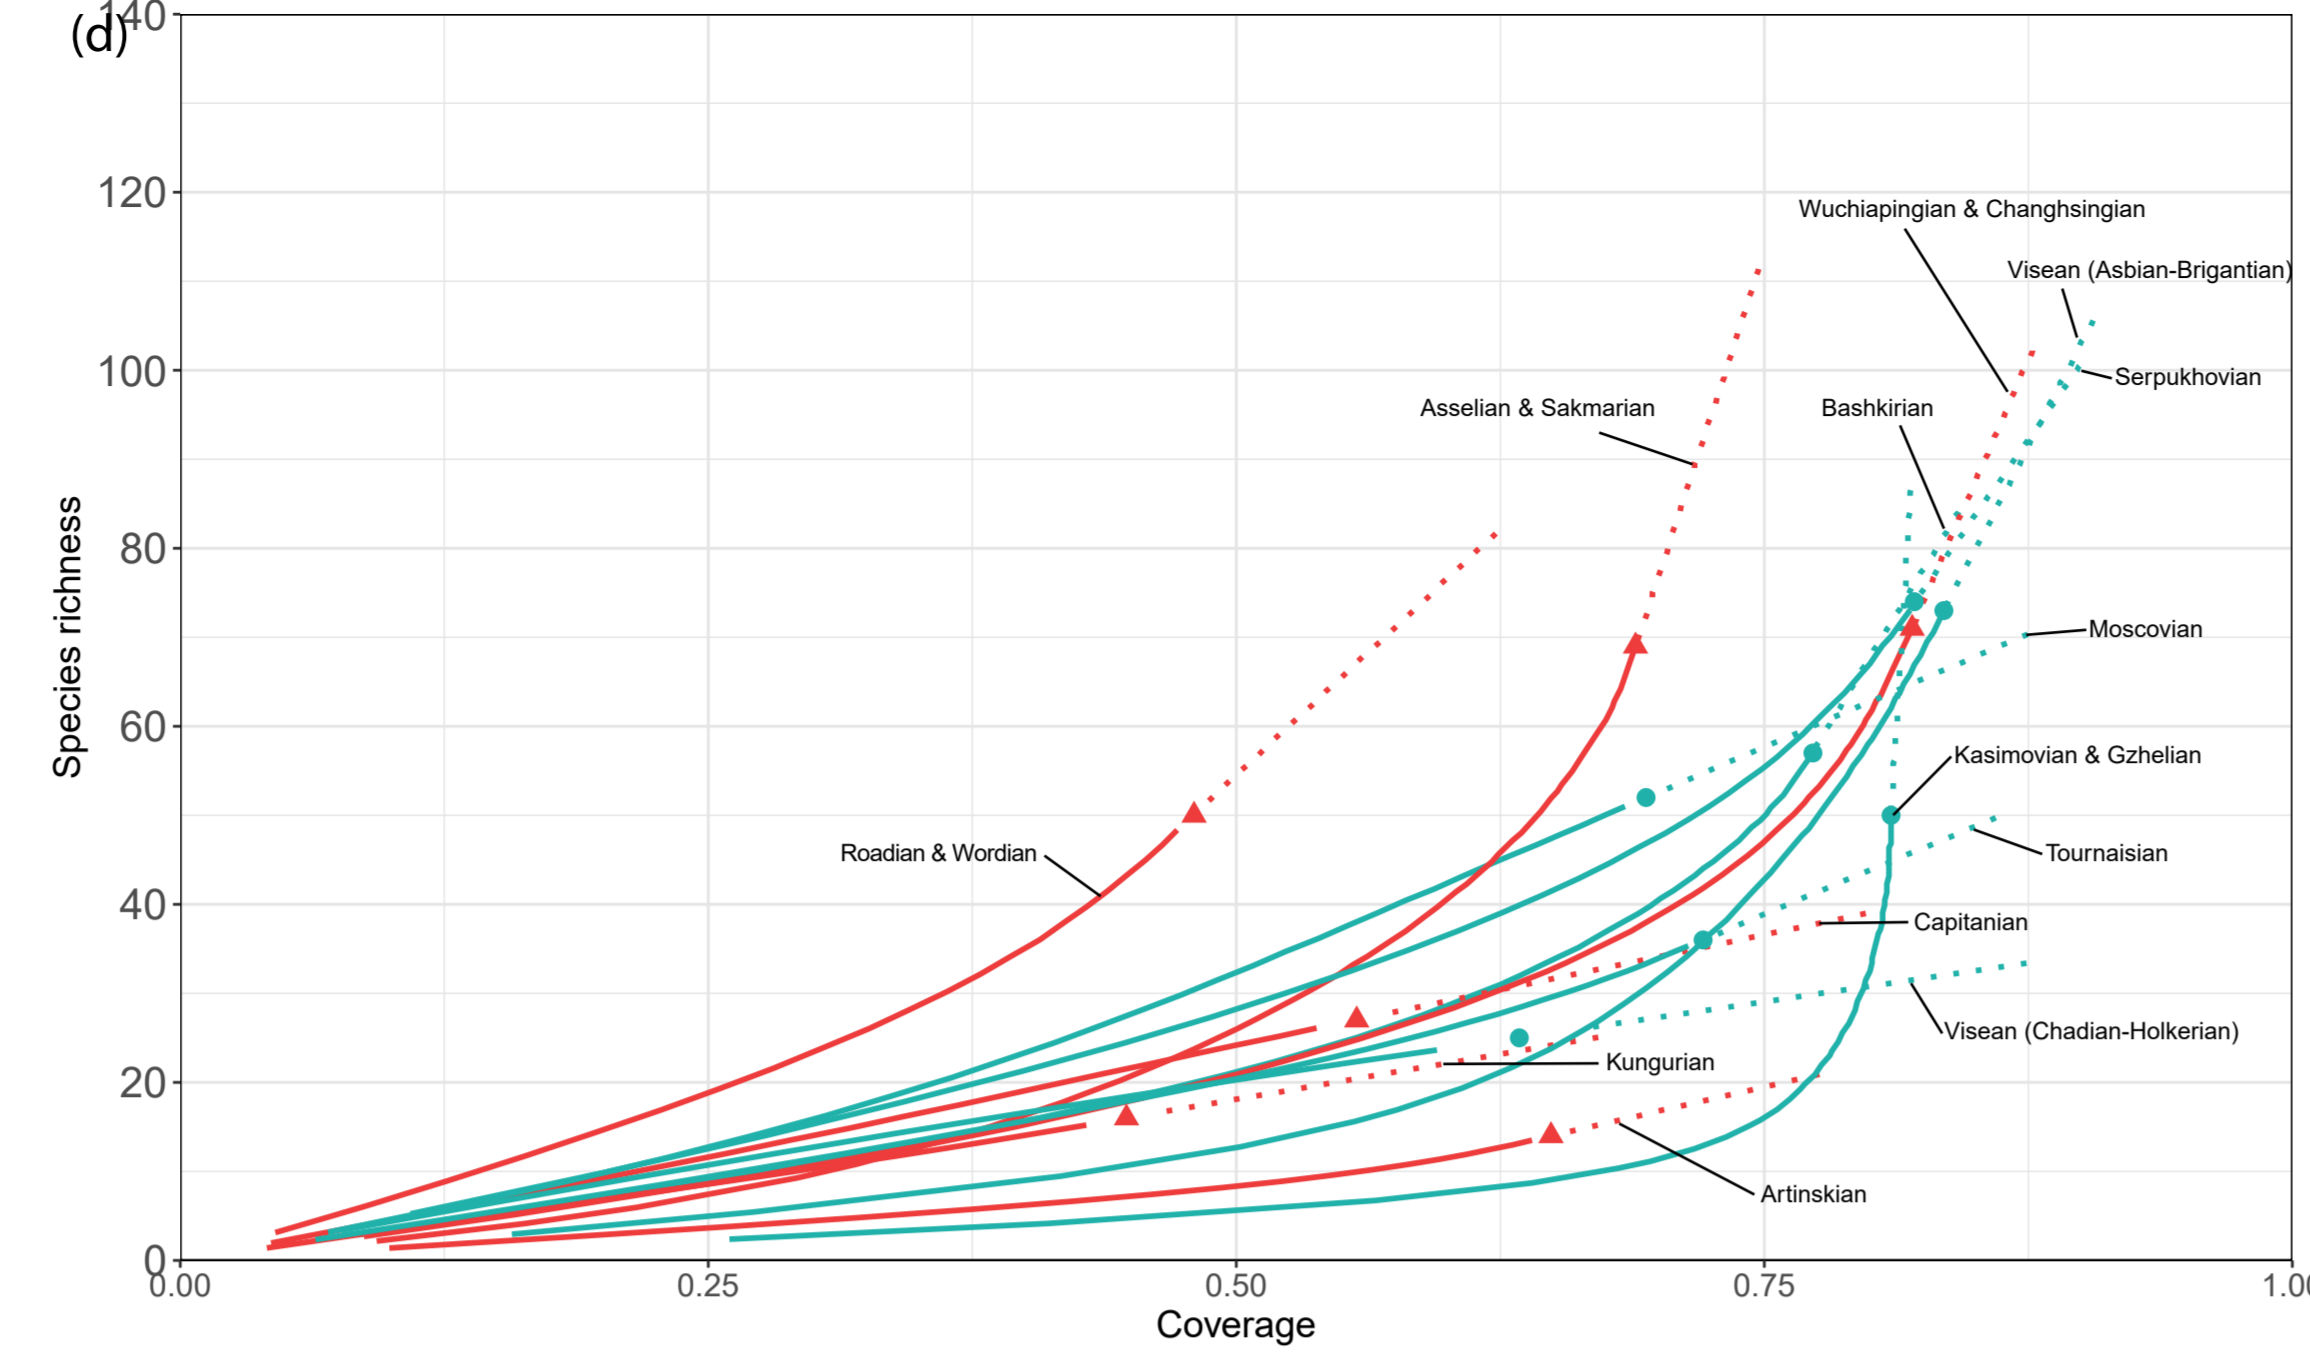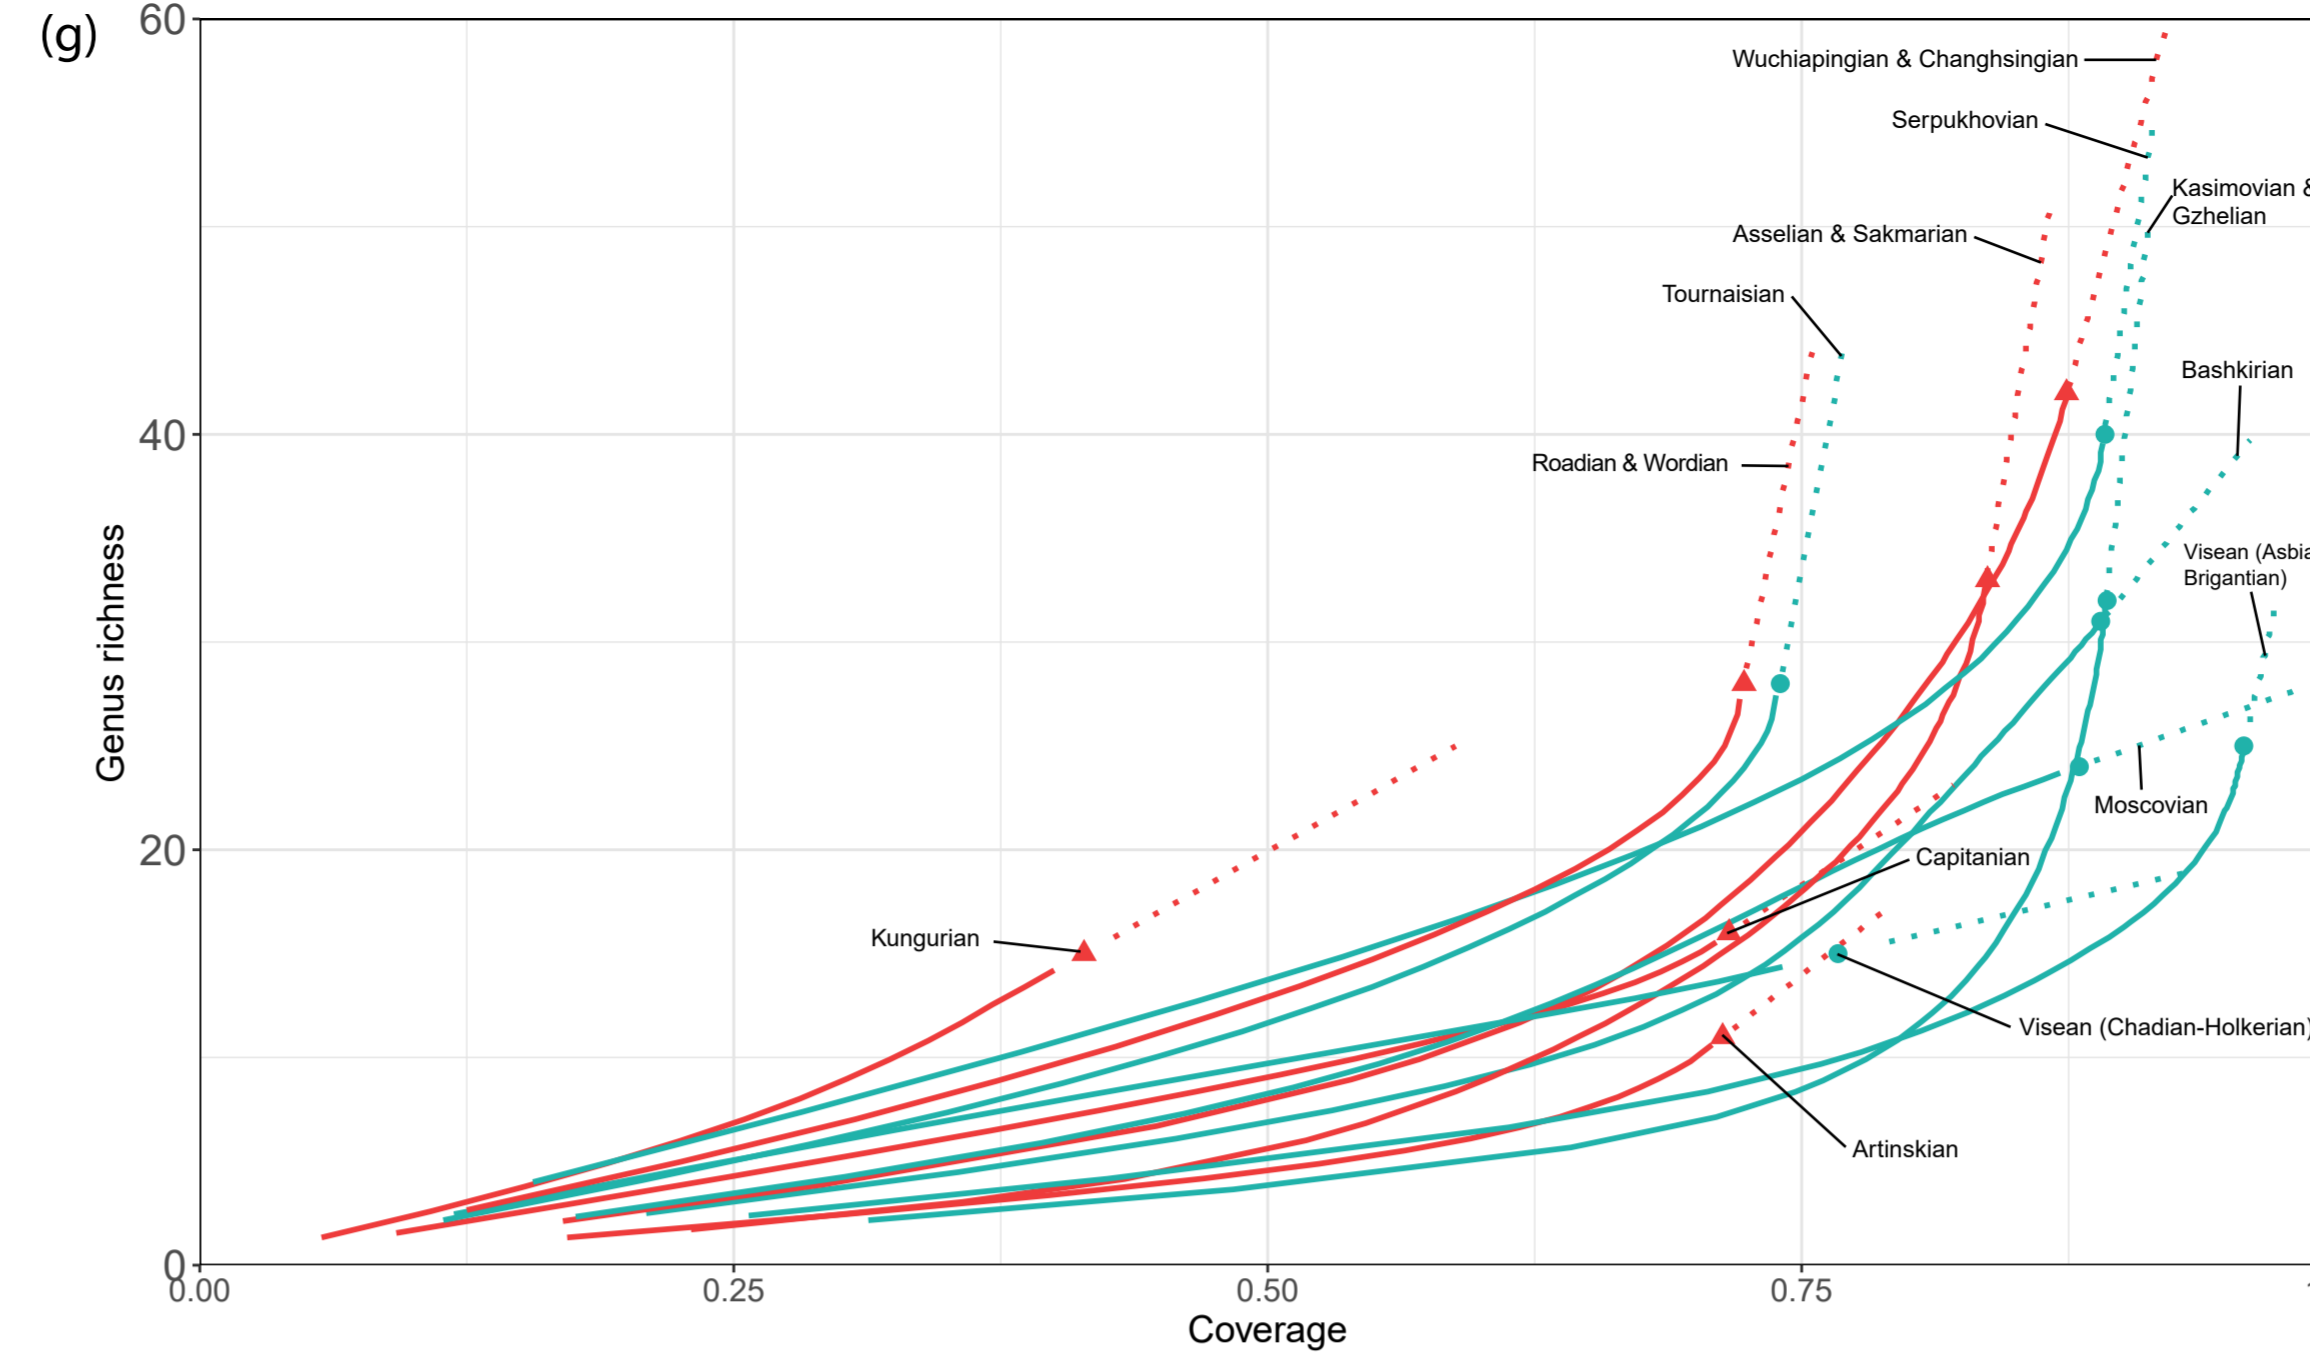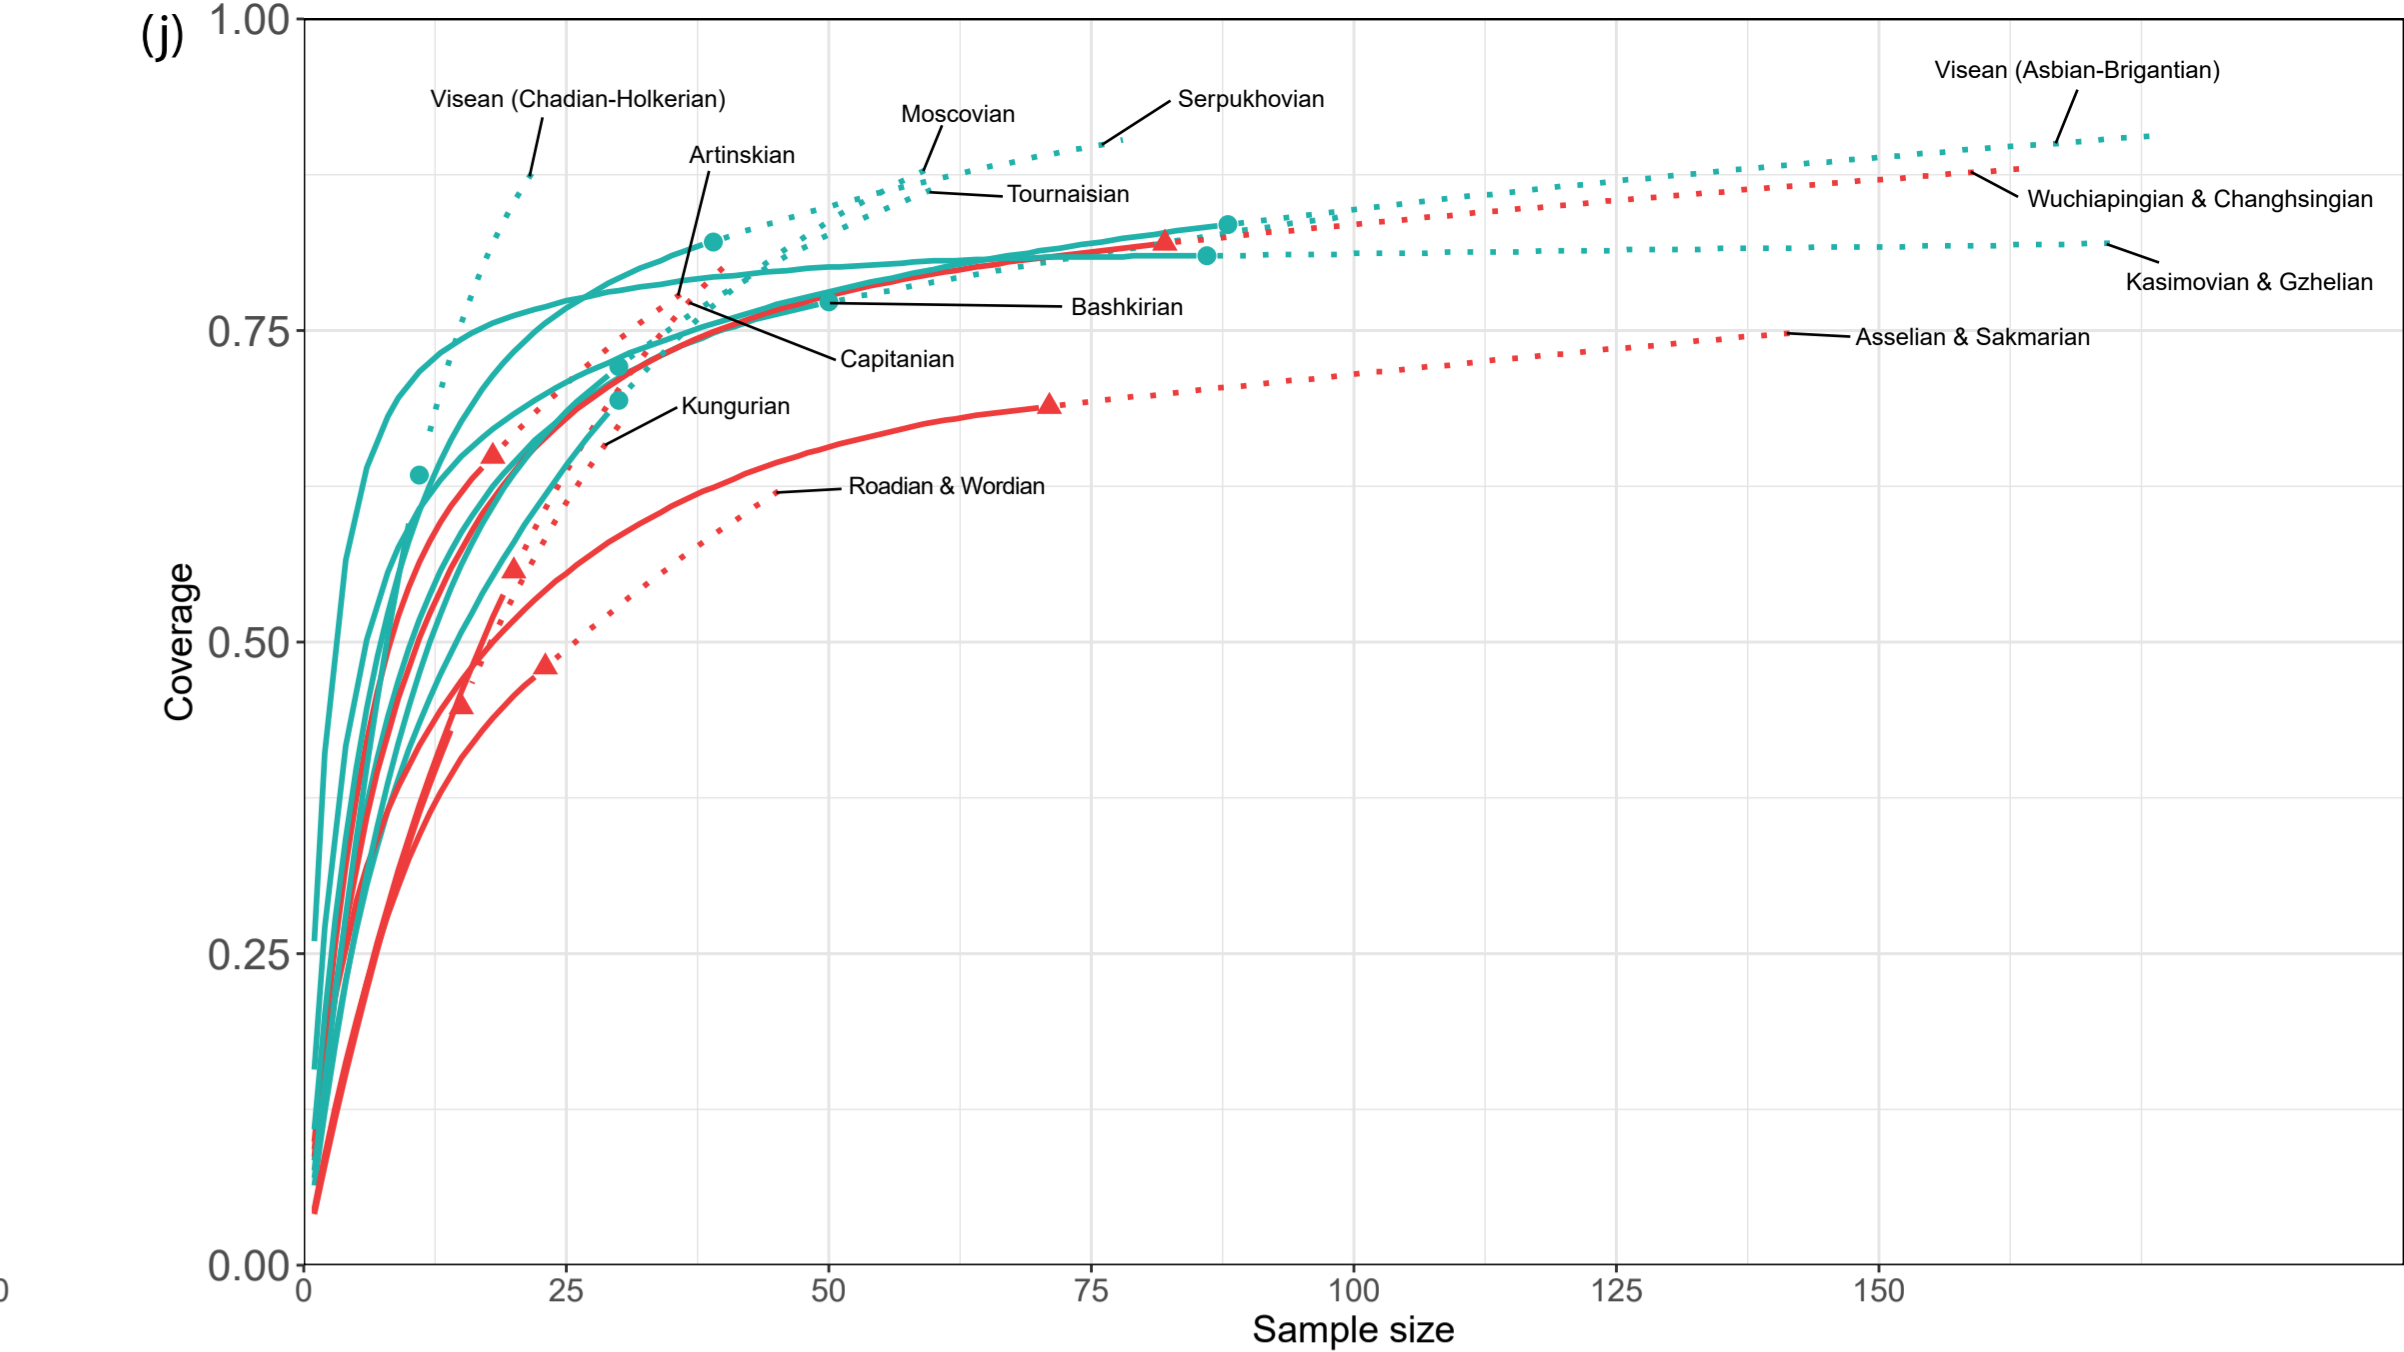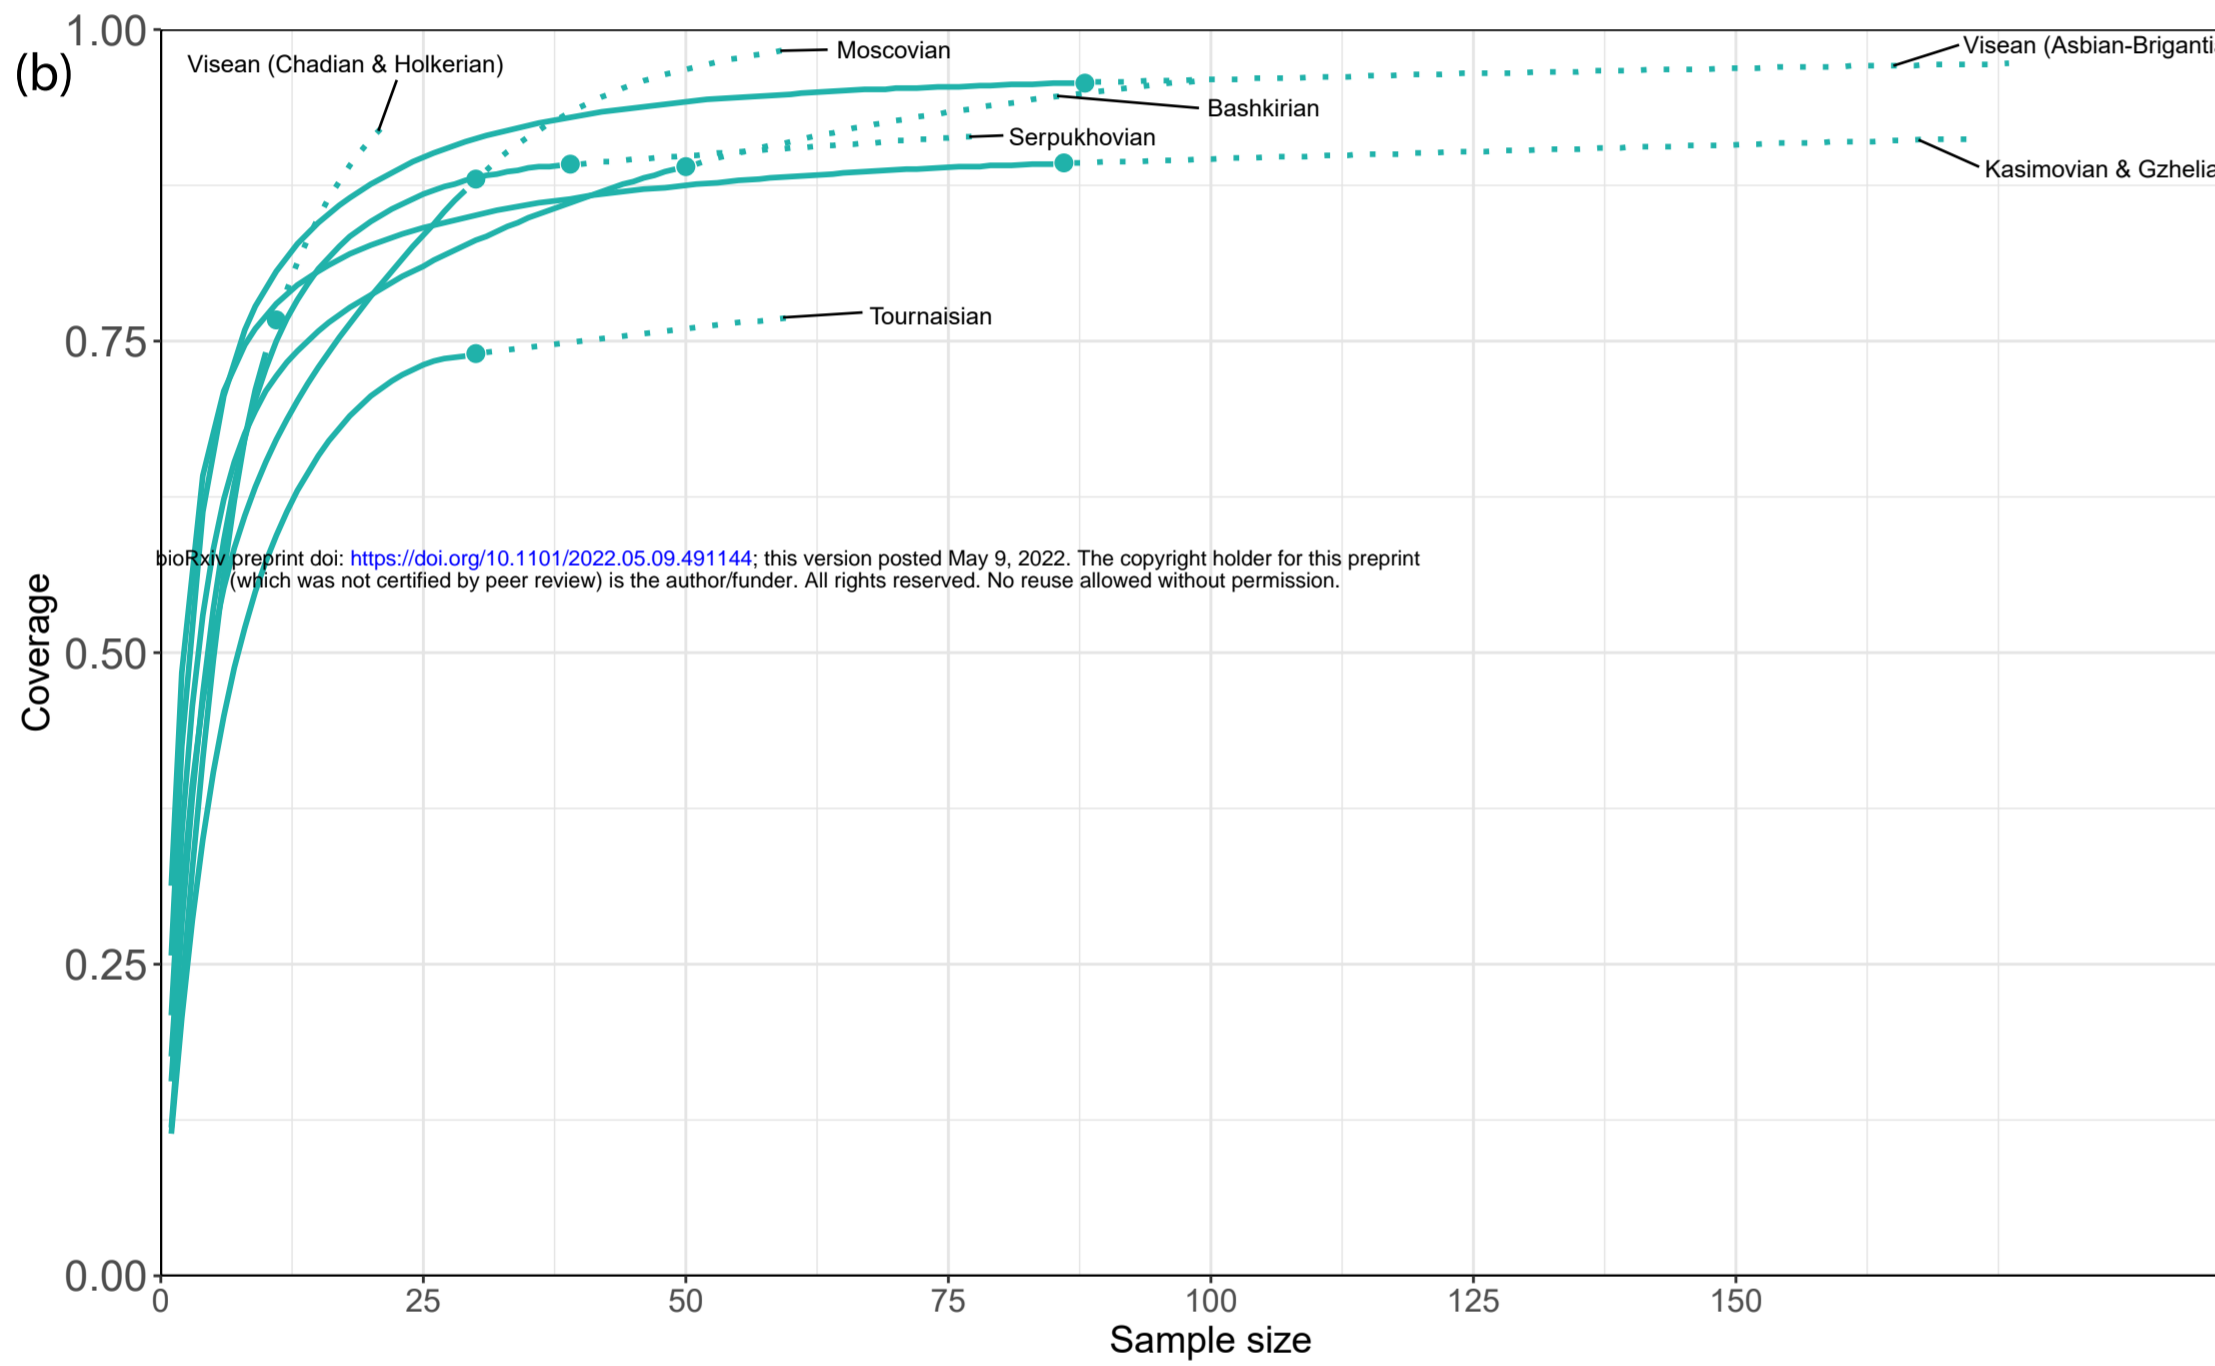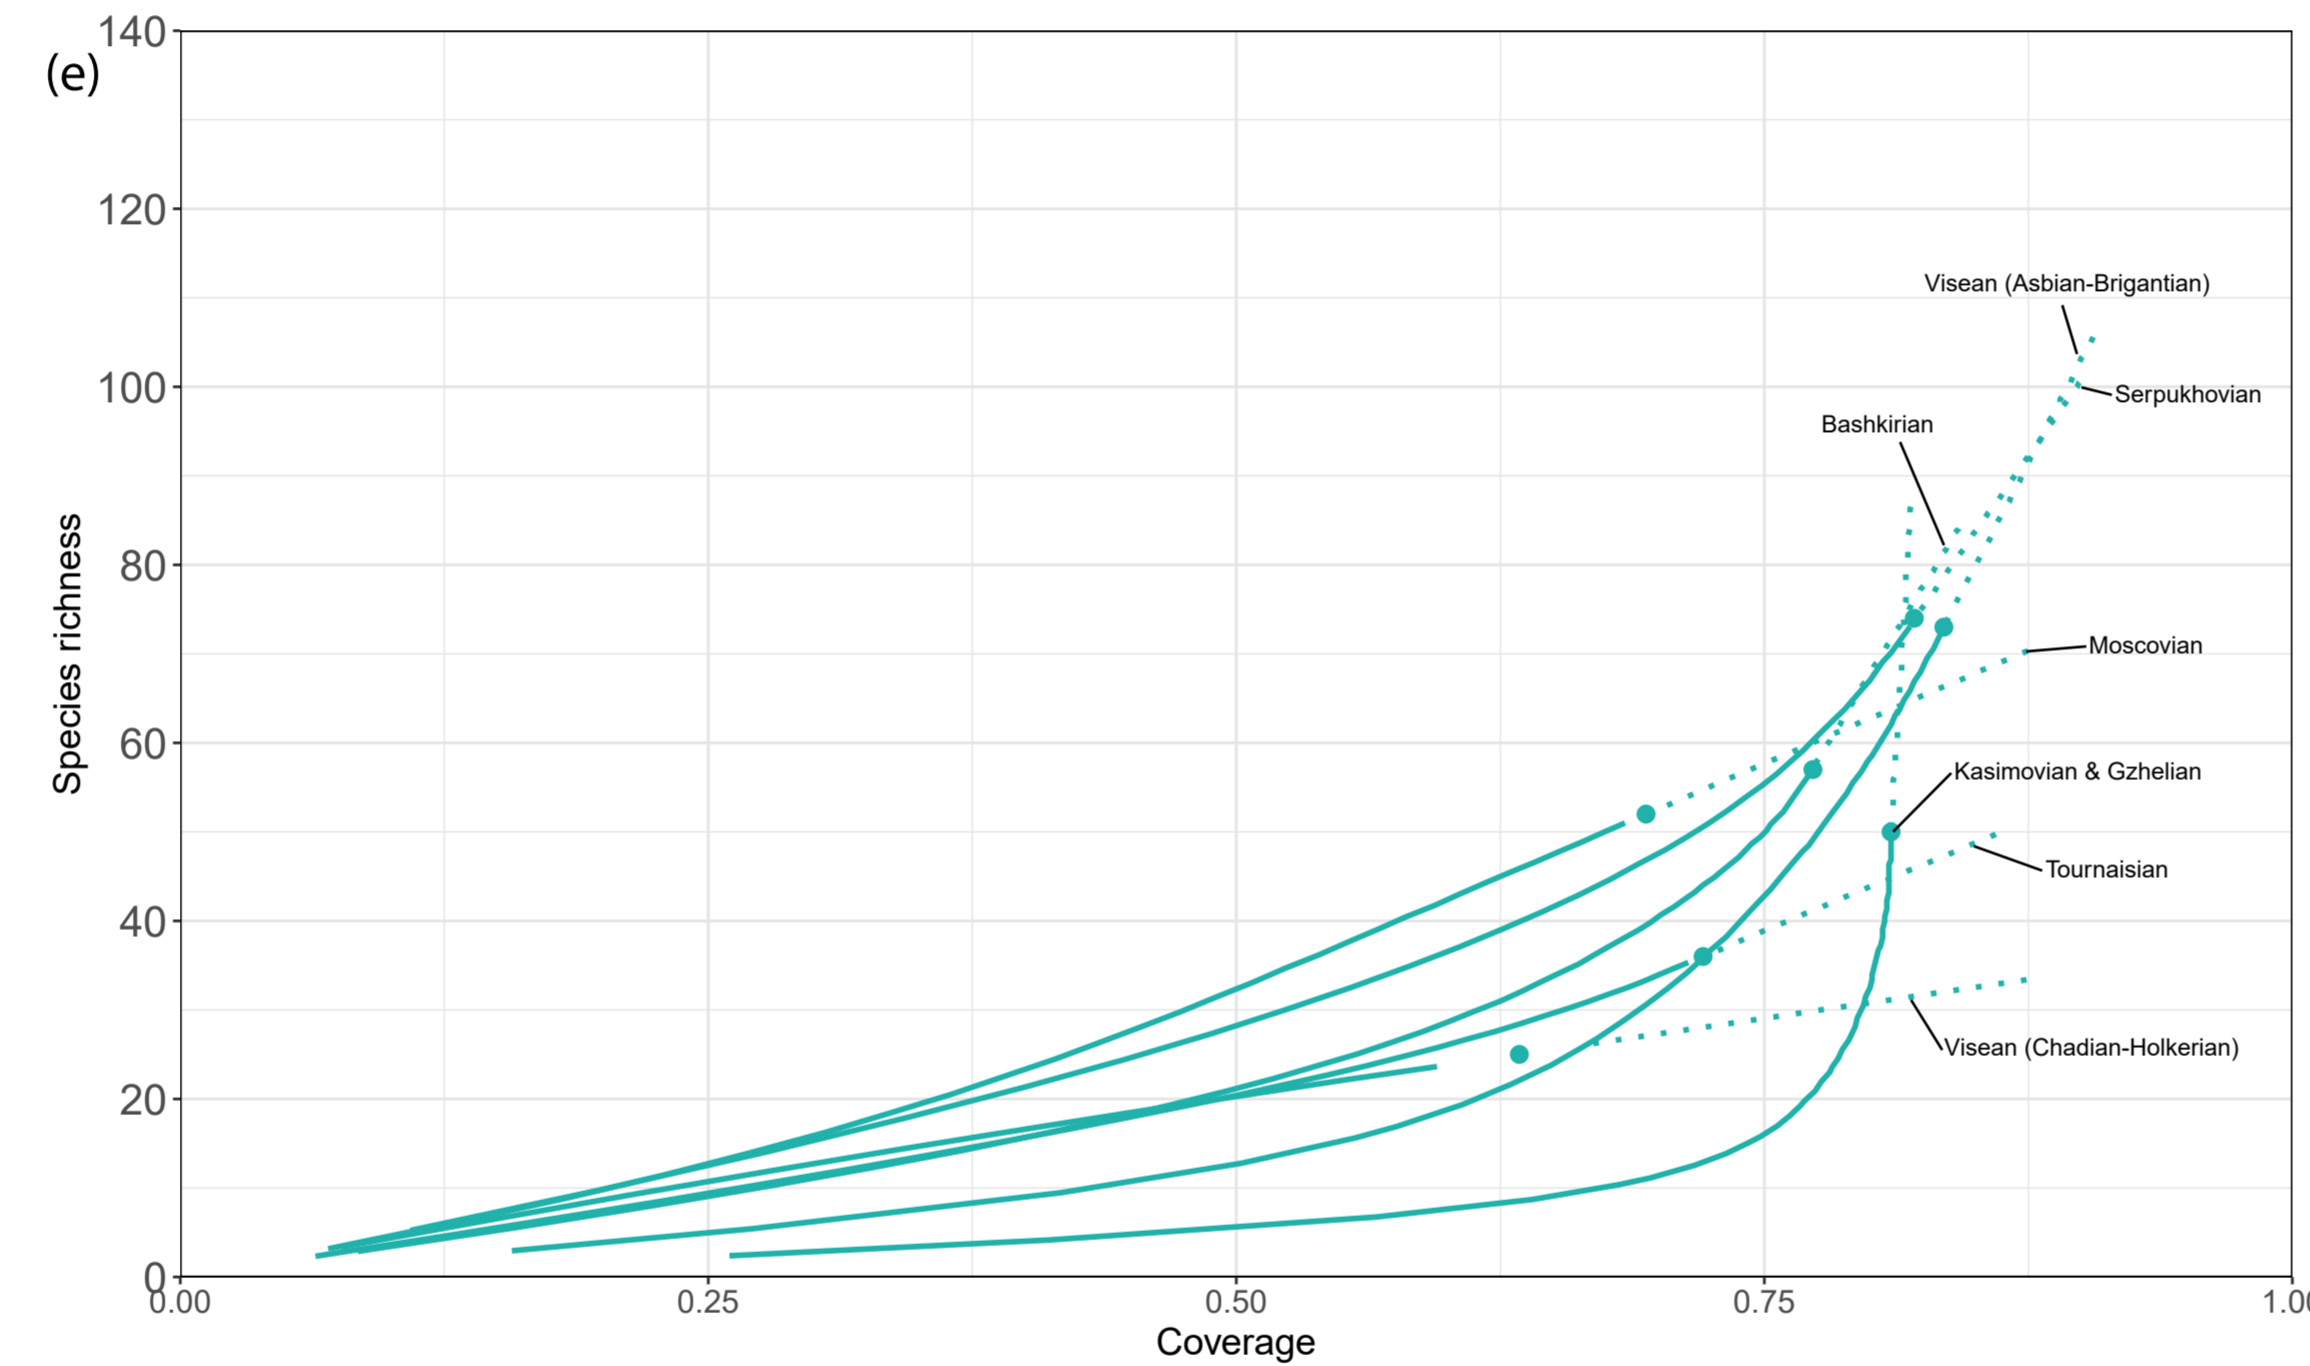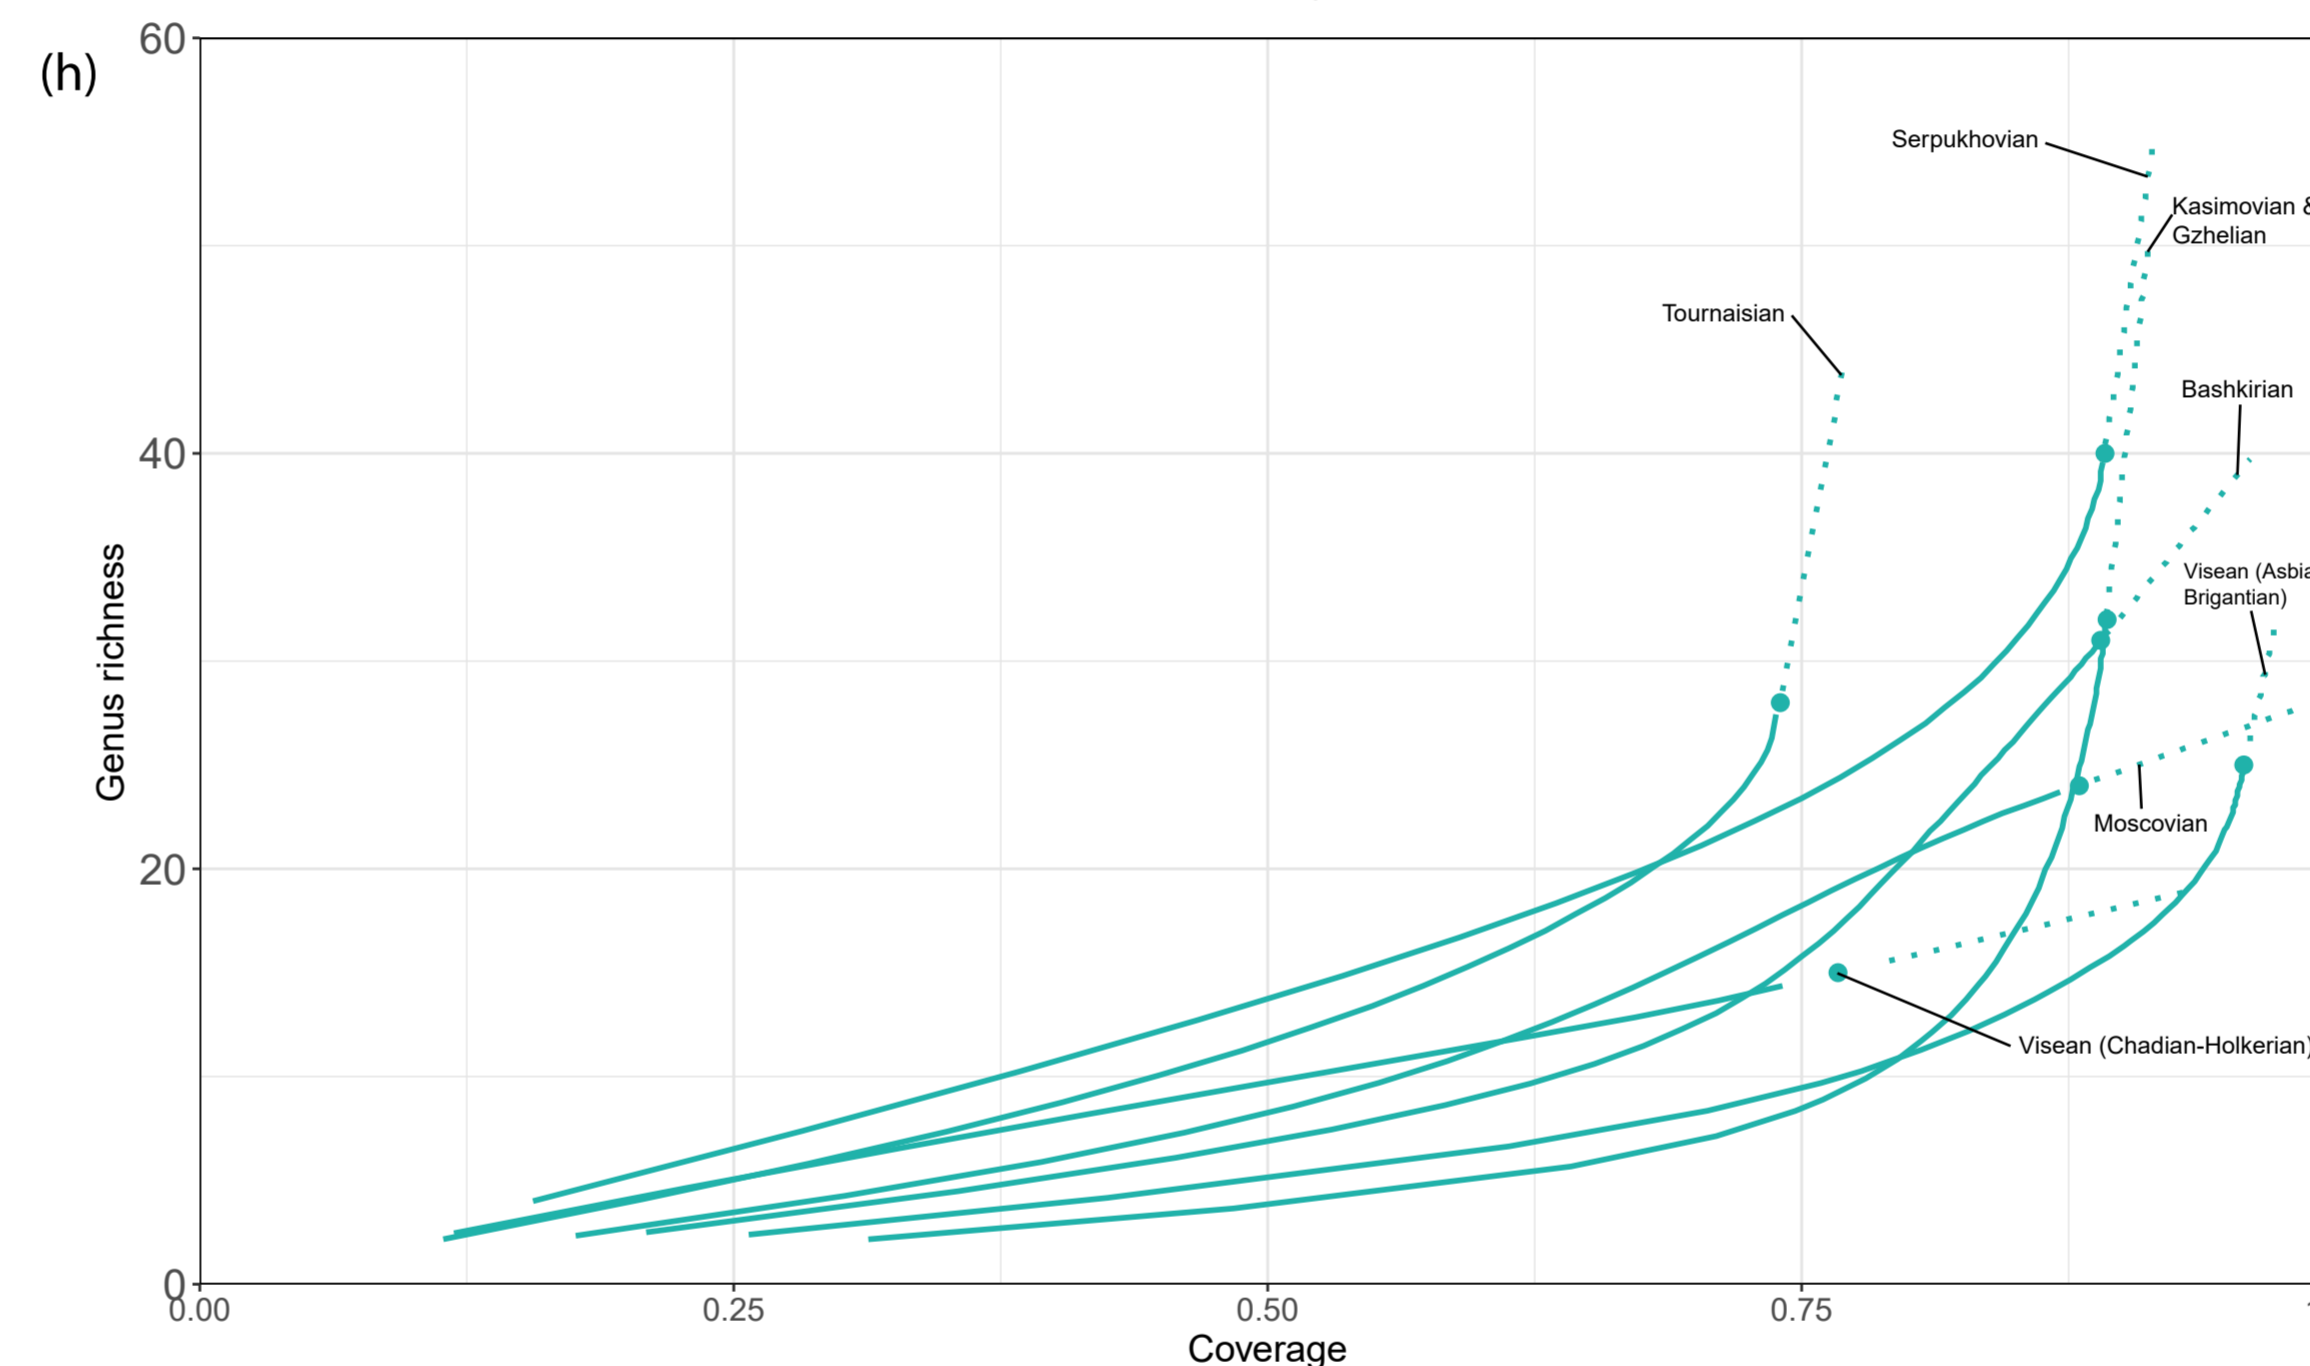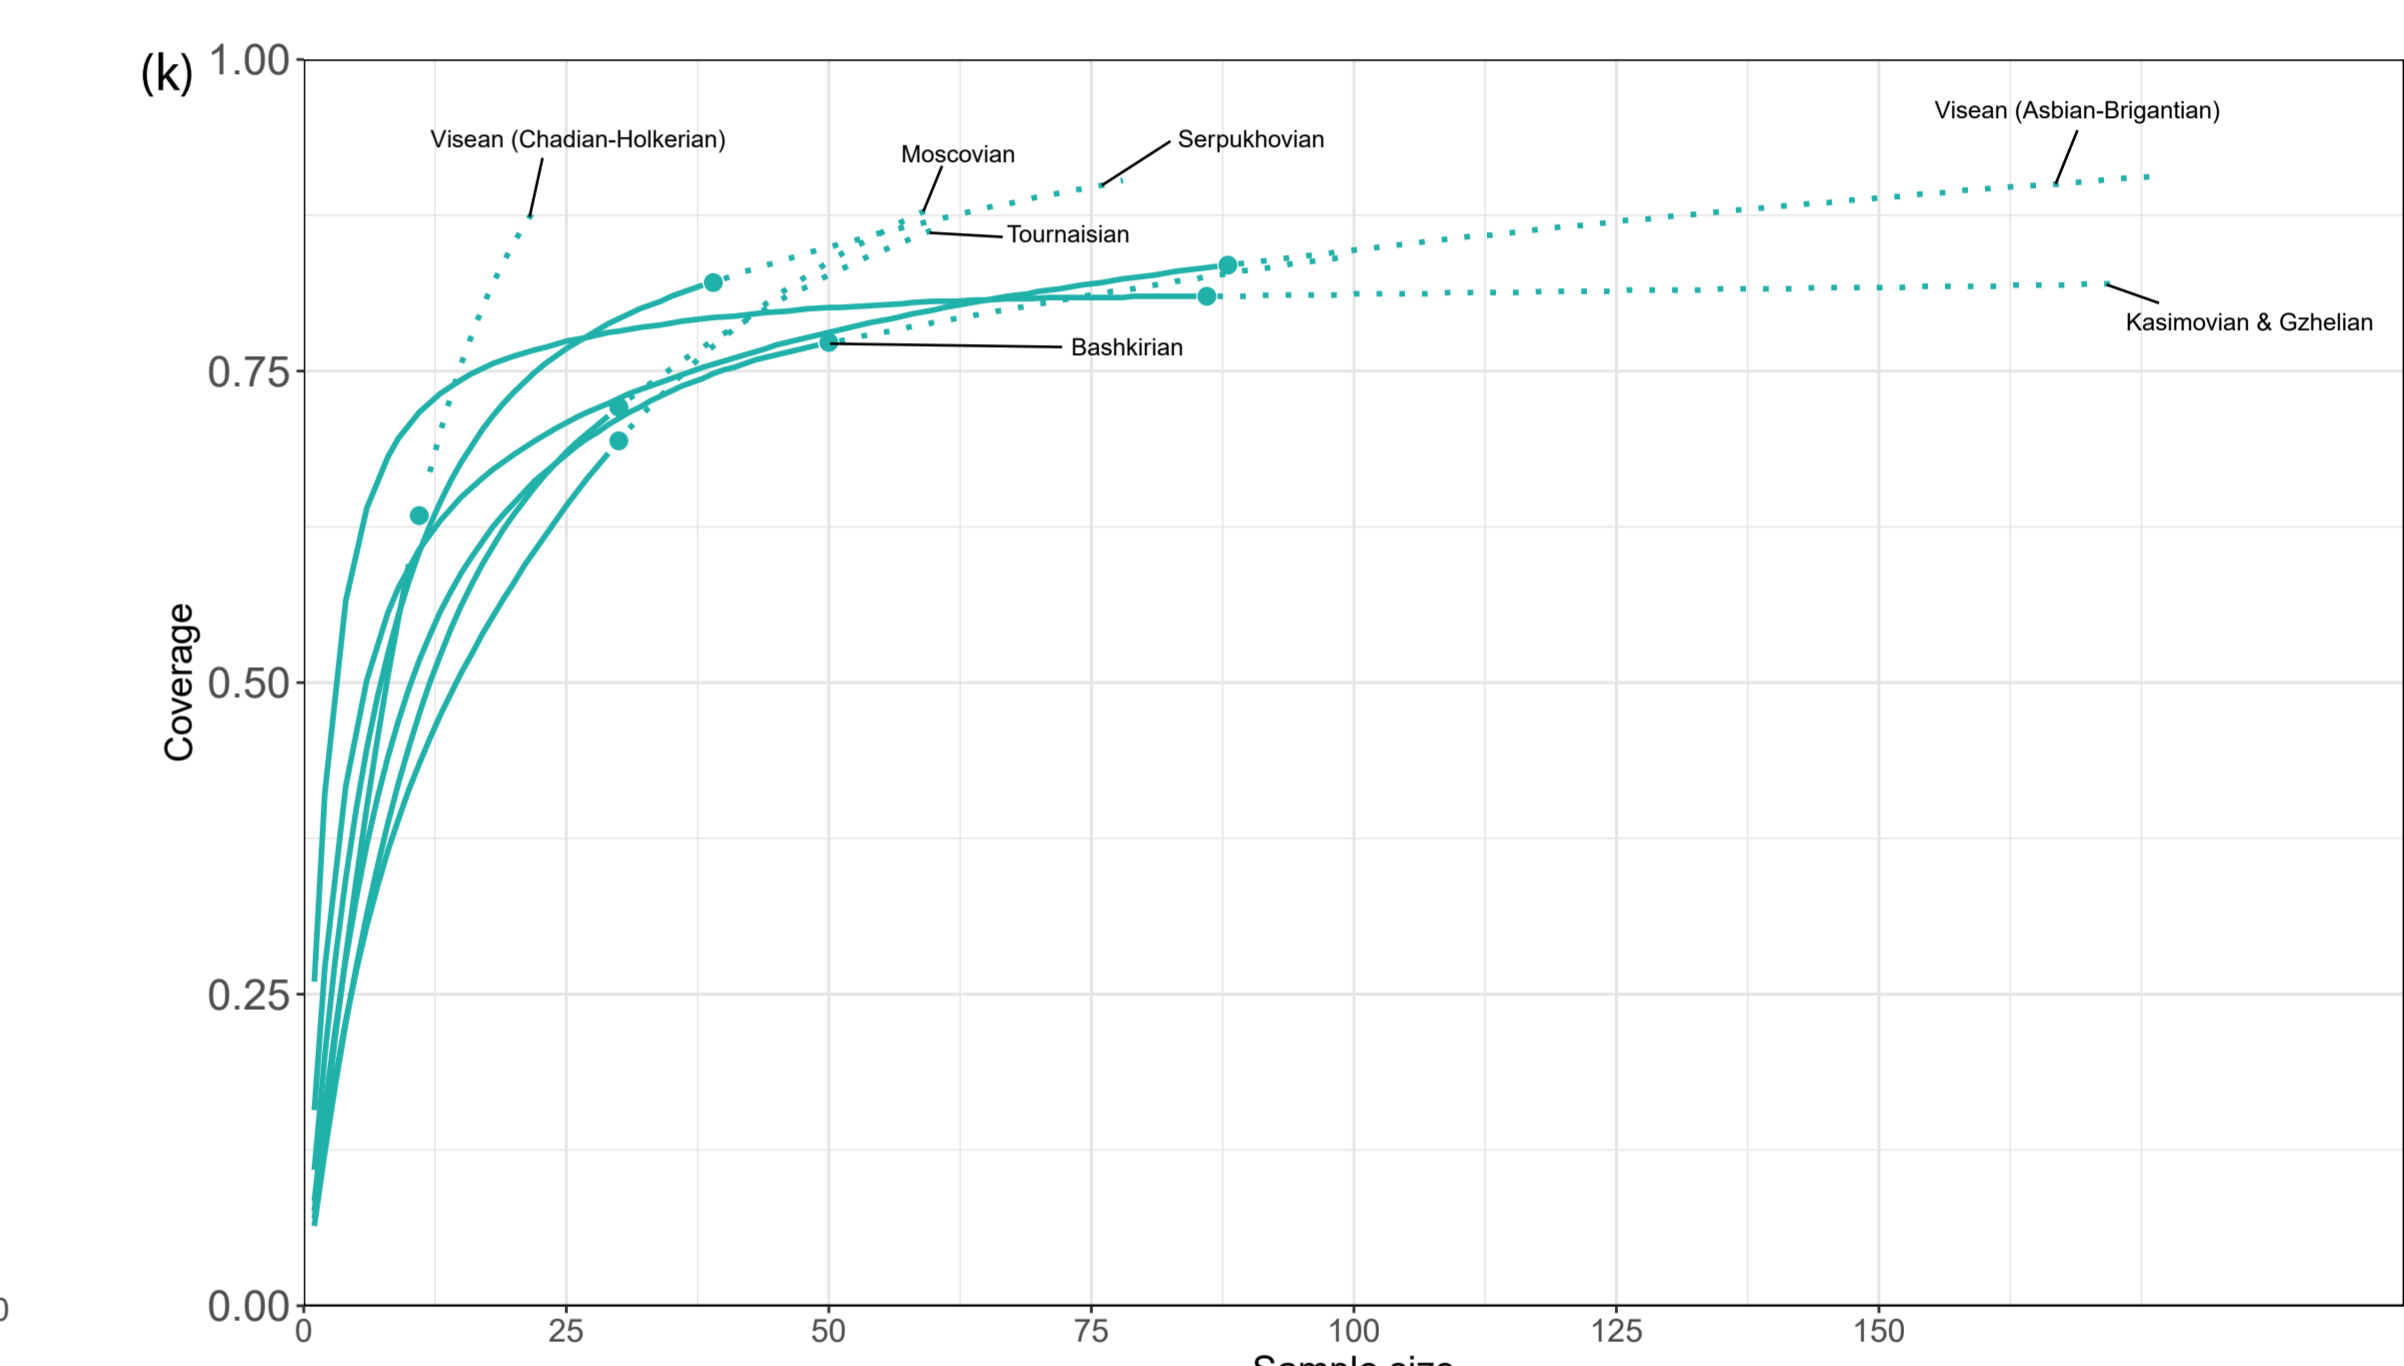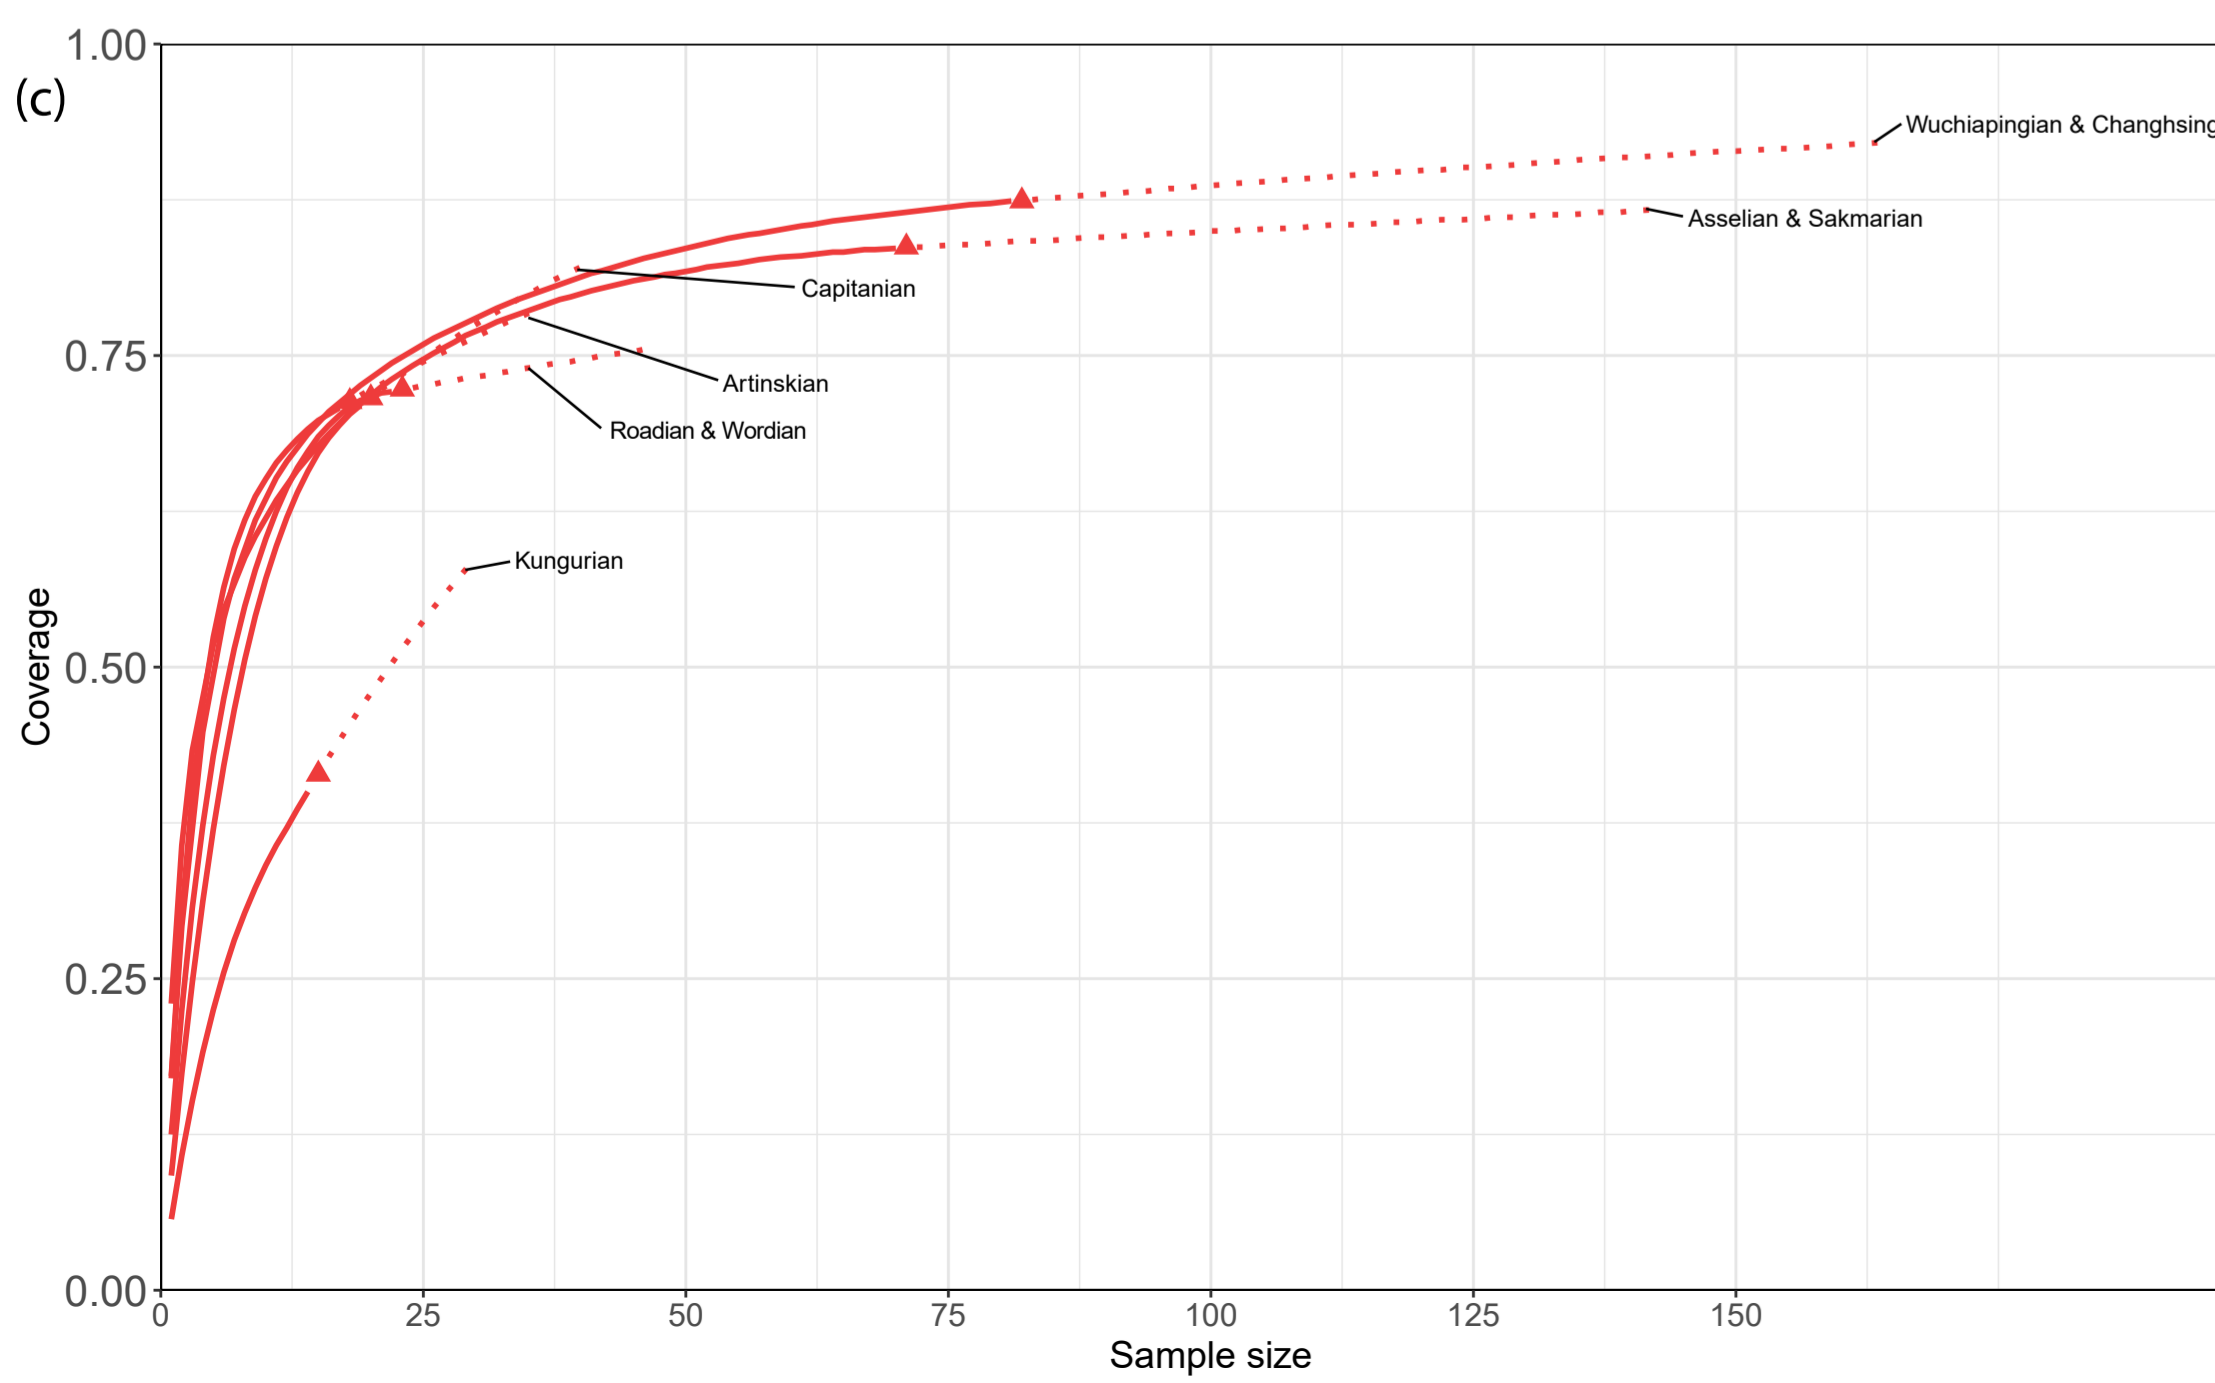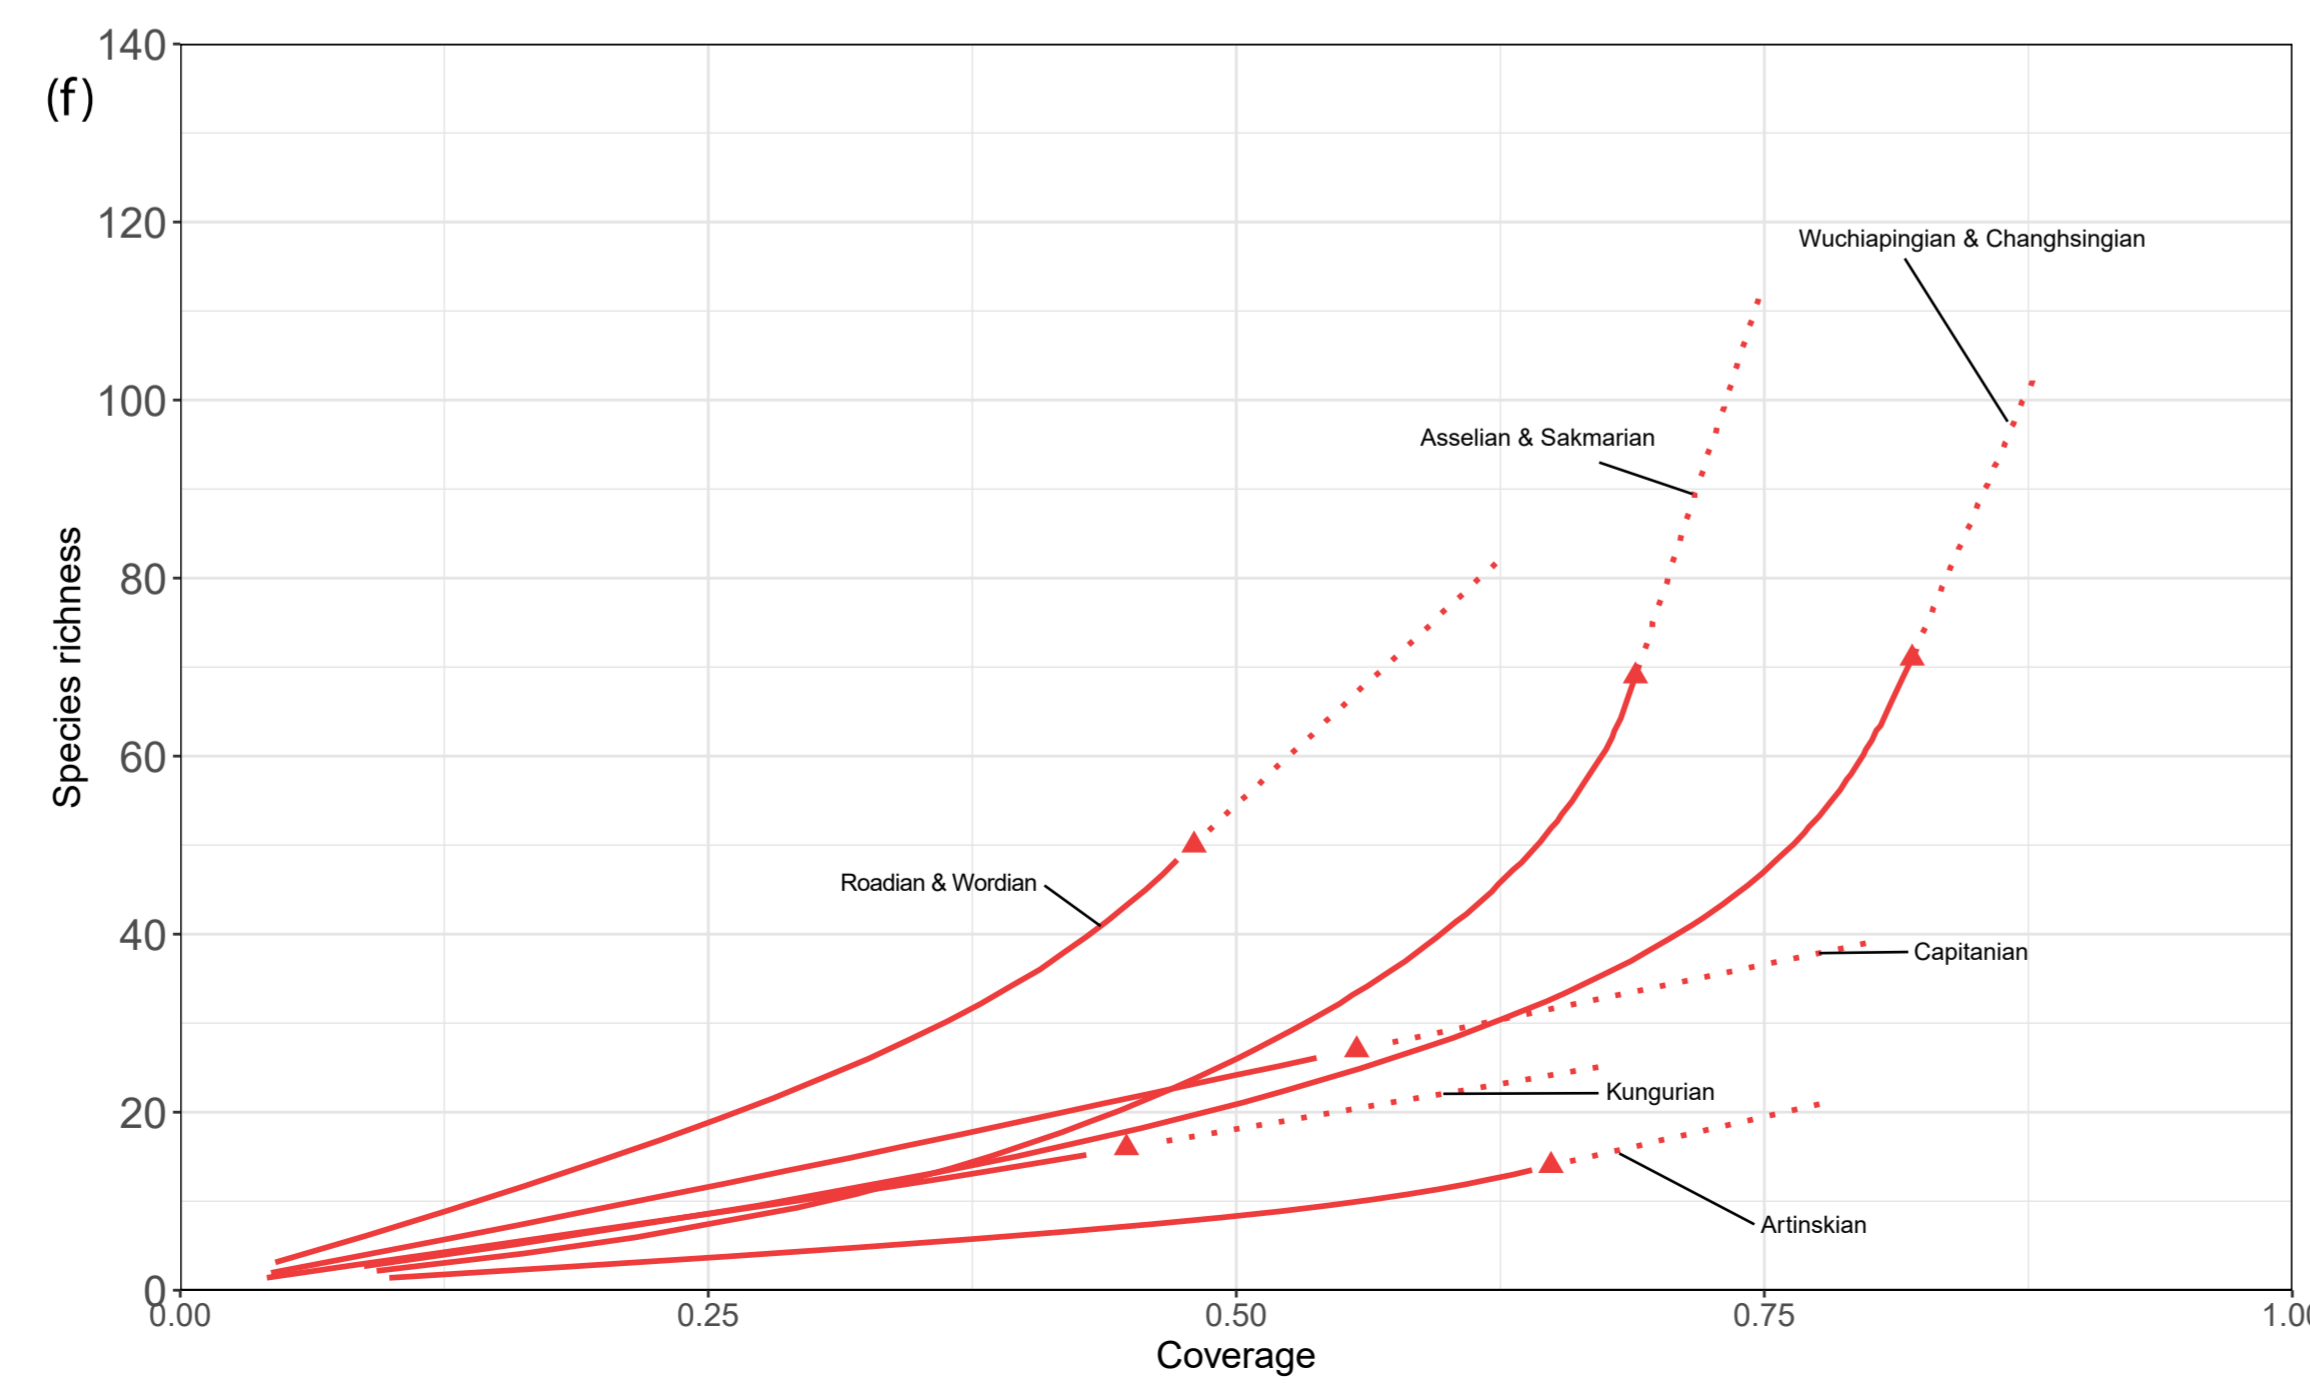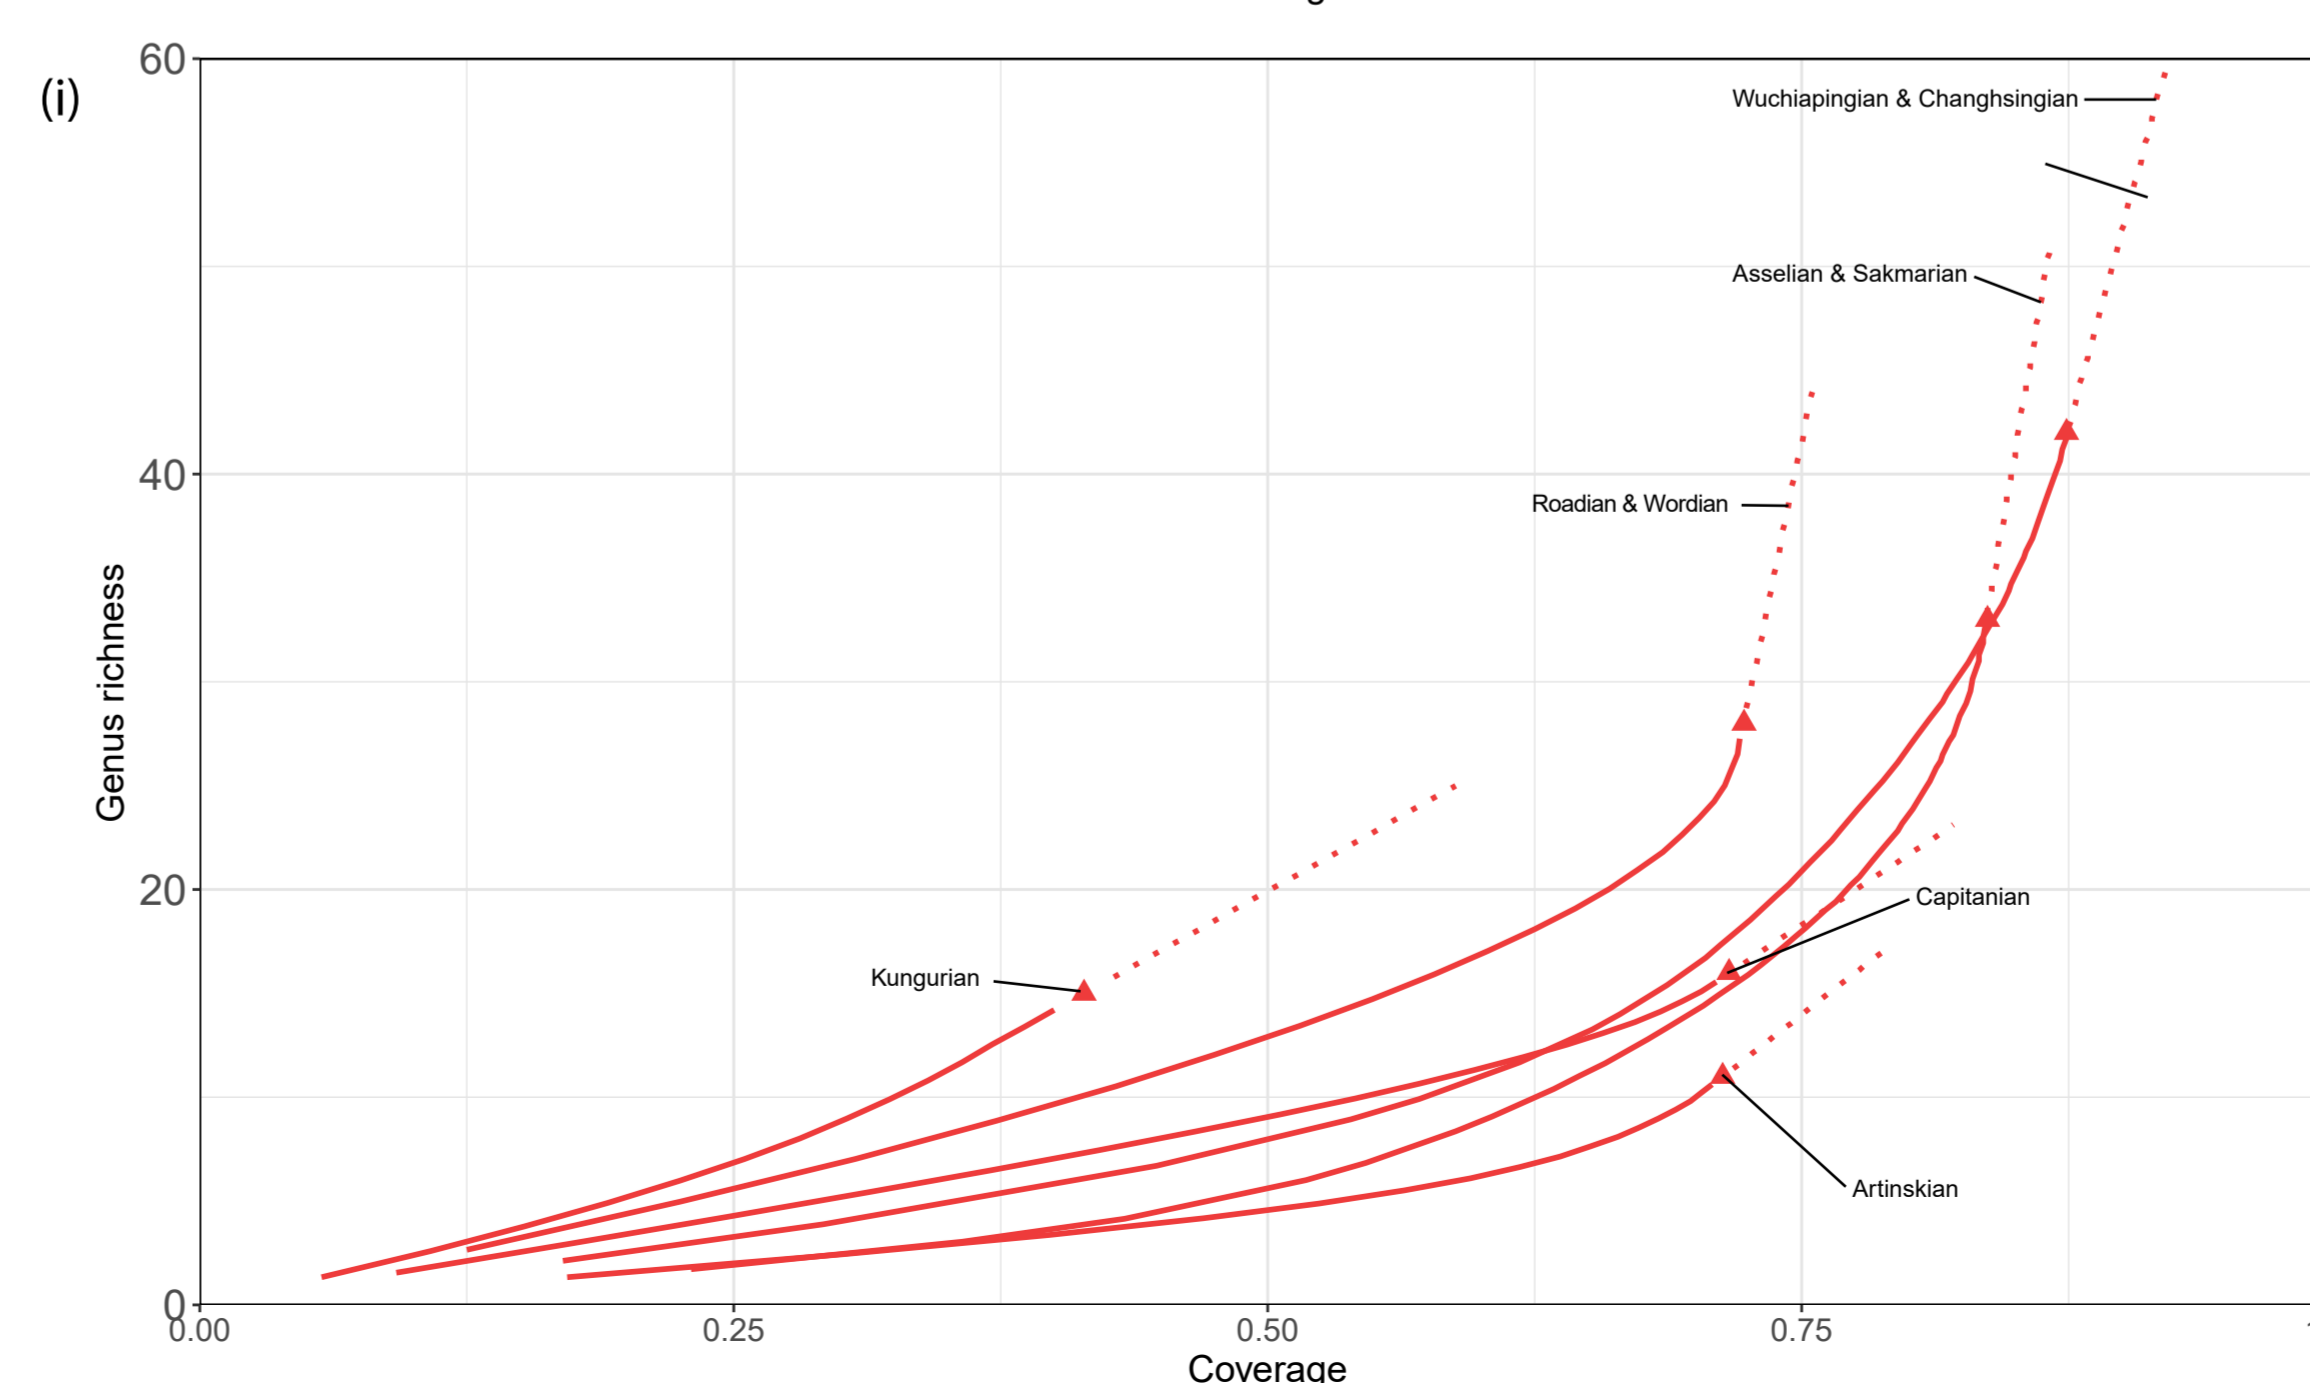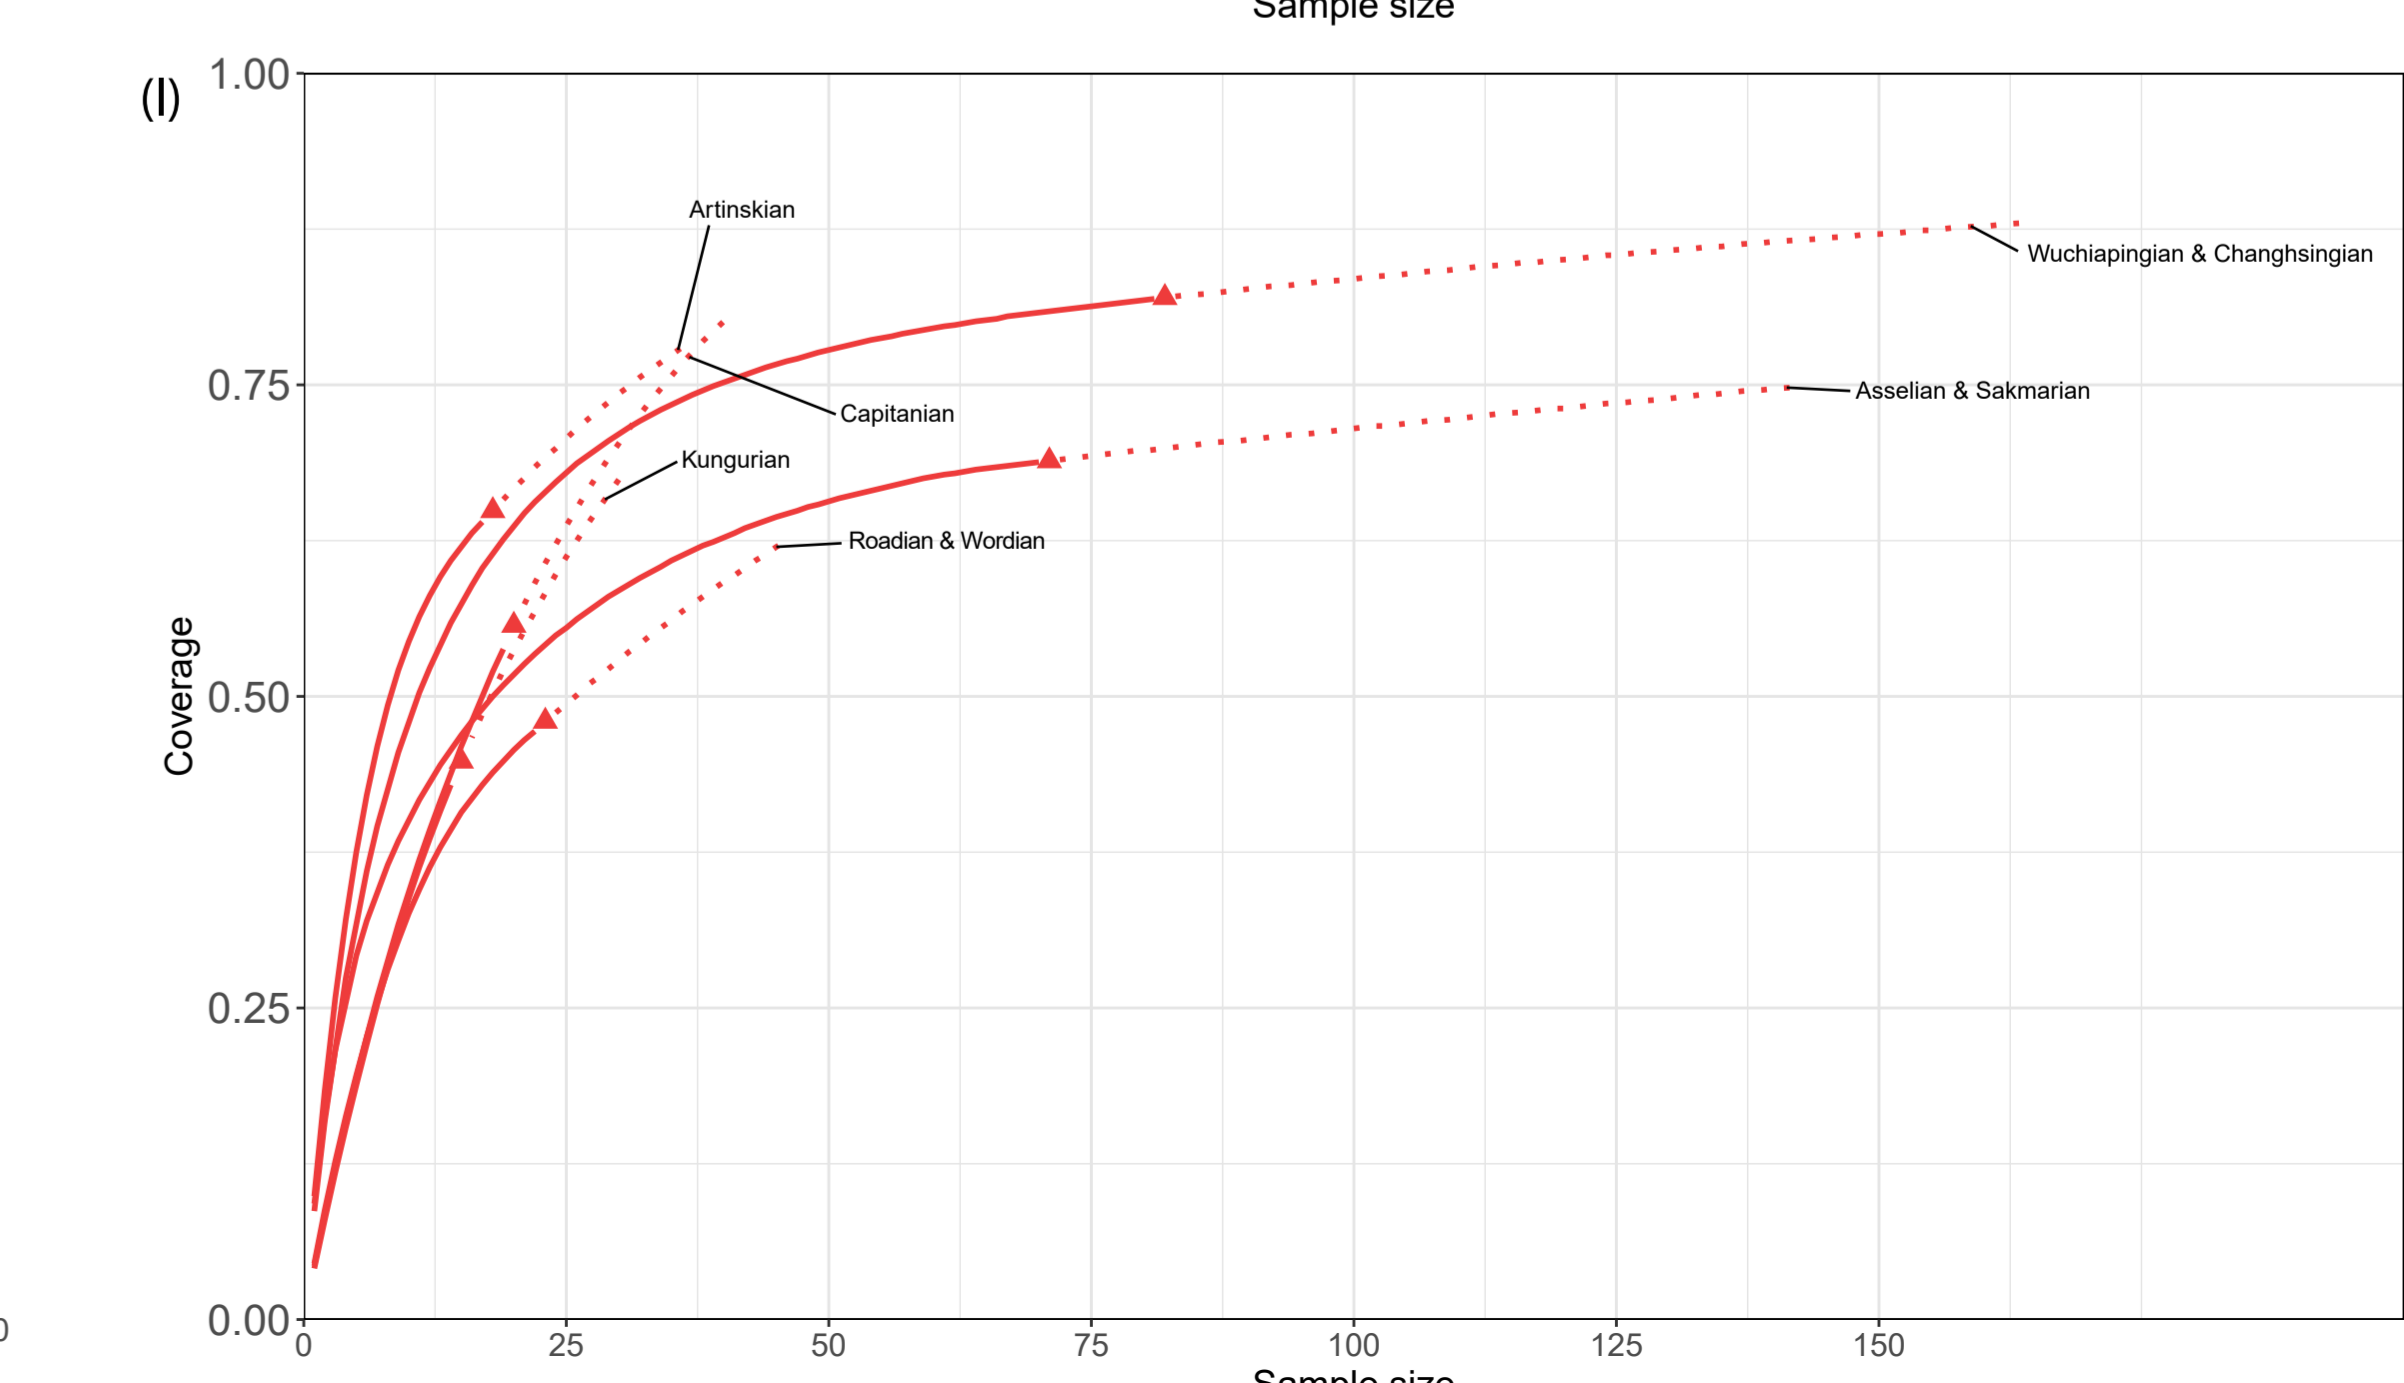

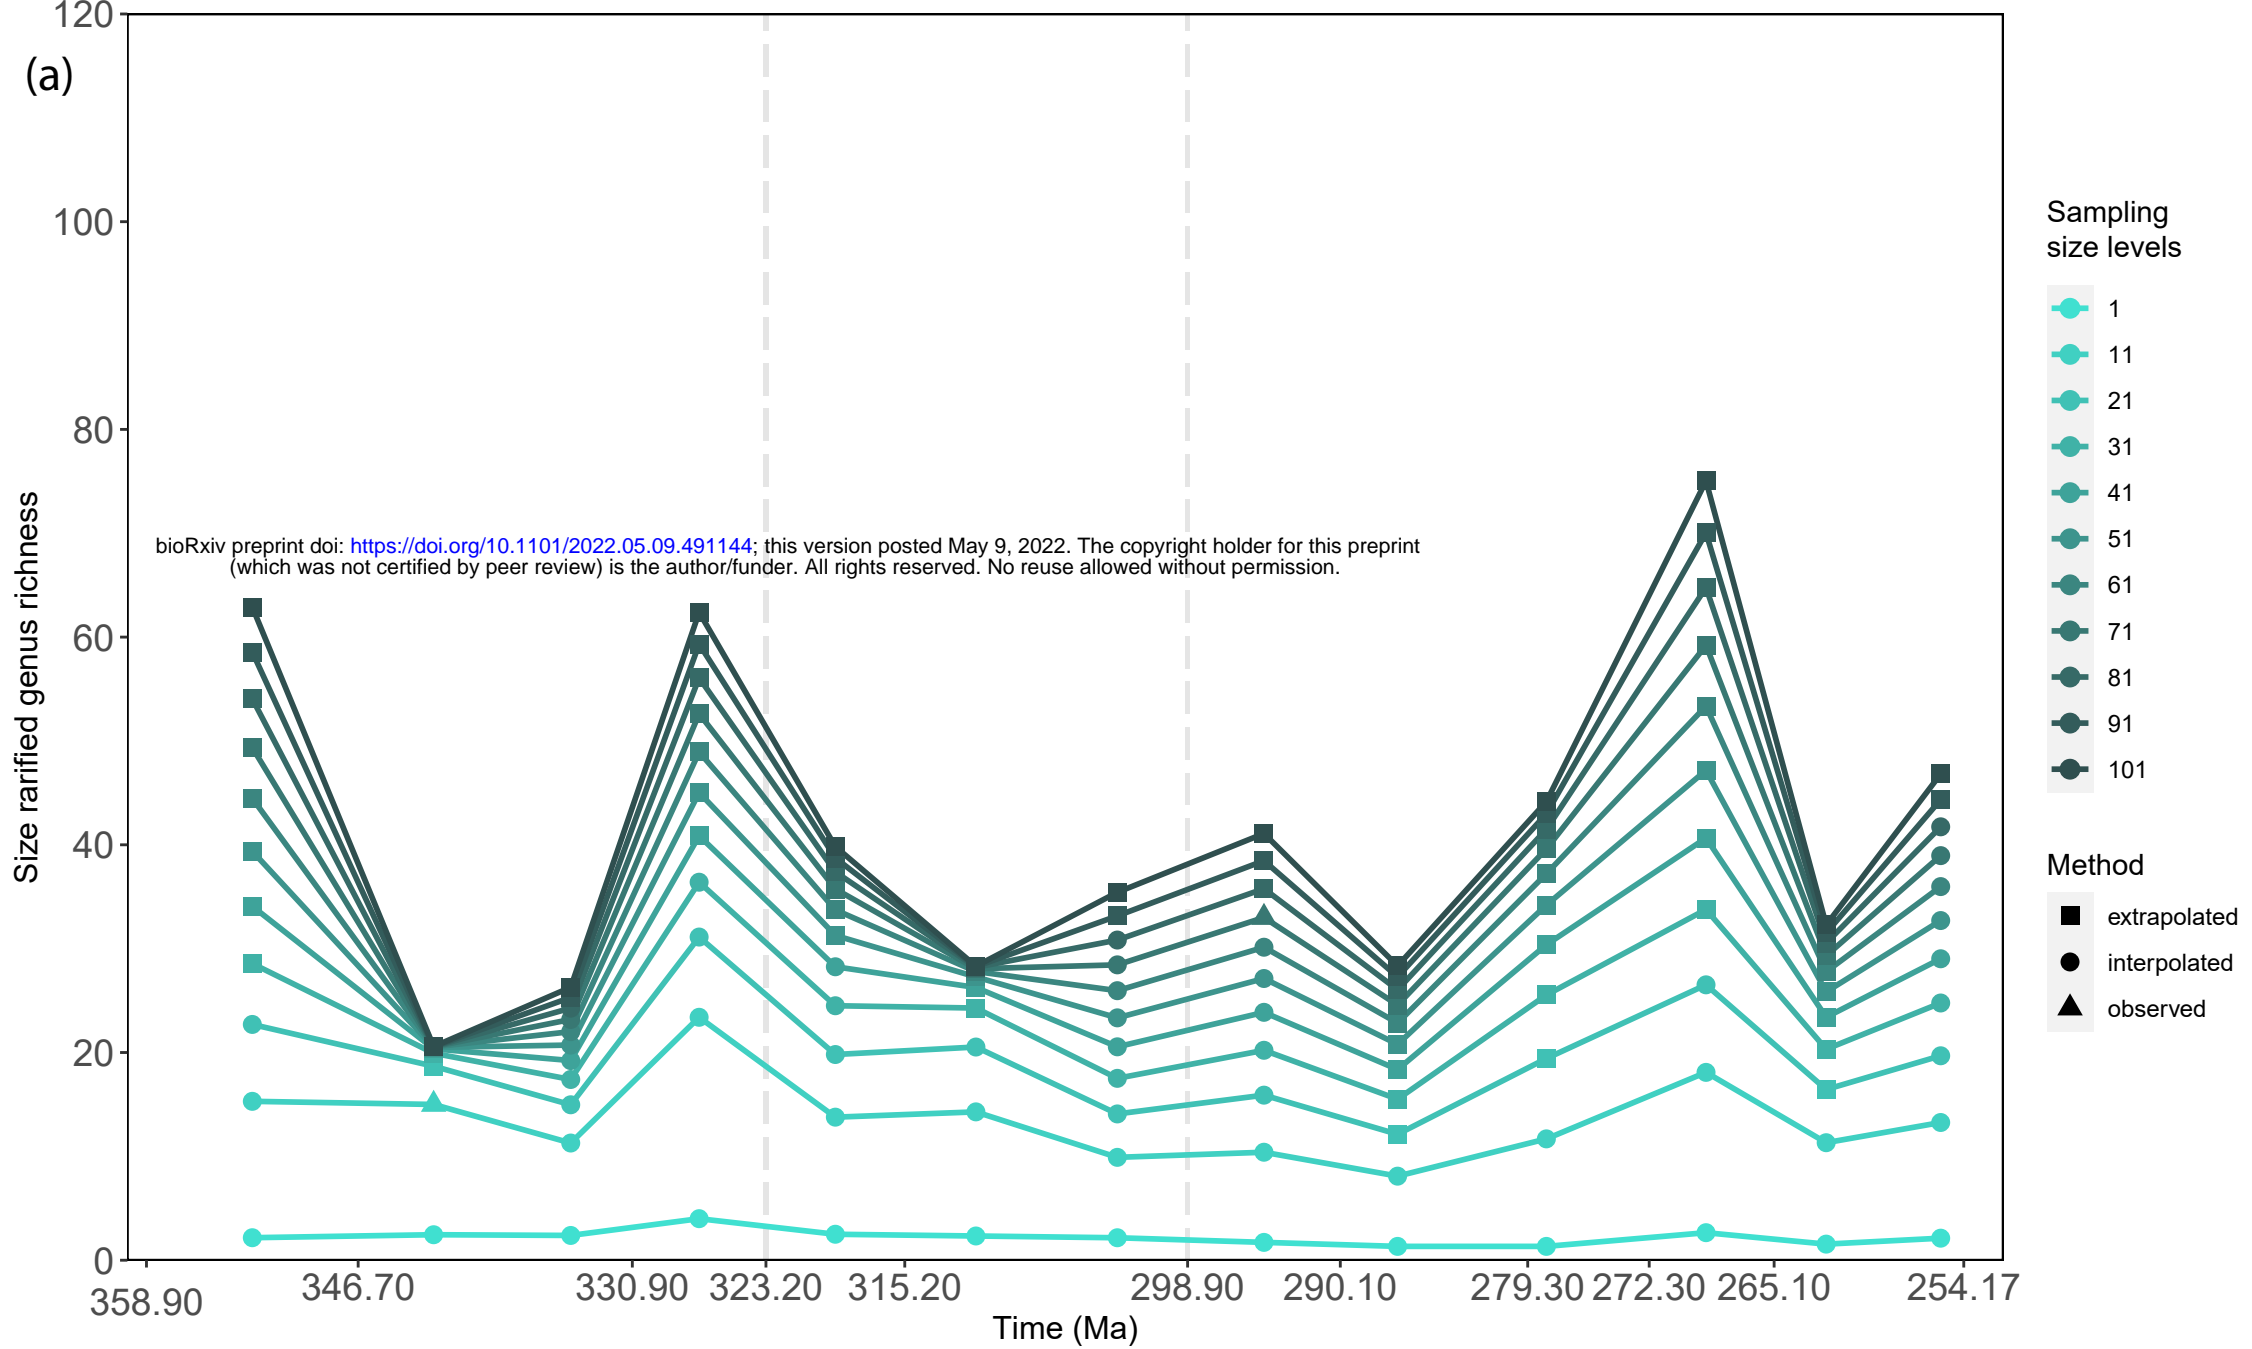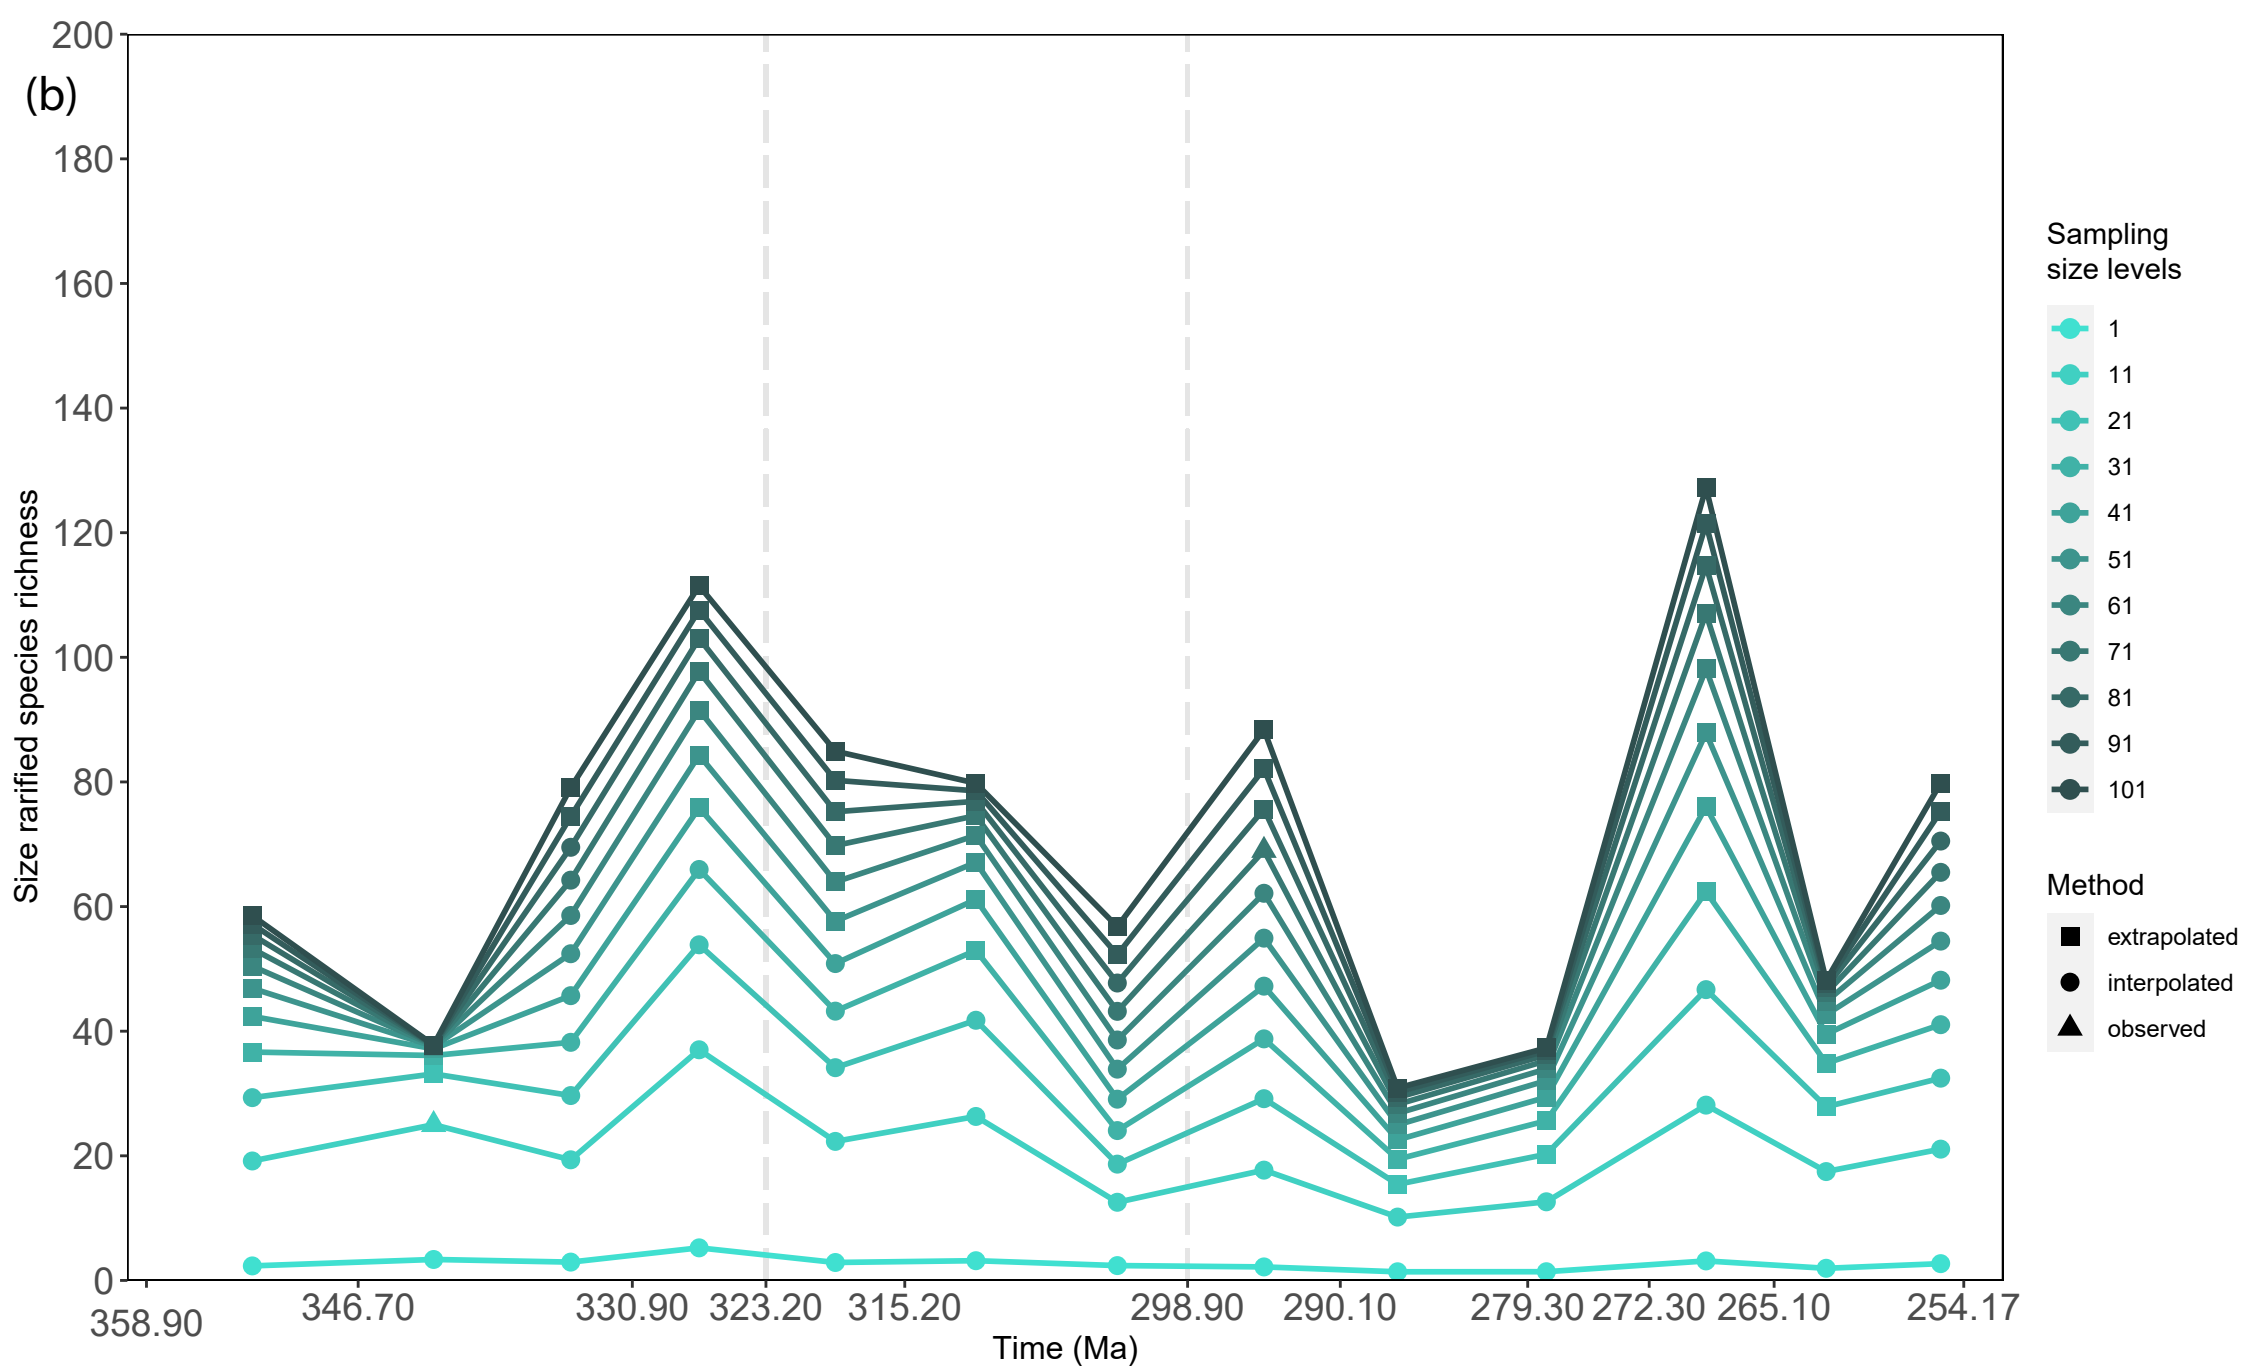

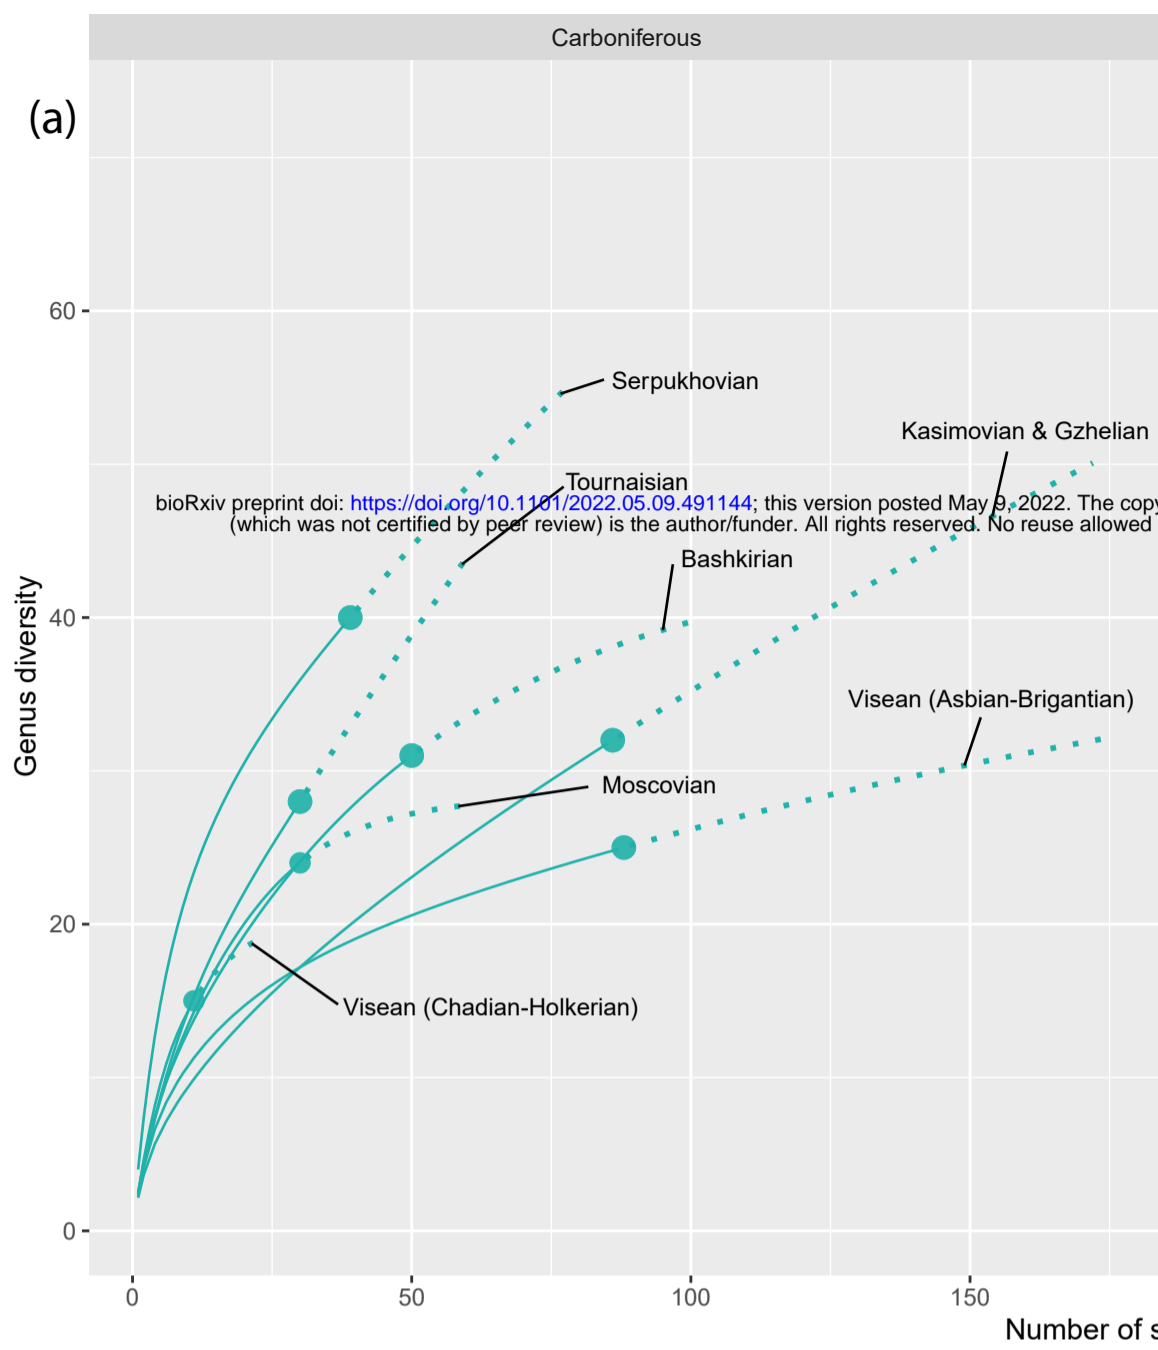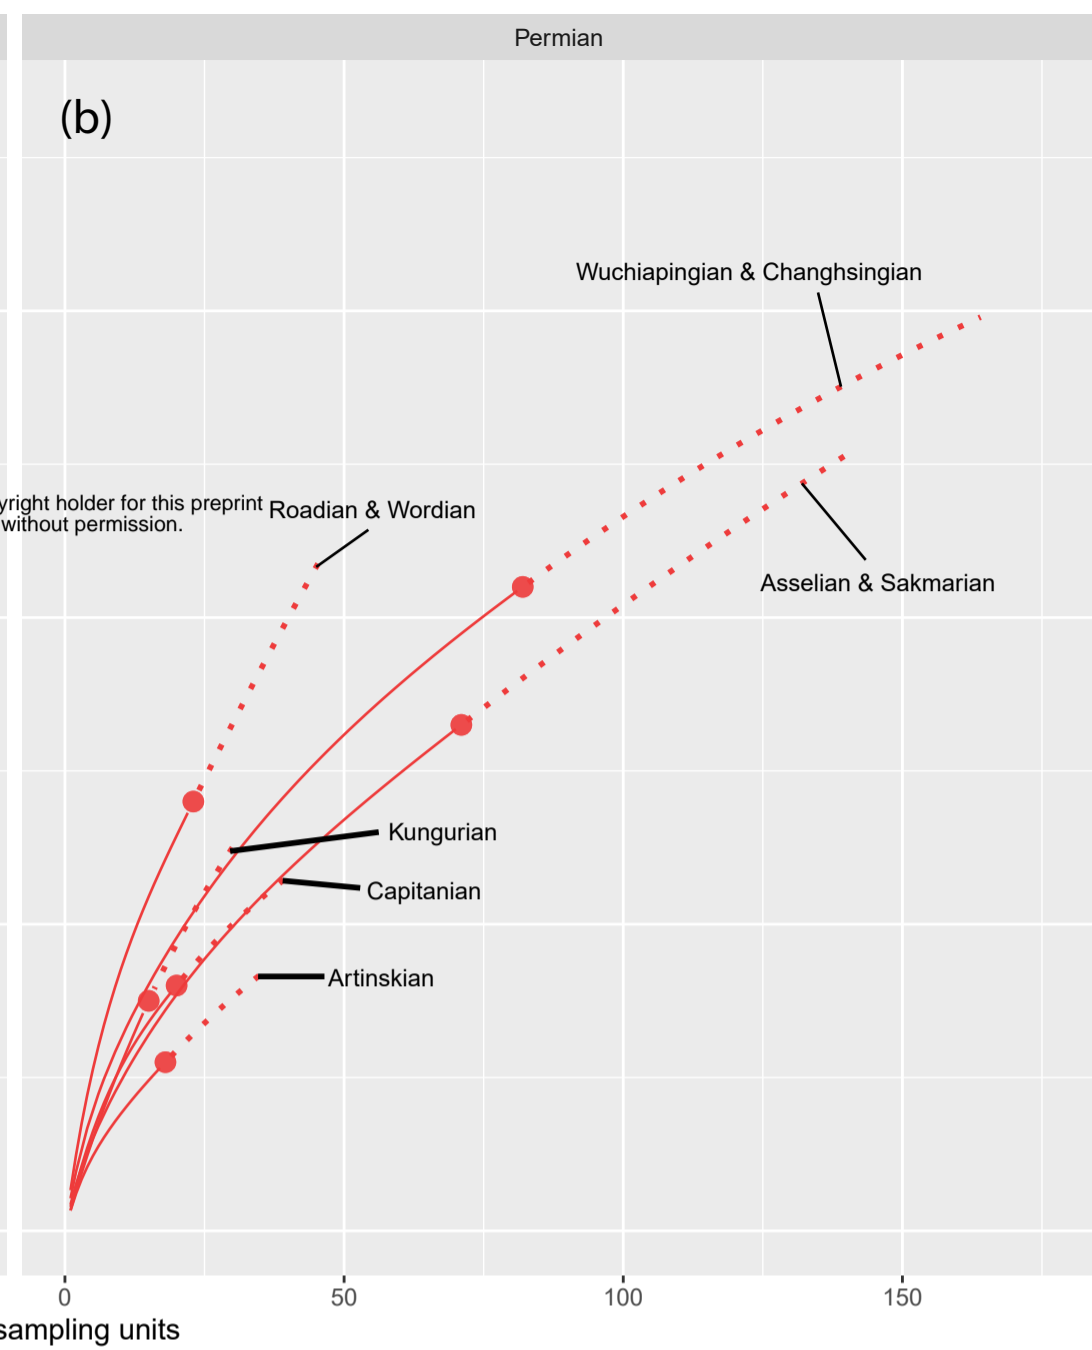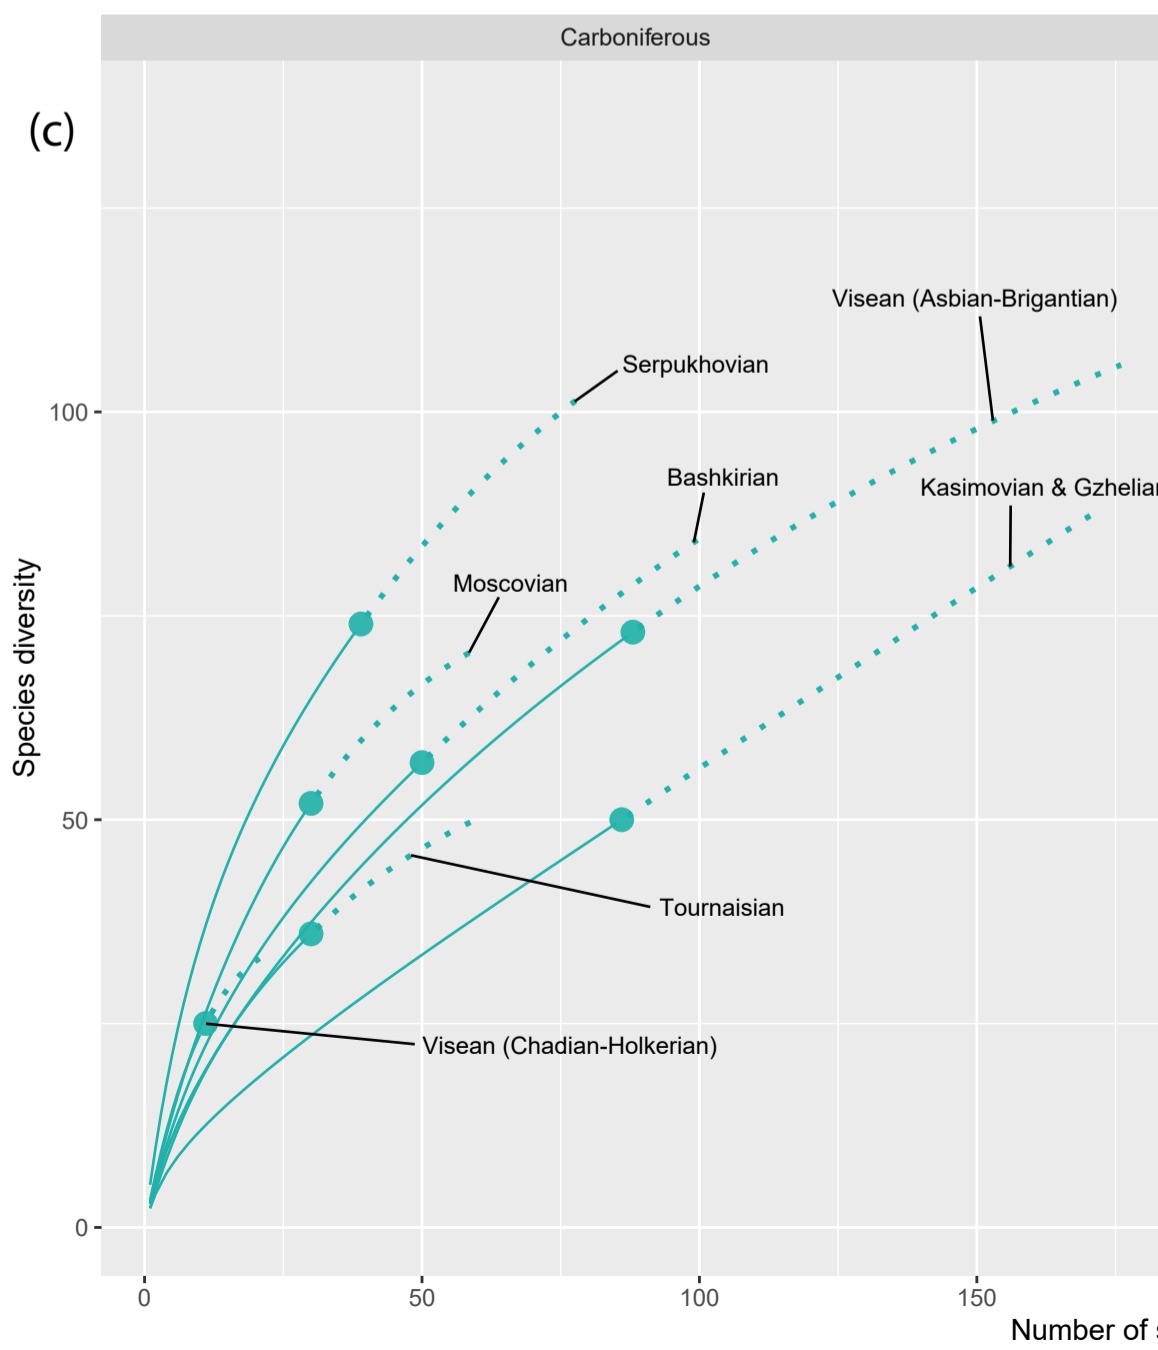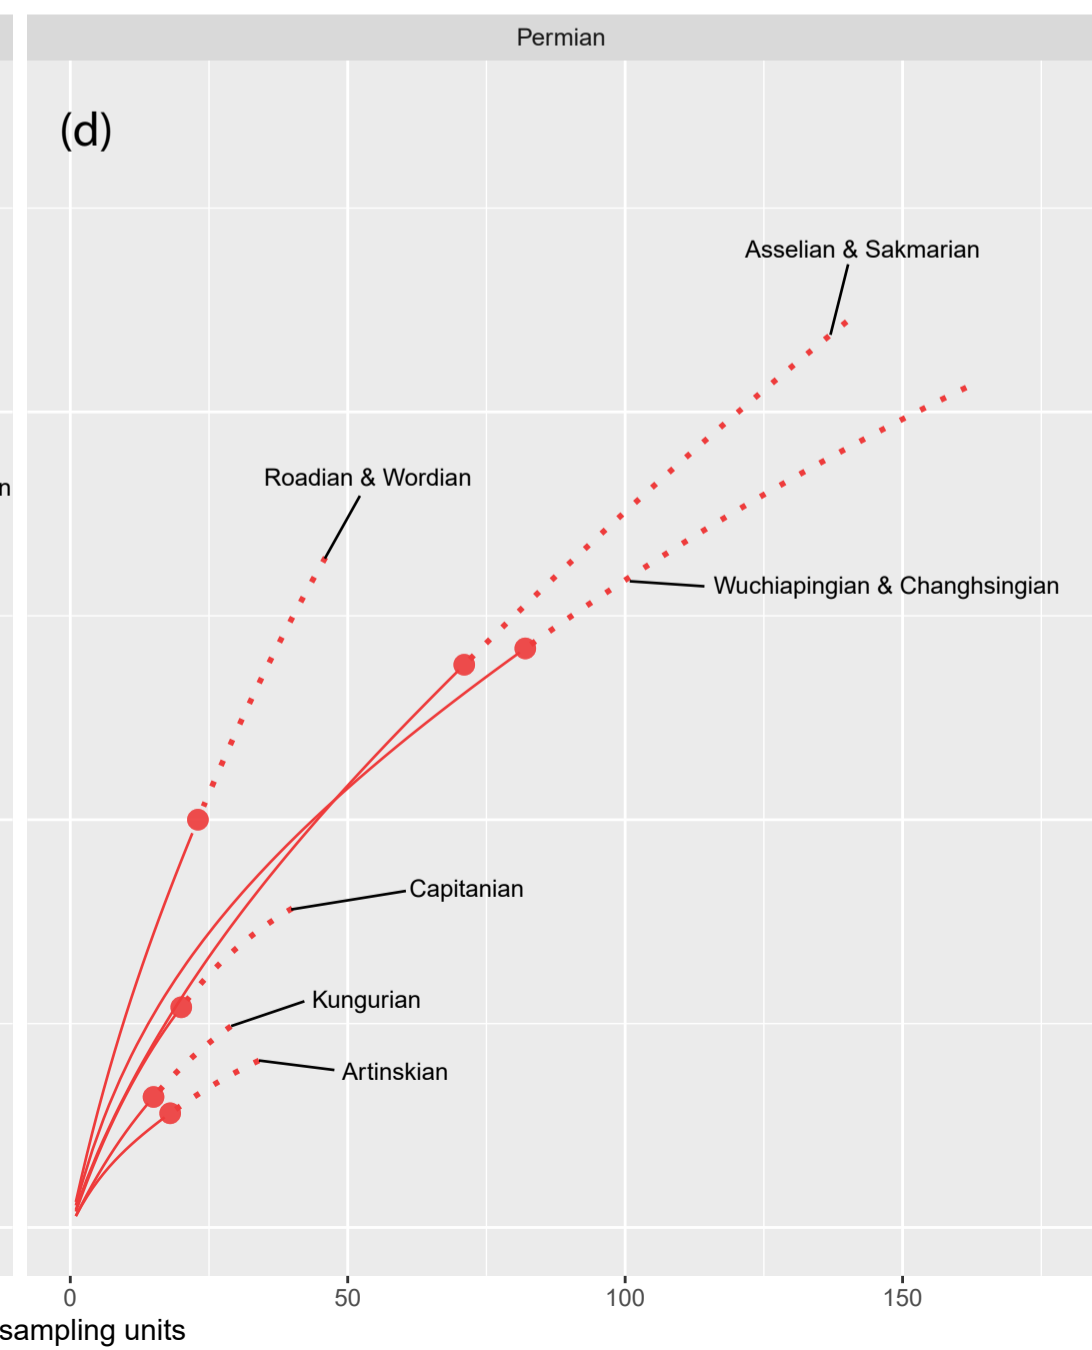

Source: https://www.biorxiv.org/content/10.1101/2022.05.09.491144v1.full.pdf
